# Supplementary material for: Integrative Plasma Metabolic and Lipidomic Modelling of SARS-CoV-2 Infection in Relation to Clinical Severity and Early Mortality Prediction
Source: MDPI journal article supplement (doi:10.3390/ijms241411614), 2023-07-18
Supplement: s1 [file s1]

## **Integrative Plasma Metabolic and Lipidomic Modelling of SARS-CoV-2 Infection in Relation to Clinical Severity and Early Mortality Prediction**

Samantha Lodge <sup>1,2</sup>, Nathan Lawler <sup>1,2</sup>, Nicola Gray <sup>1,2</sup>, Reika Masuda <sup>1</sup>, Philipp Nitschke <sup>1</sup>, Luke Whiley <sup>1,2</sup>, Sze-How Bong <sup>1</sup>, Bu B. Yeap <sup>3,4</sup>, G. Dwivedi <sup>3,5</sup>, Manfred Spraul <sup>6</sup>, Hartmut Schaefer <sup>6</sup>, Rubén Gil-Redondo <sup>7</sup>, Nieves Embade <sup>7</sup>, Oscar Millet <sup>7</sup>, Elaine Holmes <sup>1,2,8</sup>, Julien Wist <sup>1,2,9\*</sup>, and Jeremy K. Nicholson <sup>1,2,10\*</sup>

<sup>1</sup>*Australian National Phenome Center, Health Futures Institute, Murdoch University, Harry Perkins Building, Perth, WA 6150, Australia*

<sup>2</sup>*Center for Computational and Systems Medicine, Health Futures Institute, Murdoch University, Harry Perkins Building, Perth, WA 6150, Australia*

<sup>3</sup>*Medical School, University of Western Australia, Perth, WA 6150, Australia*

<sup>4</sup>*Department of Endocrinology and Diabetes, Fiona Stanley Hospital, Perth, WA 6150, Australia*

<sup>5</sup>*Department of Cardiology, Fiona Stanley Hospital, Perth, WA 6150, Australia*

<sup>6</sup>*Bruker Biospin GmbH, 76287 Rheinstetten, Germany*

<sup>7</sup>*Precision Medicine and Metabolism Laboratory, CIC bioGUNE, Parque Tecnológico de Bizkaia, Bld. 800, 48160, Derio, Spain*

<sup>8</sup>*Department of Metabolism, Digestion and Reproduction, Faculty of Medicine, Imperial College London, Sir Alexander Fleming Building, South Kensington, London, SW7 2AZ, UK*

<sup>9</sup>*Chemistry Department, Universidad del Valle, Cali 76001, Colombia*

<sup>10</sup>*Institute of Global Health Innovation, Faculty of Medicine, Imperial College London, Level 1, Faculty Building, South Kensington Campus, London, SW7 2NA, UK*

**Key words:** COVID-19, SARS-CoV-2, NMR spectroscopy, mass spectrometry, plasma IVDr, metabolic phenotyping, diagnostic modeling, lipoproteins, lipids, mortality prediction, patient stratification.

**Acknowledgements:** We thank the support provided by the Department of Industry, Tourism and Trade of the Government of the Autonomous Community of the Basque Country (Elkartek BG2019) and the Agencia Estatal de Investigación (Spain) for grant RTI2018-101269-B-I00. We thank The Spinnaker Health Research Foundation, WA, The McCusker Foundation, WA, The Western Australian State Government, and the MRFF (grant number 2014349) for funding the Australian National Phenome Centre for this and related work. We thank the Department of Jobs, Tourism, Science and Innovation, Government of Western Australian Premier's Fellowship for funding EH; and ARC Laureate Fellowship funding for EH. We also would like to acknowledge the Western Australian Covid Research Response team (<https://research-au.net/covid-research-response/>). JW thanks Ministerio de Ciencia, Tecnología e Innovación (Minciencias), Ministerio de Educación Nacional, Ministerio de Industria, Comercio y Turismo e ICETEX (792–2017) 2a Convocatoria Ecosistema Científico - Colombia Científica para la Financiación de Proyectos de I + D + i), World Bank and Vicerrectoría de Investigaciones, Pontificia Universidad Javeriana, Bogotá, Colombia (contract no. FP44842 - 221-2018).

## Table of contents

| <b>Section 1 – Cohort Demographic Data</b>                                                                                                                                                                           | <b>Page</b> |
|----------------------------------------------------------------------------------------------------------------------------------------------------------------------------------------------------------------------|-------------|
| Table S1 - Full cohort demographic data for the control samples and SARS-CoV-2 positive patients.                                                                                                                    | S6          |
| <b>Section 2 - Quantification of Plasma Lipoproteins</b>                                                                                                                                                             |             |
| Table S2 - Annotation of the keys used by the Bruker IVDr Lipoprotein Subclass Analysis (B.I.-LISA™) method.                                                                                                         | S7          |
| Table S3 - Annotation of the low molecular weight metabolites                                                                                                                                                        | S9          |
| Table S4 - Annotation of the lipids                                                                                                                                                                                  | S11         |
| <b>Section 3 - Integrated Spectroscopy Modeling</b>                                                                                                                                                                  |             |
| Table S5 - OPLS loadings, Cliff's delta and adjusted p-values of the combined model (low molecular weight metabolites, lipoproteins and lipids) for the comparison of the controls and SARS-CoV-2 positive patients. | S11         |
| Figure S1 - Radar plot showing the log <sub>2</sub> fold change of the top 50 metabolites, lipoproteins and lipids with the most significant p-values for the control versus SARS-CoV-2 positive patients.           | S28         |
| Figure S2 - Orthogonal Partial Least Squared (O-PLS-DA) and eruption plots between controls and SARS-CoV-2 positive patients of the integrative pan-metabolic model after correction for age                         | S29         |
| Figure S3 - O-PLS-DA scores plots of the low molecular weight metabolites, lipoproteins and lipids.                                                                                                                  | S30         |
| Figure S4 – Orthogonal Partial Least Squared (O-PLS-DA) and eruption plots between controls and SARS-CoV-2 positive patients of each severity group for the four Integrated assays.                                  | S31         |
| Table S6 – OPLS loadings, Cliff's delta and adjusted p-values of all the assays combined for the comparison of the controls and SARS-CoV-2 positive patients in severity class B.                                    | S32         |
| Table S7 – OPLS loadings, Cliff's delta and adjusted p-values of all the assays combined for the comparison of the controls and SARS-CoV-2 positive patients in severity class C.                                    | S33         |
| Table S8 – OPLS loadings, Cliff's delta and adjusted p-values of all the assays combined for the comparison of the controls and SARS-CoV-2 positive patients in severity class D.                                    | S35         |
| Table S9 – OPLS loadings, Cliff's delta and adjusted p-values of all the assays combined for the comparison of the controls and SARS-CoV-2 positive patients in severity class E.                                    | S36         |
| Figure S5 – Concentrations of metabolites for the controls and each severity class.                                                                                                                                  | S38         |
| <b>Section 4 - Severity group modeling</b>                                                                                                                                                                           |             |
| Figure S6 – Orthogonal Partial Least Squared (O-PLS-DA) and eruption plots between controls and SARS-CoV-2 positive patients of each severity group for the lipoproteins.                                            | S39         |

|                                                                                                                                                                             |     |
|-----------------------------------------------------------------------------------------------------------------------------------------------------------------------------|-----|
| Figure S7 – $-\log_{10}$ (p-values) between controls and SARS-CoV-2 positive patients of each severity group for the lipoproteins.                                          | S40 |
| Table S10 – OPLS loadings, Cliff's delta and adjusted p-values of the lipoproteins for the comparison of the controls and SARS-CoV-2 positive patients in severity class B. | S41 |
| Table S11 – OPLS loadings, Cliff's delta and adjusted p-values of the lipoproteins for the comparison of the controls and SARS-CoV-2 positive patients in severity class C. | S43 |
| Table S12 – OPLS loadings, Cliff's delta and adjusted p-values of the lipoproteins for the comparison of the controls and SARS-CoV-2 positive patients in severity class D. | S45 |
| Table S13 – OPLS loadings, Cliff's delta and adjusted p-values of the lipoproteins for the comparison of the controls and SARS-CoV-2 positive patients in severity class E. | S47 |
| Figure S8 – Orthogonal Partial Least Squared (O-PLS-DA) and eruption plots between different severity classes of SARS-CoV-2 positive patients for the lipoproteins.         | S50 |
| Table S14 – OPLS loadings, Cliff's delta and adjusted p-values of the lipoproteins for the comparison of severity class C and E.                                            | S51 |
| Figure S9 – Orthogonal Partial Least Squared (O-PLS-DA) and eruption plots between controls and SARS-CoV-2 positive patients of each severity group for the Lipids.         | S53 |

|                                                                                                                                                                                                                                  |     |
|----------------------------------------------------------------------------------------------------------------------------------------------------------------------------------------------------------------------------------|-----|
| Table S15 – OPLS loadings, Cliff's delta and adjusted p-values of the lipids for the comparison of the controls and SARS-CoV-2 positive patients in severity class B.                                                            | S54 |
| Table S16 – OPLS loadings, Cliff's delta and adjusted p-values of the lipids for the comparison of the controls and SARS-CoV-2 positive patients in severity class C.                                                            | S55 |
| Table S17 – OPLS loadings, Cliff's delta and adjusted p-values of the lipids for the comparison of the controls and SARS-CoV-2 positive patients in severity class D.                                                            | S57 |
| Table S18 – OPLS loadings, Cliff's delta and adjusted p-values of the lipids for the comparison of the controls and SARS-CoV-2 positive patients in severity class E.                                                            | S58 |
| Figure S10 – Orthogonal Partial Least Squared (O-PLS-DA) and eruption plots between different severity classes of SARS-CoV-2 positive patients for the lipids                                                                    | S60 |
| Table S19 – OPLS loadings, Cliff's delta and adjusted p-values of the lipids for the comparison of severity class B and E.                                                                                                       | S61 |
| Table S20 – OPLS loadings, Cliff's delta and adjusted p-values of the lipids for the comparison of severity class C and E.                                                                                                       | S18 |
| Figure S11 – Orthogonal Partial Least Squared (O-PLS-DA), eruption plots and $-\log_{10}$ (p-values) between controls and SARS-CoV-2 positive patients of each severity group for the low molecular weight metabolites.          | S64 |
| Table S21 – OPLS loadings, Cliff's delta and adjusted p-values of the low molecular weight metabolites for the comparison of the controls and SARS-CoV-2 positive patients in severity class B.                                  | S65 |
| Table S22 – OPLS loadings, Cliff's delta and adjusted p-values of the low molecular weight metabolites for the comparison of the controls and SARS-CoV-2 positive patients in severity class C.                                  | S66 |
| Table S23 – OPLS loadings, Cliff's delta and adjusted p-values of the low molecular weight metabolites for the comparison of the controls and SARS-CoV-2 positive patients in severity class D.                                  | S67 |
| Table S24 – OPLS loadings, Cliff's delta and adjusted p-values of the low molecular weight metabolites for the comparison of the controls and SARS-CoV-2 positive patients in severity class E.                                  | S68 |
| Figure S12 – Orthogonal Partial Least Squared (O-PLS-DA), eruption plots and $-\log_{10}$ (p-values) between different severity classes of SARS-CoV-2 positive patients for the low molecular weight metabolites.                | S70 |
| Table S25 – OPLS loadings, Cliff's delta and adjusted p-values for the low molecular weight metabolites for the comparison of severity class B and D.                                                                            | S71 |
| Table S26 – OPLS loadings, Cliff's delta and adjusted p-values for the low molecular weight metabolites for the comparison of severity class B and E.                                                                            | S71 |
| Table S27 – OPLS loadings, Cliff's delta and adjusted p-values for the low molecular weight metabolites for the comparison of severity class C and D.                                                                            | S71 |
| Table S28 – OPLS loadings, Cliff's delta and adjusted p-values for the low molecular weight metabolites for the comparison of severity class C and E.                                                                            | S72 |
| Table S29 – OPLS loadings, Cliff's delta and adjusted p-values for the low molecular weight metabolites for the comparison of severity class D and E.                                                                            | S73 |
| Figure S13 – Radar plots showing the $\log_2$ fold change between controls and SARS-CoV-2 severity group E patients of the most significant ( $p < 0.05$ ) metabolites, lipids and lipoproteins ordered by $\log_2$ fold change. | S74 |
| <b>Section 6 - Mortality prediction</b>                                                                                                                                                                                          |     |

|                                                                                                                                                                                                                                                              |     |
|--------------------------------------------------------------------------------------------------------------------------------------------------------------------------------------------------------------------------------------------------------------|-----|
| Table S30 – Demographics for the severity group E patients who survived and who did not.                                                                                                                                                                     | S75 |
| Table S31 - OPLS loadings, Cliff's delta and adjusted p-values of the combined model (low molecular weight metabolites, lipoproteins and lipids) for the comparison group E severity patients comparing who survived and who died, samples were age matched. | S76 |
| Figure S14 – Correlation plot of the (A) survived model and (B) Did not survive model.                                                                                                                                                                       | S88 |
| Figure S15 – Modeling COVID-19 mortality prediction using only the lipoproteins                                                                                                                                                                              | S89 |
| Table S32 – OPLS loadings, Cliff's delta and adjusted p-values of lipoprotein model for the comparison group E severity patients comparing who survived and who died, samples were age matched.                                                              | S90 |
| Figure S16 - AUROC built using HCer 16:0 and PEO (18:0/18:1)                                                                                                                                                                                                 | S91 |

**Table S1 - Full cohort demographic data for the control samples and SARS-CoV-2 positive patients.**

|                                       | <b>Controls<br/>(n=89)</b> | <b>SARS-CoV-<br/>2 Positive<br/>(+)<br/>Group B<br/>severity<br/>(n=18)</b> | <b>SARS-CoV-<br/>2 Positive<br/>(+) Group C<br/>severity<br/>(n=139)</b> | <b>SARS-CoV-<br/>2 Positive<br/>(+)<br/>Group D<br/>severity<br/>(n=92)</b> | <b>SARS-CoV-<br/>2 Positive<br/>(+)<br/>Group E<br/>severity<br/>(n=57)</b> |
|---------------------------------------|----------------------------|-----------------------------------------------------------------------------|--------------------------------------------------------------------------|-----------------------------------------------------------------------------|-----------------------------------------------------------------------------|
| Sex, Male                             | 43<br>(48.31%)             | 5 (27.78%)                                                                  | 56 (40.29%)                                                              | 44 (47.83%)                                                                 | 33 (57.89%)                                                                 |
| Age, years [SD]                       | 48.00<br>[±11.95]          | 62.00<br>[±18.13]                                                           | 68.00<br>[±18.21]                                                        | 71.00<br>[±17.22]                                                           | 75.00<br>[±13.46]                                                           |
| BMI, kg/m <sup>2</sup> [SD]           | 23.81<br>[±4.57]           | -                                                                           | -                                                                        | -                                                                           | -                                                                           |
| Pre-diabetic/<br>diabetic             | -                          | 3 (16.67%)                                                                  | 29 (20.86%)                                                              | 24 (26.09%)                                                                 | 19 (33.33%)                                                                 |
| Hypertension                          | -                          | 5 (27.78%)                                                                  | 48 (34.53%)                                                              | 50 (54.35%)                                                                 | 33 (57.89%)                                                                 |
| Cardiovascular<br>disease             | -                          | 3 (16.67%)                                                                  | 33 (23.74%)                                                              | 29 (31.52%)                                                                 | 21 (36.84%)                                                                 |
| Cerebrovascular<br>disease            | -                          | 2 (11.11%)                                                                  | 16 (11.51%)                                                              | 9 (9.78%)                                                                   | 10 (17.54%)                                                                 |
| Chronic Renal<br>Disease              | -                          | 0                                                                           | 8 (5.76%)                                                                | 9 (9.78%)                                                                   | 6 (10.53%)                                                                  |
| Chronic liver<br>disease              | -                          | 0                                                                           | 2 (1.44%)                                                                | 1 (1.09%)                                                                   | 2 (3.51%)                                                                   |
| Patients who<br>died<br>of SARS-CoV-2 | -                          | 0                                                                           | 0                                                                        | 0                                                                           | 32 (56.14%)                                                                 |

### **Quantification of Plasma Lipoproteins, Lipids and the low molecular weight metabolites**

Plasma lipoproteins – A total of 112 lipoprotein parameters were quantified based on 1D NMR experiments as part of Bruker's IVDr experiment suite for blood plasma. This approach is termed Bruker's IVDr lipoprotein class and subclass Analysis (B.I.-LISA™) and lipid analytes include cholesterol, free cholesterol, phospholipids, triglycerides, apolipoproteins A1/A2/B100 and ratio B100/A1, in total plasma concentration and resolved for main lipoprotein classes and subclasses. Main classes of plasma-lipoproteins were defined as: high-density lipoprotein (HDL, density 1.063–1.210 kg/L), intermediate-density lipoprotein (IDL, density 1.006–1.019 kg/L) low-density lipoprotein (LDL, density 1.09–1.63 kg/L) and very low-density lipoprotein (VLDL, 0.950–1.006 kg/L). The main lipoprotein classes HDL, LDL, VLDL were further divided into different lipoprotein sub-classes: (LDL-1: 1.019–1.031 kg/L, LDL-2: 1.031–1.034 kg/L, LDL-3: 1.034–1.037 kg/L, LDL-4: 1.037–1.040 kg/L, LDL-5: 1.040–1.044 kg/L, LDL-6: 1.044–1.063 kg/L), and

the HDL sub-fractions into four density classes (HDL-1 1.063–1.100 kg/L, HDL-2 1.100–1.125 kg/L, HDL-3 1.125–1.175 kg/L, and HDL-4 1.175–1.210 kg/L), the VLDL sub-fractions divided into 5 density classes.

**Table S2- Annotation of the keys used by the Bruker IVDr Lipoprotein Subclass Analysis (B.I.-LISA™) method.** Abbreviations: LDL – low-density lipoprotein; HDL – high-density lipoprotein; VLDL – very low-density lipoprotein; IDL – intermediate-density lipoprotein.

| Key  | Class/subclass                       | Compound                                | Concentration unit |
|------|--------------------------------------|-----------------------------------------|--------------------|
| TPTG | Total Plasma                         | Triglycerides                           | mg/dL              |
| TPCH | Total Plasma                         | Cholesterol                             | mg/dL              |
| LDCH | LDL                                  | Cholesterol                             | mg/dL              |
| HDCH | HDL                                  | Cholesterol                             | mg/dL              |
| TPA1 | Total Plasma                         | Apolipoprotein-A1                       | mg/dL              |
| TPA2 | Total Plasma                         | Apolipoprotein-A2                       | mg/dL              |
| TPAB | Total Plasma                         | Apolipoprotein-B100                     | mg/dL              |
| LDHD | Ratio LDL and HDL Cholesterol        | LDL Cholesterol / HDL Cholesterol       | -/-                |
| ABA1 | Ratio of Apolipoproteins A1 and B100 | Apolipoprotein-A1 / Apolipoprotein-B100 | -/-                |
| TBPN | Apolipoprotein-B100 particles        | carrying Particle Number                | nmol/L             |
| VLPN | VLDL                                 | Particle Number                         | nmol/L             |
| IDPN | IDL                                  | Particle Number                         | nmol/L             |
| LDPN | LDL                                  | Particle Number                         | nmol/L             |
| L1PN | LDL-1                                | Particle Number                         | nmol/L             |
| L2PN | LDL-2                                | Particle Number                         | nmol/L             |
| L3PN | LDL-3                                | Particle Number                         | nmol/L             |
| L4PN | LDL-4                                | Particle Number                         | nmol/L             |
| L5PN | LDL-5                                | Particle Number                         | nmol/L             |
| L6PN | LDL-6                                | Particle Number                         | nmol/L             |
| VLTG | VLDL Class                           | Triglycerides                           | mg/dL              |
| IDTG | IDL Class                            | Triglycerides                           | mg/dL              |
| LDTG | LDL Class                            | Triglycerides                           | mg/dL              |
| HDTG | HDL Class                            | Triglycerides                           | mg/dL              |
| VLCH | VLDL Class                           | Cholesterol                             | mg/dL              |
| IDCH | IDL Class                            | Cholesterol                             | mg/dL              |
| LDCH | LDL Class                            | Cholesterol                             | mg/dL              |
| HDCH | HDL Class                            | Cholesterol                             | mg/dL              |
| VLFC | VLDL Class                           | Free Cholesterol                        | mg/dL              |
| IDFC | IDL Class                            | Free Cholesterol                        | mg/dL              |
| LDFC | LDL Class                            | Free Cholesterol                        | mg/dL              |
| HDFC | HDL Class                            | Free Cholesterol                        | mg/dL              |
| VLPL | VLDL Class                           | Phospholipids                           | mg/dL              |
| IDPL | IDL Class                            | Phospholipids                           | mg/dL              |
| LDPL | LDL Class                            | Phospholipids                           | mg/dL              |
| HDPL | HDL Class                            | Phospholipids                           | mg/dL              |

|                      |                            |       |
|----------------------|----------------------------|-------|
| HDA1 HDL Class       | Apolipoprotein-A1          | mg/dL |
| HDA2 HDL Class       | Apolipoprotein-A2          | mg/dL |
| VLAB VLDL Class      | Apolipoprotein-B100        | mg/dL |
| IDAB IDL Class       | Apolipoprotein-B100        | mg/dL |
| LDAB LDL Class       | Apolipoprotein-B100        | mg/dL |
| V1TG VLDL-1 Subclass | Triglycerides              | mg/dL |
| V2TG VLDL-2 Subclass | Triglycerides              | mg/dL |
| V3TG VLDL-3 Subclass | Triglycerides              | mg/dL |
| V4TG VLDL-4 Subclass | Triglycerides              | mg/dL |
| V5TG VLDL-5 Subclass | Triglycerides              | mg/dL |
| V1CH VLDL-1 Subclass | Cholesterol                | mg/dL |
| V2CH VLDL-2 Subclass | Cholesterol                | mg/dL |
| V3CH VLDL-3 Subclass | Cholesterol                | mg/dL |
| V4CH VLDL-4 Subclass | Cholesterol                | mg/dL |
| V5CH VLDL-5 Subclass | Cholesterol                | mg/dL |
| V1FC VLDL-1 Subclass | Free Cholesterol           | mg/dL |
| V2FC VLDL-2 Subclass | Free Cholesterol           | mg/dL |
| V3FC VLDL-3 Subclass | Free Cholesterol           | mg/dL |
| V4FC VLDL-4 Subclass | Free Cholesterol           | mg/dL |
| V5FC VLDL-5 Subclass | Free Cholesterol           | mg/dL |
| V1PL VLDL-1 Subclass | Phospholipids              | mg/dL |
| V2PL VLDL-2 Subclass | Phospholipids              | mg/dL |
| V3PL VLDL-3 Subclass | Phospholipids              | mg/dL |
| V4PL VLDL-4 Subclass | Phospholipids              | mg/dL |
| V5PL VLDL-5 Subclass | Phospholipids              | mg/dL |
| L1TG LDL-1 Subclass  | Triglycerides              | mg/dL |
| L2TG LDL-2 Subclass  | Triglycerides              | mg/dL |
| L3TG LDL-3 Subclass  | Triglycerides              | mg/dL |
| L4TG LDL-4 Subclass  | Triglycerides              | mg/dL |
| L5TG LDL-5 Subclass  | Triglycerides              | mg/dL |
| L6TG LDL-6 Subclass  | Triglycerides              | mg/dL |
| L1CH LDL-1 Subclass  | Cholesterol                | mg/dL |
| L2CH LDL-2 Subclass  | Cholesterol                | mg/dL |
| L3CH LDL-3 Subclass  | Cholesterol                | mg/dL |
| L4CH LDL-4 Subclass  | Cholesterol                | mg/dL |
| L5CH LDL-5 Subclass  | Cholesterol                | mg/dL |
| L6CH LDL-6 Subclass  | Cholesterol                | mg/dL |
| L1FC LDL-1 Subclass  | Free apoHDA<br>Cholesterol | mg/dL |
| L2FC LDL-2 Subclass  | Free Cholesterol           | mg/dL |
| L3FC LDL-3 Subclass  | Free Cholesterol           | mg/dL |
| L4FC LDL-4 Subclass  | Free Cholesterol           | mg/dL |
| L5FC LDL-5 Subclass  | Free Cholesterol           | mg/dL |
| L6FC LDL-6 Subclass  | Free Cholesterol           | mg/dL |
| L1PL LDL-1 Subclass  | Phospholipids              | mg/dL |
| L2PL LDL-2 Subclass  | Phospholipids              | mg/dL |

|      |                |                     |       |
|------|----------------|---------------------|-------|
| L3PL | LDL-3 Subclass | Phospholipids       | mg/dL |
| L4PL | LDL-4 Subclass | Phospholipids       | mg/dL |
| L5PL | LDL-5 Subclass | Phospholipids       | mg/dL |
| L6PL | LDL-6 Subclass | Phospholipids       | mg/dL |
| L1AB | LDL-1 Subclass | Apolipoprotein-B100 | mg/dL |
| L2AB | LDL-2 Subclass | Apolipoprotein-B100 | mg/dL |
| L3AB | LDL-3 Subclass | Apolipoprotein-B100 | mg/dL |
| L4AB | LDL-4 Subclass | Apolipoprotein-B100 | mg/dL |
| L5AB | LDL-5 Subclass | Apolipoprotein-B100 | mg/dL |
| L6AB | LDL-6 Subclass | Apolipoprotein-B100 | mg/dL |
| H1TG | HDL-1 Subclass | Triglycerides       | mg/dL |
| H2TG | HDL-2 Subclass | Triglycerides       | mg/dL |
| H3TG | HDL-3 Subclass | Triglycerides       | mg/dL |
| H4TG | HDL-4 Subclass | Triglycerides       | mg/dL |
| H1CH | HDL-1 Subclass | Cholesterol         | mg/dL |
| H2CH | HDL-2 Subclass | Cholesterol         | mg/dL |
| H3CH | HDL-3 Subclass | Cholesterol         | mg/dL |
| H4CH | HDL-4 Subclass | Cholesterol         | mg/dL |
| H1FC | HDL-1 Subclass | Free Cholesterol    | mg/dL |
| H2FC | HDL-2 Subclass | Free Cholesterol    | mg/dL |
| H3FC | HDL-3 Subclass | Free Cholesterol    | mg/dL |
| H4FC | HDL-4 Subclass | Free Cholesterol    | mg/dL |
| H1PL | HDL-1 Subclass | Phospholipids       | mg/dL |
| H2PL | HDL-2 Subclass | Phospholipids       | mg/dL |
| H3PL | HDL-3 Subclass | Phospholipids       | mg/dL |
| H4PL | HDL-4 Subclass | Phospholipids       | mg/dL |
| H1A1 | HDL-1 Subclass | Apolipoprotein-A1   | mg/dL |
| H2A1 | HDL-2 Subclass | Apolipoprotein-A1   | mg/dL |
| H3A1 | HDL-3 Subclass | Apolipoprotein-A1   | mg/dL |
| H4A1 | HDL-4 Subclass | Apolipoprotein-A1   | mg/dL |
| H1A2 | HDL-1 Subclass | Apolipoprotein-A2   | mg/dL |
| H2A2 | HDL-2 Subclass | Apolipoprotein-A2   | mg/dL |
| H3A2 | HDL-3 Subclass | Apolipoprotein-A2   | mg/dL |
| H4A2 | HDL-4 Subclass | Apolipoprotein-A2   | mg/dL |

**Table S3 - Annotation of the low molecular weight metabolites. Those in *italics* were quantified by NMR, while the remaining were quantified by LC-MS.**

| <b>Abbreviations in models</b> | <b>Metabolite</b>       | <b>Concentration unit</b> |
|--------------------------------|-------------------------|---------------------------|
| <i>Acetic acid</i>             | <i>Acetic acid</i>      | <i>mmol/L</i>             |
| <i>Acetoacetic acid</i>        | <i>Acetoacetic acid</i> | <i>mmol/L</i>             |
| <i>Acetone</i>                 | <i>Acetone</i>          | <i>mmol/L</i>             |
| <i>Citric acid</i>             | <i>Citric acid</i>      | <i>mmol/L</i>             |
| <i>Creatine</i>                | <i>Creatine</i>         | <i>mmol/L</i>             |
| <i>Creatinine</i>              | <i>Creatinine</i>       | <i>mmol/L</i>             |
| <i>Formic acid</i>             | <i>Formic acid</i>      | <i>mmol/L</i>             |

|                                |                                |        |
|--------------------------------|--------------------------------|--------|
| Glucose                        | Glucose                        | mmol/L |
| D-3-hydroxybutyric acid        | D-3-hydroxybutyric acid        | mmol/L |
| Lactic acid                    | Lactic acid                    | mmol/L |
| Pyruvic acid                   | Pyruvic acid                   | mmol/L |
| Tryptophan                     | Tryptophan                     | μmol/L |
| 3-Hydroxykynurenine            | 3-Hydroxykynurenine            | μmol/L |
| 3-Hydroxyanthranilic acid      | 3-Hydroxyanthranilic acid      | μmol/L |
| Kynurenic acid                 | Kynurenic acid                 | μmol/L |
| Quinolinic acid                | Quinolinic acid                | μmol/L |
| Picolinic acid                 | Picolinic acid                 | μmol/L |
| Xanthurenic acid               | Xanthurenic acid               | μmol/L |
| Kynurenine                     | Kynurenine                     | μmol/L |
| Indole-3-acetic acid           | Indole-3-acetic acid           | μmol/L |
| 5-Hydroxyindole acetic acid    | 5-Hydroxyindole acetic acid    | μmol/L |
| Neopterin                      | Neopterin                      | μmol/L |
| Serotonin                      | Serotonin                      | μmol/L |
| 1-methylhistidine              | 1-methylhistidine              | μmol/L |
| 3-methylhistidine              | 3-methylhistidine              | μmol/L |
| Alanine                        | Alanine                        | μmol/L |
| Alpha aminobutyric acid        | Alpha aminobutyric acid        | μmol/L |
| Arginine                       | Arginine                       | μmol/L |
| Aspartic acid                  | Aspartic acid                  | μmol/L |
| Citrulline                     | Citrulline                     | μmol/L |
| Glutamic acid                  | Glutamic acid                  | μmol/L |
| Glutamine                      | Glutamine                      | μmol/L |
| Histidine                      | Histidine                      | μmol/L |
| Isoleucine                     | Isoleucine                     | μmol/L |
| Leucine                        | Leucine                        | μmol/L |
| Lysine                         | Lysine                         | μmol/L |
| Methionine                     | Methionine                     | μmol/L |
| Ornithine                      | Ornithine                      | μmol/L |
| Phenylalanine                  | Phenylalanine                  | μmol/L |
| Proline                        | Proline                        | μmol/L |
| Serine                         | Serine                         | μmol/L |
| Taurine                        | Taurine                        | μmol/L |
| Threonine                      | Threonine                      | μmol/L |
| Tyrosine                       | Tyrosine                       | μmol/L |
| Valine                         | Valine                         | μmol/L |
| Lac.pyr                        | Lactate/pyruvate               | -/-    |
| Kynurenine/tryptophan          | Kynurenine/tryptophan          | -/-    |
| 3-hydroxykynurenine/tryptophan | 3-hydroxykynurenine/tryptophan | -/-    |
| Kynurenic acid/tryptophan      | Kynurenic acid/tryptophan      | -/-    |
| Neopterin/tryptophan           | Neopterin/tryptophan           | -/-    |
| Serotonin/tryptophan           | Serotonin/tryptophan           | -/-    |
| Quinolinic acid/tryptophan     | Quinolinic acid/tryptophan     | -/-    |
| Fisher's ratio                 | Fisher's ratio                 | -/-    |

|                       |                                                     |
|-----------------------|-----------------------------------------------------|
| Branched AA/taurine   | Branched chain amino acids/aromatic -/- amino acids |
| Asp...glu...asn...gln | Asp:Glu/Asn:Gln -/-                                 |

**Table S4 - Annotation of the lipids**

| Abbreviation | Subclasses               | Concentration unit |
|--------------|--------------------------|--------------------|
| CE           | Cholesterol esters       | μmol/L             |
| CER          | Ceramides                | μmol/L             |
| DAG          | Diacylglycerides         | μmol/L             |
| DCER         | Dihydroceramides         | μmol/L             |
| FFA          | Free fatty acids         | μmol/L             |
| HCER         | Hexosylceramides         | μmol/L             |
| LCER         | Lactosylceramides        | μmol/L             |
| LPC          | Lysophosphocholines      | μmol/L             |
| LPE          | Lysophosphoethanolamines | μmol/L             |
| LPG          | Lysophosphoglycerols     | μmol/L             |
| LPI          | Lysophosphoinositols     | μmol/L             |
| MAG          | Monoacylglycerols        | μmol/L             |
| PC           | Phosphocholines          | μmol/L             |
| PE           | Phosphoethanolamines     | μmol/L             |
| PG           | Phosphoglycerols         | μmol/L             |
| PI           | Phosphoinositols         | μmol/L             |
| PS           | Phosphoserines           | μmol/L             |
| SM           | Sphingomyelins           | μmol/L             |
| TAG          | Triacylglycerides        | μmol/L             |

## Integrated Spectroscopy Modeling

**Table S5 - OPLS loadings, Cliff's delta and adjusted p-values of the combined model (low molecular weight metabolites, lipoproteins and lipids) for the comparison of the controls and SARS-CoV-2 positive patients.** Only metabolites with significant p-values are shown in the table.

| Metabolite       | OPLS loadings | Cliff's delta | Adjusted p value       |
|------------------|---------------|---------------|------------------------|
| Formic acid      | 0.063         | 1.00          | 1.18x10 <sup>-43</sup> |
| PC (18:2/18:2)   | 0.085         | -0.94         | 4.48x10 <sup>-39</sup> |
| PE.O (16:0/20:4) | 0.073         | -0.94         | 4.48x10 <sup>-39</sup> |
| Asp:Glu/Asn:Gln  | 0.039         | 0.93          | 1.21x10 <sup>-38</sup> |
| Pyruvic acid     | 0.050         | 0.93          | 2.67x10 <sup>-38</sup> |
| PE.P (18:1/20:4) | 0.076         | -0.93         | 2.67x10 <sup>-38</sup> |
| PC (18:1/18:2)   | 0.085         | -0.92         | 5.41x10 <sup>-38</sup> |
| H4CH             | 0.069         | -0.92         | 8.87x10 <sup>-38</sup> |
| H4PL             | 0.071         | -0.92         | 1.08x10 <sup>-37</sup> |

|                    |       |       |                        |
|--------------------|-------|-------|------------------------|
| PE.P (18:1/18:2)   | 0.082 | -0.92 | 1.21x10 <sup>-37</sup> |
| PE.P (16:0/18:2)   | 0.082 | -0.91 | 2.00x10 <sup>-37</sup> |
| PE.P (16:0/22:5)   | 0.073 | -0.91 | 2.00x10 <sup>-37</sup> |
| PE.O (16:0/18:2)   | 0.074 | -0.91 | 2.60x10 <sup>-37</sup> |
| PE.P (18:1/20:4)   | 0.077 | -0.91 | 2.60x10 <sup>-37</sup> |
| LPC (18:2)         | 0.077 | -0.91 | 8.25x10 <sup>-37</sup> |
| PE.P (18:0/18:2)   | 0.079 | -0.90 | 8.25x10 <sup>-37</sup> |
| PE.P (18:0/22:5)   | 0.076 | -0.90 | 2.27x10 <sup>-36</sup> |
| PE.P (16:0/20:4)   | 0.074 | -0.90 | 3.76x10 <sup>-36</sup> |
| PC (18:2/20:3)     | 0.077 | -0.90 | 3.86x10 <sup>-36</sup> |
| PC (18:2/20:2)     | 0.076 | -0.89 | 5.52x10 <sup>-36</sup> |
| PE.P (18:2/18:2)   | 0.076 | -0.88 | 4.01x10 <sup>-35</sup> |
| Lactate/pyruvate   | 0.046 | -0.88 | 6.10x10 <sup>-35</sup> |
| PC (20:0/20:3)     | 0.075 | -0.88 | 6.10x10 <sup>-35</sup> |
| PE.P (18:0/18:1)   | 0.077 | -0.88 | 7.95x10 <sup>-35</sup> |
| HCER.d (18:0/18:0) | 0.074 | -0.88 | 8.72x10 <sup>-35</sup> |
| PE.O (16:0/20:1)   | 0.073 | -0.88 | 9.46x10 <sup>-35</sup> |
| H4A1               | 0.067 | -0.87 | 2.68x10 <sup>-34</sup> |
| PE.P (18:1/22:5)   | 0.074 | -0.87 | 2.95x10 <sup>-34</sup> |
| PE.O (16:0/22:5)   | 0.072 | -0.87 | 3.00x10 <sup>-34</sup> |
| PE.P (18:0/20:4)   | 0.073 | -0.87 | 3.40x10 <sup>-34</sup> |
| PE.P (16:0/20:1)   | 0.077 | -0.87 | 4.35x10 <sup>-34</sup> |
| PC (18:2/20:4)     | 0.079 | -0.87 | 4.81x10 <sup>-34</sup> |
| H4A2               | 0.067 | -0.86 | 6.21x10 <sup>-34</sup> |
| PE.P (16:0/18:3)   | 0.066 | -0.86 | 6.21x10 <sup>-34</sup> |
| PC (18:0/20:1)     | 0.076 | -0.86 | 6.96x10 <sup>-34</sup> |
| PE.O (18:0/22:5)   | 0.070 | -0.86 | 6.96x10 <sup>-34</sup> |
| LPC (20:0)         | 0.075 | -0.86 | 1.03x10 <sup>-33</sup> |
| PE.P (18:0/22:4)   | 0.069 | -0.86 | 1.22x10 <sup>-33</sup> |
| PE.O (16:0/18:1)   | 0.067 | -0.86 | 1.70x10 <sup>-33</sup> |
| PE.P (18:0/20:1)   | 0.074 | -0.85 | 4.02x10 <sup>-33</sup> |
| PE.P (18:0/20:3)   | 0.073 | -0.85 | 4.59x10 <sup>-33</sup> |
| PC (18:2/18:3)     | 0.063 | -0.84 | 2.40x10 <sup>-32</sup> |
| PE.P (18:0/16:0)   | 0.075 | -0.84 | 2.71x10 <sup>-32</sup> |
| PE.P (18:1/22:4)   | 0.062 | -0.84 | 4.30x10 <sup>-32</sup> |
| PE.P (18:0/20:2)   | 0.074 | -0.84 | 5.79x10 <sup>-32</sup> |
| PE.P (18:1/18:1)   | 0.063 | -0.84 | 6.28x10 <sup>-32</sup> |

|                    |       |       |                        |
|--------------------|-------|-------|------------------------|
| HCER (22:0)        | 0.069 | -0.83 | 8.56x10 <sup>-32</sup> |
| Glutamic acid      | 0.045 | 0.83  | 1.59x10 <sup>-31</sup> |
| HCER (26:0)        | 0.072 | -0.83 | 1.59x10 <sup>-31</sup> |
| Glutamic acid      | 0.046 | 0.83  | 1.69x10 <sup>-31</sup> |
| HCER.d (18:0/22:0) | 0.069 | -0.83 | 2.01x10 <sup>-31</sup> |
| PE.P (18:0/18:0)   | 0.071 | -0.83 | 3.79x10 <sup>-31</sup> |
| LDTG               | 0.048 | 0.83  | 4.06x10 <sup>-31</sup> |
| PC (20:0/18:1)     | 0.068 | -0.82 | 4.58x10 <sup>-31</sup> |
| PI (18:1/18:1)     | 0.068 | -0.82 | 7.43x10 <sup>-31</sup> |
| PI (20:0/18:2)     | 0.070 | -0.82 | 1.04x10 <sup>-30</sup> |
| PE.O (18:0/22:4)   | 0.052 | -0.81 | 2.46x10 <sup>-30</sup> |
| PC (18:2/22:6)     | 0.074 | -0.81 | 3.22x10 <sup>-30</sup> |
| HCER.d (18:0/24:0) | 0.069 | -0.81 | 3.25x10 <sup>-30</sup> |
| SM (20:0)          | 0.064 | -0.81 | 4.74x10 <sup>-30</sup> |
| HCER (24:0)        | 0.069 | -0.81 | 5.28x10 <sup>-30</sup> |
| PE.P (16:0/22:4)   | 0.057 | -0.81 | 5.45x10 <sup>-30</sup> |
| TPA2               | 0.065 | -0.81 | 7.21x10 <sup>-30</sup> |
| CER (26:0)         | 0.072 | -0.81 | 7.64x10 <sup>-30</sup> |
| PC (18:2/22:5)     | 0.072 | -0.80 | 1.55x10 <sup>-29</sup> |
| LPI (20:3)         | 0.062 | -0.80 | 1.73x10 <sup>-29</sup> |
| PE.P (18:1/20:1)   | 0.070 | -0.80 | 3.81x10 <sup>-29</sup> |
| PC (14:0/18:2)     | 0.071 | -0.79 | 7.22x10 <sup>-29</sup> |
| SM (24:0)          | 0.065 | -0.79 | 8.74x10 <sup>-29</sup> |
| PE.P (18:1/16:0)   | 0.034 | -0.79 | 1.98x10 <sup>-28</sup> |
| LPC (20:3)         | 0.069 | -0.79 | 2.02x10 <sup>-28</sup> |
| PC (16:1/18:2)     | 0.068 | -0.78 | 3.14x10 <sup>-28</sup> |
| PC (16:0/18:2)     | 0.071 | -0.78 | 4.28x10 <sup>-28</sup> |
| PI (18:1/20:4)     | 0.069 | -0.78 | 6.18x10 <sup>-28</sup> |
| PI (18:1/18:2)     | 0.067 | -0.78 | 6.55x10 <sup>-28</sup> |
| H4FC               | 0.062 | -0.78 | 6.60x10 <sup>-28</sup> |
| MAG (20:3)         | 0.015 | 0.78  | 7.44x10 <sup>-28</sup> |
| LPI (18:1)         | 0.058 | -0.78 | 8.17x10 <sup>-28</sup> |
| PC (18:2/20:5)     | 0.057 | -0.78 | 8.17x10 <sup>-28</sup> |
| LPC (18:1)         | 0.069 | -0.77 | 3.10x10 <sup>-27</sup> |
| SM (26:0)          | 0.064 | -0.77 | 3.17x10 <sup>-27</sup> |
| Aspartic acid      | 0.046 | 0.77  | 4.05x10 <sup>-27</sup> |
| DCER (24:0)        | 0.072 | -0.77 | 4.09x10 <sup>-27</sup> |

|                            |       |       |                        |
|----------------------------|-------|-------|------------------------|
| PI (18:0/20:3)             | 0.069 | -0.77 | 4.09x10 <sup>-27</sup> |
| HDA2                       | 0.063 | -0.77 | 4.99x10 <sup>-27</sup> |
| PE.P (16:0/20:5)           | 0.060 | -0.76 | 7.34x10 <sup>-27</sup> |
| PE.P (16:0/18:1)           | 0.063 | -0.76 | 8.05x10 <sup>-27</sup> |
| HDA1                       | 0.066 | -0.76 | 1.29x10 <sup>-26</sup> |
| PC (18:1/20:3)             | 0.070 | -0.75 | 3.20x10 <sup>-26</sup> |
| PE.O (16:0/22:4)           | 0.056 | -0.75 | 3.59x10 <sup>-26</sup> |
| PC (14:0/20:4)             | 0.066 | -0.75 | 4.26x10 <sup>-26</sup> |
| HCER (20:0)                | 0.059 | -0.75 | 4.62x10 <sup>-26</sup> |
| PC (14:0/18:3)             | 0.050 | -0.75 | 8.38x10 <sup>-26</sup> |
| LPC (18:3)                 | 0.060 | -0.75 | 8.78x10 <sup>-26</sup> |
| Neopterin/tryptophan       | 0.024 | 0.71  | 1.49x10 <sup>-25</sup> |
| MAG (20:4)                 | 0.015 | 0.74  | 1.52x10 <sup>-25</sup> |
| TPA1                       | 0.066 | -0.74 | 1.68x10 <sup>-25</sup> |
| PC (18:2/16:1)             | 0.065 | -0.74 | 1.68x10 <sup>-25</sup> |
| PC (16:0/20:1)             | 0.068 | -0.74 | 1.69x10 <sup>-25</sup> |
| Fisher's ratio             | 0.046 | -0.74 | 2.07x10 <sup>-25</sup> |
| PI (20:0/20:4)             | 0.065 | -0.74 | 2.27x10 <sup>-25</sup> |
| PC (20:0/20:4)             | 0.067 | -0.74 | 2.38x10 <sup>-25</sup> |
| PC (18:0/20:2)             | 0.069 | -0.74 | 4.68x10 <sup>-25</sup> |
| PI (18:1/20:3)             | 0.063 | -0.73 | 5.49x10 <sup>-25</sup> |
| LPI (18:2)                 | 0.049 | -0.73 | 5.56x10 <sup>-25</sup> |
| PC (14:0/22:6)             | 0.065 | -0.73 | 1.10x10 <sup>-24</sup> |
| PC (18:0/18:2)             | 0.068 | -0.73 | 1.44x10 <sup>-24</sup> |
| H3FC                       | 0.062 | -0.72 | 2.53x10 <sup>-24</sup> |
| Quinolinic acid/tryptophan | 0.016 | 0.72  | 3.12x10 <sup>-24</sup> |
| PE.P (18:1/20:3)           | 0.062 | -0.72 | 3.79x10 <sup>-24</sup> |
| PE.P (18:1/20:5)           | 0.055 | -0.72 | 6.03x10 <sup>-24</sup> |
| PS (20:0/18:2)             | 0.065 | -0.72 | 6.67x10 <sup>-24</sup> |
| LPC (20:2)                 | 0.067 | -0.72 | 7.30x10 <sup>-24</sup> |
| LPI (20:4)                 | 0.048 | -0.72 | 8.16x10 <sup>-24</sup> |
| PG (20:0/18:2)             | 0.056 | -0.72 | 8.18x10 <sup>-24</sup> |
| PE.O (16:0/22:6)           | 0.055 | -0.71 | 8.75x10 <sup>-24</sup> |
| CER (24:0)                 | 0.066 | -0.71 | 9.16x10 <sup>-24</sup> |
| DCER (26:0)                | 0.062 | -0.71 | 1.48x10 <sup>-23</sup> |
| PI (18:2/18:2)             | 0.051 | -0.71 | 1.49x10 <sup>-23</sup> |
| HCER (14:0)                | 0.057 | -0.71 | 1.61x10 <sup>-23</sup> |

|                    |       |       |                        |
|--------------------|-------|-------|------------------------|
| HDCH               | 0.061 | -0.71 | 2.04x10 <sup>-23</sup> |
| PC (18:1/20:1)     | 0.061 | -0.71 | 2.39x10 <sup>-23</sup> |
| PS (18:0/18:0)     | 0.041 | 0.71  | 2.40x10 <sup>-23</sup> |
| PC (14:0/20:3)     | 0.062 | -0.71 | 2.71x10 <sup>-23</sup> |
| LPE (18:2)         | 0.052 | -0.70 | 4.36x10 <sup>-23</sup> |
| Phenylalanine      | 0.046 | 0.70  | 6.63x10 <sup>-23</sup> |
| H2TG               | 0.038 | 0.70  | 6.63x10 <sup>-23</sup> |
| PC (18:1/18:3)     | 0.049 | -0.70 | 8.92x10 <sup>-23</sup> |
| CE (16:0)          | 0.060 | -0.70 | 9.44x10 <sup>-23</sup> |
| H3CH               | 0.061 | -0.70 | 1.18x10 <sup>-22</sup> |
| L4TG               | 0.042 | 0.70  | 1.27x10 <sup>-22</sup> |
| PE.P (16:0/20:3)   | 0.059 | -0.69 | 1.75x10 <sup>-22</sup> |
| PE.P (16:0/16:1)   | 0.054 | -0.69 | 1.99x10 <sup>-22</sup> |
| PE.P (18:1/20:2)   | 0.063 | -0.69 | 2.55x10 <sup>-22</sup> |
| MAG (18:1)         | 0.015 | 0.69  | 2.81x10 <sup>-22</sup> |
| PC (14:0/18:1)     | 0.058 | -0.68 | 6.84x10 <sup>-22</sup> |
| SM (14:0)          | 0.063 | -0.68 | 7.59x10 <sup>-22</sup> |
| PC (20:0/22:5)     | 0.057 | -0.68 | 2.20x10 <sup>-21</sup> |
| DCER (26:1)        | 0.060 | -0.67 | 2.36x10 <sup>-21</sup> |
| HCER.d (18:0/20:0) | 0.055 | -0.67 | 2.36x10 <sup>-21</sup> |
| PI (18:0/20:4)     | 0.061 | -0.67 | 2.36x10 <sup>-21</sup> |
| PC (14:0/20:5)     | 0.049 | -0.67 | 3.20x10 <sup>-21</sup> |
| Histidine          | 0.046 | -0.67 | 3.34x10 <sup>-21</sup> |
| CE (18:1)          | 0.057 | -0.67 | 4.03x10 <sup>-21</sup> |
| PC (18:0/20:3)     | 0.063 | -0.67 | 4.09x10 <sup>-21</sup> |
| PE.P (18:1/18:0)   | 0.055 | -0.67 | 5.09x10 <sup>-21</sup> |
| LCER (24:0)        | 0.054 | -0.67 | 5.37x10 <sup>-21</sup> |
| L1TG               | 0.037 | 0.67  | 5.50x10 <sup>-21</sup> |
| L5TG               | 0.041 | 0.67  | 5.69x10 <sup>-21</sup> |
| Quinolinic acid    | 0.020 | 0.67  | 6.90x10 <sup>-21</sup> |
| PC (18:1/22:4)     | 0.056 | -0.66 | 1.00x10 <sup>-20</sup> |
| CE (18:3)          | 0.050 | -0.66 | 1.11x10 <sup>-20</sup> |
| PS (18:0/20:4)     | 0.047 | -0.66 | 1.29x10 <sup>-20</sup> |
| Neopterin          | 0.026 | 0.66  | 1.39x10 <sup>-20</sup> |
| CER (18:0)         | 0.036 | 0.66  | 2.41x10 <sup>-20</sup> |
| PC (14:0/14:0)     | 0.040 | -0.66 | 2.90x10 <sup>-20</sup> |
| CE (14:0)          | 0.053 | -0.65 | 3.66x10 <sup>-20</sup> |

|                    |       |       |                        |
|--------------------|-------|-------|------------------------|
| Citrulline         | 0.042 | -0.65 | 4.91x10 <sup>-20</sup> |
| L2TG               | 0.041 | 0.65  | 5.56x10 <sup>-20</sup> |
| PC (14:0/22:5)     | 0.053 | -0.65 | 5.69x10 <sup>-20</sup> |
| PC (16:0/18:0)     | 0.019 | -0.65 | 6.19x10 <sup>-20</sup> |
| HDPL               | 0.058 | -0.65 | 7.11x10 <sup>-20</sup> |
| LPE (20:3)         | 0.042 | -0.65 | 9.47x10 <sup>-20</sup> |
| PE (18:2/16:1)     | 0.055 | -0.65 | 1.24x10 <sup>-19</sup> |
| LPC (20:4)         | 0.057 | -0.64 | 2.25x10 <sup>-19</sup> |
| LPC (22:5)         | 0.055 | -0.64 | 3.79x10 <sup>-19</sup> |
| PC (16:0/20:3)     | 0.063 | -0.64 | 4.08x10 <sup>-19</sup> |
| H3PL               | 0.055 | -0.64 | 4.49x10 <sup>-19</sup> |
| H3A1               | 0.058 | -0.63 | 7.57x10 <sup>-19</sup> |
| PG (20:0/20:3)     | 0.038 | -0.63 | 8.70x10 <sup>-19</sup> |
| PE.P (18:0/20:5)   | 0.051 | -0.63 | 1.12x10 <sup>-19</sup> |
| LCER.d (18:0/22:0) | 0.052 | -0.63 | 1.44x10 <sup>-18</sup> |
| PC (18:0/18:1)     | 0.049 | -0.63 | 1.44x10 <sup>-18</sup> |
| CE (22:0)          | 0.053 | -0.63 | 1.44x10 <sup>-18</sup> |
| PC (18:0/18:0)     | 0.050 | -0.63 | 1.51x10 <sup>-18</sup> |
| PS (20:0/18:3)     | 0.049 | -0.63 | 1.51x10 <sup>-18</sup> |
| LPC (18:0)         | 0.062 | -0.62 | 1.87x10 <sup>-18</sup> |
| CE (24:0)          | 0.047 | -0.62 | 2.09x10 <sup>-18</sup> |
| LPE (20:4)         | 0.045 | -0.62 | 3.38x10 <sup>-18</sup> |
| LCER.d (18:0/24:0) | 0.051 | -0.62 | 3.52x10 <sup>-18</sup> |
| PS (20:0/20:4)     | 0.057 | -0.62 | 4.75x10 <sup>-18</sup> |
| DCER (22:0)        | 0.052 | -0.62 | 5.19x10 <sup>-18</sup> |
| PC (14:0/22:4)     | 0.049 | -0.61 | 6.72x10 <sup>-18</sup> |
| PS (20:0/20:5)     | 0.047 | -0.61 | 6.94x10 <sup>-18</sup> |
| PE.O (18:0/18:2)   | 0.039 | -0.61 | 1.07x10 <sup>-17</sup> |
| VLPN               | 0.032 | 0.61  | 1.35x10 <sup>-17</sup> |
| VLAB               | 0.032 | 0.61  | 1.35x10 <sup>-17</sup> |
| ABA1               | 0.040 | 0.61  | 1.51x10 <sup>-17</sup> |
| LPC (22:4)         | 0.052 | -0.61 | 1.57x10 <sup>-17</sup> |
| PG (18:0/18:2)     | 0.049 | -0.60 | 2.60x10 <sup>-17</sup> |
| PC (18:1/22:6)     | 0.057 | -0.60 | 2.78x10 <sup>-17</sup> |
| PC (18:0/22:4)     | 0.052 | -0.60 | 3.27x10 <sup>-17</sup> |
| DCER (22:1)        | 0.050 | -0.60 | 3.91x10 <sup>-17</sup> |
| V4TG               | 0.033 | 0.60  | 4.83x10 <sup>-17</sup> |

|                       |        |       |                        |
|-----------------------|--------|-------|------------------------|
| PI (16:0/20:3)        | 0.053  | -0.60 | $5.15 \times 10^{-17}$ |
| PI (18:0/20:2)        | 0.042  | -0.59 | $6.92 \times 10^{-17}$ |
| LPE (18:1)            | 0.051  | -0.59 | $7.48 \times 10^{-17}$ |
| PE (18:2/20:4)        | 0.054  | -0.59 | $1.03 \times 10^{-16}$ |
| PE (18:2/18:2)        | 0.053  | -0.59 | $1.19 \times 10^{-16}$ |
| Glutamine             | 0.037  | -0.59 | $1.27 \times 10^{-16}$ |
| LPC (22:6)            | 0.050  | -0.59 | $1.40 \times 10^{-16}$ |
| PG (18:0/18:1)        | 0.051  | -0.59 | $1.71 \times 10^{-16}$ |
| SM (20:1)             | 0.050  | -0.59 | $1.91 \times 10^{-16}$ |
| PC (16:0/20:4)        | 0.053  | -0.59 | $1.96 \times 10^{-16}$ |
| PC (14:0/20:2)        | 0.051  | -0.59 | $2.07 \times 10^{-16}$ |
| PC (18:1/18:1)        | 0.050  | -0.58 | $2.26 \times 10^{-16}$ |
| LPE (18:3)            | 0.028  | -0.58 | $2.52 \times 10^{-16}$ |
| PI (18:0/18:1)        | 0.050  | -0.58 | $3.01 \times 10^{-16}$ |
| CE (18:0)             | 0.052  | -0.58 | $4.67 \times 10^{-16}$ |
| SM (24:1)             | 0.051  | -0.58 | $5.75 \times 10^{-16}$ |
| HCER.d (18:0/26:0)    | 0.045  | -0.58 | $5.78 \times 10^{-16}$ |
| PG (18:1/16:1)        | 0.045  | 0.58  | $6.63 \times 10^{-16}$ |
| MAG (22:5)            | 0.013  | 0.58  | $6.77 \times 10^{-16}$ |
| V3TG                  | 0.027  | 0.57  | $1.40 \times 10^{-15}$ |
| CE (20:2)             | 0.053  | -0.57 | $1.51 \times 10^{-15}$ |
| PE.P (16:0/22:6)      | 0.050  | -0.57 | $1.51 \times 10^{-15}$ |
| LPE (20:1)            | 0.049  | -0.57 | $1.91 \times 10^{-15}$ |
| PI (16:0/20:4)        | 0.047  | -0.56 | $4.21 \times 10^{-15}$ |
| PC (16:0/22:4)        | -0.050 | -0.56 | $4.85 \times 10^{-15}$ |
| V2FC                  | 0.025  | 0.56  | $5.15 \times 10^{-15}$ |
| H1TG                  | 0.027  | 0.55  | $7.66 \times 10^{-15}$ |
| PI (18:0/22:4)        | 0.049  | -0.55 | $1.04 \times 10^{-14}$ |
| PG (20:0/20:5)        | 0.035  | -0.55 | $1.11 \times 10^{-14}$ |
| LPE (20:2)            | 0.041  | -0.55 | $1.15 \times 10^{-14}$ |
| LCER (14:0)           | 0.042  | -0.55 | $1.66 \times 10^{-14}$ |
| CE (20:3)             | 0.053  | -0.54 | $2.30 \times 10^{-14}$ |
| L6TG                  | 0.035  | 0.54  | $2.54 \times 10^{-14}$ |
| HDFC                  | 0.050  | -0.54 | $2.94 \times 10^{-14}$ |
| LPC (20:5)            | 0.040  | -0.54 | $3.71 \times 10^{-14}$ |
| Kynurenine/tryptophan | 0.033  | 0.54  | $3.84 \times 10^{-14}$ |
| PS (20:0/22:6)        | 0.051  | -0.54 | $4.10 \times 10^{-14}$ |

|                     |        |       |                        |
|---------------------|--------|-------|------------------------|
| SM (22:1)           | 0.044  | -0.54 | 4.70x10 <sup>-14</sup> |
| PG (18:0/20:0)      | 0.036  | 0.54  | 4.80x10 <sup>-14</sup> |
| PC (18:2/20:1)      | 0.042  | -0.53 | 1.08x10 <sup>-13</sup> |
| PE.O (18:0/20:4)    | 0.040  | -0.53 | 1.13x10 <sup>-13</sup> |
| PC (16:0/20:5)      | 0.040  | -0.53 | 1.18x10 <sup>-13</sup> |
| V3FC                | 0.024  | 0.53  | 1.42x10 <sup>-13</sup> |
| MAG (22:4)          | 0.014  | 0.53  | 1.51x10 <sup>-13</sup> |
| PI (20:0/16:1)      | 0.050  | -0.53 | 1.52x10 <sup>-13</sup> |
| PC (16:0/14:0)      | 0.040  | -0.53 | 1.57x10 <sup>-13</sup> |
| CE (20:1)           | 0.037  | -0.52 | 2.48x10 <sup>-13</sup> |
| MAG (16:0)          | 0.012  | 0.52  | 2.88x10 <sup>-13</sup> |
| PI (16:0/18:1)      | 0.045  | -0.52 | 3.00x10 <sup>-13</sup> |
| PC (16:1/18:1)      | 0.036  | -0.52 | 3.29x10 <sup>-13</sup> |
| MAG (18:2)          | 0.013  | 0.52  | 5.34x10 <sup>-13</sup> |
| H2A1                | 0.048  | -0.51 | 6.06x10 <sup>-13</sup> |
| LCER (16:0)         | 0.038  | -0.51 | 8.86x10 <sup>-13</sup> |
| PG (18:1/18:2)      | 0.035  | 0.51  | 9.70x10 <sup>-13</sup> |
| PC (18:0/14:0)      | 0.044  | -0.51 | 1.05x10 <sup>-12</sup> |
| PE.P (16:0/18:0)    | 0.044  | -0.51 | 1.22x10 <sup>-12</sup> |
| Threonine           | 0.027  | -0.51 | 1.24x10 <sup>-12</sup> |
| 3-Hydroxykynurenine | 0.022  | 0.47  | 1.42x10 <sup>-12</sup> |
| H3TG                | 0.024  | 0.51  | 1.53x10 <sup>-12</sup> |
| PG (20:0/20:1)      | 0.047  | -0.51 | 1.58x10 <sup>-12</sup> |
| PC (16:0/22:6)      | 0.049  | -0.51 | 1.61x10 <sup>-12</sup> |
| LPC (14:0)          | 0.046  | -0.50 | 1.87x10 <sup>-12</sup> |
| PI (16:0/20:2)      | 0.047  | -0.50 | 1.95x10 <sup>-12</sup> |
| Lactic acid         | 0.030  | 0.50  | 2.42x10 <sup>-12</sup> |
| PE (18:1/18:2)      | 0.036  | -0.50 | 2.38x10 <sup>-12</sup> |
| HCER.d (18:0/26:1)  | 0.032  | -0.50 | 2.45x10 <sup>-12</sup> |
| V4PL                | 0.031  | 0.50  | 2.96x10 <sup>-12</sup> |
| HCER (22:1)         | -0.037 | -0.50 | 2.95x10 <sup>-12</sup> |
| LPC (20:1)          | 0.051  | -0.50 | 3.23x10 <sup>-12</sup> |
| PC (16:0/18:3)      | 0.026  | -0.50 | 3.96x10 <sup>-12</sup> |
| PC (16:0/18:1)      | 0.040  | -0.50 | 4.32x10 <sup>-12</sup> |
| H3A2                | 0.046  | -0.49 | 6.54x10 <sup>-12</sup> |
| PI (18:0/20:0)      | 0.039  | 0.49  | 6.54x10 <sup>-12</sup> |
| PC (18:1/20:4)      | 0.046  | -0.49 | 7.01x10 <sup>-12</sup> |

|                    |       |       |                        |
|--------------------|-------|-------|------------------------|
| V2TG               | 0.018 | 0.49  | $7.88 \times 10^{-12}$ |
| PE.P (18:1/22:6)   | 0.047 | -0.49 | $1.14 \times 10^{-11}$ |
| TPCH               | 0.048 | -0.48 | $1.48 \times 10^{-11}$ |
| CE (22:5)          | 0.043 | -0.48 | $1.51 \times 10^{-11}$ |
| LCER (26:1)        | 0.041 | -0.48 | $1.85 \times 10^{-11}$ |
| PS (20:0/22:5)     | 0.049 | -0.48 | $3.29 \times 10^{-11}$ |
| MAG (16:1)         | 0.011 | 0.47  | $5.62 \times 10^{-11}$ |
| TPTG               | 0.013 | 0.47  | $5.75 \times 10^{-11}$ |
| Glucose            | 0.024 | 0.47  | $5.94 \times 10^{-11}$ |
| LCER (24:1)        | 0.037 | -0.47 | $5.94 \times 10^{-11}$ |
| V3PL               | 0.025 | 0.47  | $6.29 \times 10^{-11}$ |
| Methionine         | 0.016 | -0.47 | $7.06 \times 10^{-11}$ |
| HDTG               | 0.021 | 0.47  | $7.51 \times 10^{-11}$ |
| PE (18:1/18:3)     | 0.029 | -0.46 | $1.31 \times 10^{-10}$ |
| L3TG               | 0.031 | 0.46  | $1.52 \times 10^{-10}$ |
| H1FC               | 0.043 | -0.46 | $1.71 \times 10^{-10}$ |
| PC (16:0/20:2)     | 0.045 | -0.46 | $1.88 \times 10^{-10}$ |
| MAG (22:6)         | 0.012 | 0.46  | $2.04 \times 10^{-10}$ |
| HCER (26:1)        | 0.036 | -0.45 | $2.71 \times 10^{-10}$ |
| CE (20:0)          | 0.035 | -0.45 | $2.74 \times 10^{-10}$ |
| PE.P (18:0/22:6)   | 0.042 | -0.45 | $3.55 \times 10^{-10}$ |
| HCER.d (18:0/24:1) | 0.034 | -0.45 | $3.99 \times 10^{-10}$ |
| V5TG               | 0.024 | 0.45  | $5.21 \times 10^{-10}$ |
| HCER (18:0)        | 0.032 | -0.44 | $6.39 \times 10^{-10}$ |
| PC (16:0/22:5)     | 0.042 | -0.44 | $7.67 \times 10^{-10}$ |
| SM (18:1)          | 0.042 | -0.44 | $9.01 \times 10^{-10}$ |
| SM (26:1)          | 0.035 | -0.44 | $1.00 \times 10^{-9}$  |
| L4CH               | 0.041 | -0.44 | $1.26 \times 10^{-9}$  |
| MAG (20:2)         | 0.011 | 0.43  | $1.57 \times 10^{-9}$  |
| H2FC               | 0.039 | -0.43 | $1.62 \times 10^{-9}$  |
| L1CH               | 0.028 | -0.43 | $1.77 \times 10^{-9}$  |
| PS (20:0/20:3)     | 0.040 | -0.43 | $1.82 \times 10^{-9}$  |
| CE (20:5)          | 0.035 | -0.43 | $2.84 \times 10^{-9}$  |
| Tryptophan         | 0.033 | -0.42 | $4.02 \times 10^{-9}$  |
| V3CH               | 0.023 | 0.42  | $4.15 \times 10^{-9}$  |
| DAG (16:0/20:4)    | 0.008 | 0.42  | $4.43 \times 10^{-9}$  |
| LPE (16:1)         | 0.025 | -0.42 | $6.29 \times 10^{-9}$  |

|                       |       |       |                       |
|-----------------------|-------|-------|-----------------------|
| PE.O (18:0/22:6)      | 0.037 | -0.41 | 8.67x10 <sup>-9</sup> |
| CER (22:1)            | 0.022 | 0.41  | 9.89x10 <sup>-9</sup> |
| V4FC                  | 0.026 | 0.41  | 1.21x10 <sup>-8</sup> |
| VLTG                  | 0.010 | 0.41  | 1.34x10 <sup>-8</sup> |
| PE (18:0/22:6)        | 0.015 | 0.41  | 1.38x10 <sup>-8</sup> |
| PE (18:2/18:3)        | 0.020 | -0.41 | 1.39x10 <sup>-8</sup> |
| LPE (22:4)            | 0.021 | -0.41 | 1.41x10 <sup>-8</sup> |
| LPC (16:0)            | 0.046 | -0.41 | 1.46x10 <sup>-8</sup> |
| V2PL                  | 0.016 | 0.41  | 1.74x10 <sup>-8</sup> |
| Acetone               | 0.015 | 0.40  | 1.96x10 <sup>-8</sup> |
| LDCH                  | 0.037 | -0.40 | 2.88x10 <sup>-8</sup> |
| CER (14:0)            | 0.040 | -0.40 | 3.99x10 <sup>-8</sup> |
| DAG (16:0/18:1)       | 0.007 | 0.40  | 4.05x10 <sup>-8</sup> |
| PE.P (16:0/16:0)      | 0.033 | -0.39 | 5.80x10 <sup>-8</sup> |
| 3-Hydroxybutyric acid | 0.022 | 0.39  | 6.03x10 <sup>-8</sup> |
| FFA (24:0)            | 0.033 | -0.39 | 6.05x10 <sup>-8</sup> |
| PI (18:1/16:1)        | 0.032 | -0.39 | 7.33x10 <sup>-8</sup> |
| Kynurenic acid        | 0.011 | -0.39 | 8.31x10 <sup>-8</sup> |
| LCER (18:1)           | 0.028 | -0.39 | 8.90x10 <sup>-8</sup> |
| IDPN                  | 0.025 | 0.39  | 8.98x10 <sup>-8</sup> |
| IDAB                  | 0.025 | 0.39  | 9.00x10 <sup>-8</sup> |
| VLCH                  | 0.016 | 0.39  | 9.20x10 <sup>-8</sup> |
| PC (18:1/20:5)        | 0.024 | -0.39 | 9.86x10 <sup>-8</sup> |
| HCER (24:1)           | 0.032 | -0.38 | 1.08x10 <sup>-7</sup> |
| PE (16:0/18:1)        | 0.012 | 0.38  | 1.09x10 <sup>-7</sup> |
| PS (20:0/22:4)        | 0.027 | -0.38 | 1.16x10 <sup>-7</sup> |
| DCER (18:0)           | 0.025 | 0.38  | 1.17x10 <sup>-7</sup> |
| LPC (16:1)            | 0.035 | -0.38 | 1.26x10 <sup>-7</sup> |
| LPG (18:1)            | 0.025 | -0.38 | 1.34x10 <sup>-7</sup> |
| PE.P (18:0/16:1)      | 0.037 | -0.38 | 1.84x10 <sup>-7</sup> |
| L4PL                  | 0.037 | -0.38 | 2.00x10 <sup>-7</sup> |
| PG (18:1/20:4)        | 0.028 | 0.38  | 2.18x10 <sup>-7</sup> |
| DAG (18:1/20:4)       | 0.011 | 0.37  | 2.43x10 <sup>-7</sup> |
| DAG (16:0/22:6)       | 0.008 | 0.37  | 2.46x10 <sup>-7</sup> |
| PS (18:0/18:1)        | 0.013 | 0.37  | 2.66x10 <sup>-7</sup> |
| TAG (55:5)_FA (20:4)  | 0.008 | 0.37  | 2.70x10 <sup>-7</sup> |
| 3-Hydroxykynurenine   | 0.019 | 0.37  | 3.60x10 <sup>-7</sup> |

|                      |       |       |                       |
|----------------------|-------|-------|-----------------------|
| V2CH                 | 0.015 | 0.37  | $3.84 \times 10^{-7}$ |
| L4FC                 | 0.037 | -0.37 | $4.70 \times 10^{-7}$ |
| PE (18:0/22:4)       | 0.025 | -0.36 | $5.13 \times 10^{-7}$ |
| PE (18:1/20:4)       | 0.031 | -0.36 | $5.47 \times 10^{-7}$ |
| PI (16:0/22:4)       | 0.032 | -0.36 | $6.05 \times 10^{-7}$ |
| MAG (18:0)           | 0.017 | 0.36  | $7.02 \times 10^{-7}$ |
| V4CH                 | 0.025 | 0.36  | $7.26 \times 10^{-7}$ |
| LPE (22:5)           | 0.013 | -0.36 | $7.64 \times 10^{-7}$ |
| L3CH                 | 0.032 | -0.36 | $8.91 \times 10^{-7}$ |
| PI (18:0/18:3)       | 0.023 | -0.36 | $8.99 \times 10^{-7}$ |
| PI (16:0/18:2)       | 0.034 | -0.35 | $1.10 \times 10^{-6}$ |
| PI (18:0/18:2)       | 0.036 | -0.35 | $1.35 \times 10^{-6}$ |
| TAG (54:4)_FA (20:4) | 0.010 | 0.35  | $1.40 \times 10^{-6}$ |
| TAG (54:5)_FA (20:4) | 0.013 | 0.35  | $1.53 \times 10^{-6}$ |
| PC (18:1/22:5)       | 0.036 | -0.35 | $2.02 \times 10^{-6}$ |
| LPE (16:0)           | 0.029 | -0.34 | $2.90 \times 10^{-6}$ |
| PC (18:0/18:3)       | 0.011 | -0.34 | $2.99 \times 10^{-6}$ |
| CER (20:1)           | 0.019 | 0.34  | $3.23 \times 10^{-6}$ |
| CER (22:0)           | 0.032 | -0.34 | $3.43 \times 10^{-6}$ |
| DAG (16:0/18:2)      | 0.002 | 0.33  | $4.63 \times 10^{-6}$ |
| LCER (20:0)          | 0.027 | -0.33 | $5.13 \times 10^{-6}$ |
| DAG (18:2/22:4)      | 0.007 | 0.33  | $5.14 \times 10^{-6}$ |
| HCER (16:0)          | 0.026 | -0.33 | $5.29 \times 10^{-6}$ |
| CE (22:4)            | 0.026 | -0.33 | $5.39 \times 10^{-6}$ |
| PG (20:0/22:5)       | 0.012 | -0.33 | $5.69 \times 10^{-6}$ |
| TAG (54:5)_FA (16:0) | 0.007 | 0.33  | $5.91 \times 10^{-6}$ |
| TAG (52:4)_FA (20:4) | 0.006 | 0.32  | $1.06 \times 10^{-5}$ |
| PI (20:0/18:1)       | 0.022 | -0.32 | $1.10 \times 10^{-5}$ |
| PE (18:1/20:3)       | 0.028 | -0.32 | $1.18 \times 10^{-5}$ |
| TAG (56:6)_FA (18:0) | 0.012 | 0.32  | $1.23 \times 10^{-5}$ |
| TAG (54:6)_FA (20:4) | 0.008 | 0.32  | $1.25 \times 10^{-5}$ |
| TAG (56:5)_FA (20:4) | 0.014 | 0.32  | $1.30 \times 10^{-5}$ |
| VLFC                 | 0.011 | 0.32  | $1.44 \times 10^{-5}$ |
| TAG (54:6)_FA (16:0) | 0.004 | 0.31  | $1.98 \times 10^{-5}$ |
| IDTG                 | 0.003 | 0.31  | $2.54 \times 10^{-5}$ |
| CER (20:0)           | 0.013 | 0.31  | $2.56 \times 10^{-5}$ |
| DAG (18:1/22:4)      | 0.007 | 0.31  | $2.68 \times 10^{-5}$ |

|                      |       |       |                       |
|----------------------|-------|-------|-----------------------|
| DAG (16:0/16:0)      | 0.004 | 0.31  | 2.78x10 <sup>-5</sup> |
| V1TG                 | 0.001 | 0.31  | 2.89x10 <sup>-5</sup> |
| LDPL                 | 0.029 | -0.31 | 2.91x10 <sup>-5</sup> |
| DAG (18:2/20:4)      | 0.006 | 0.31  | 2.93x10 <sup>-5</sup> |
| TAG (54:4)_FA (22:4) | 0.002 | 0.30  | 3.57x10 <sup>-5</sup> |
| TAG (56:5)_FA (18:0) | 0.012 | 0.30  | 3.77x10 <sup>-5</sup> |
| PI (16:0/18:0)       | 0.027 | -0.30 | 4.40x10 <sup>-5</sup> |
| TAG (58:7)_FA (18:0) | 0.006 | 0.30  | 4.43x10 <sup>-5</sup> |
| PG (18:1/20:2)       | 0.027 | -0.30 | 4.77x10 <sup>-5</sup> |
| CE (16:1)            | 0.024 | -0.30 | 5.97x10 <sup>-5</sup> |
| PC (16:0/16:1)       | 0.023 | -0.29 | 6.60x10 <sup>-5</sup> |
| SM (18:0)            | 0.024 | -0.29 | 6.88x10 <sup>-5</sup> |
| TAG (56:4)_FA (20:4) | 0.009 | 0.29  | 6.88x10 <sup>-5</sup> |
| DAG (18:1/22:6)      | 0.008 | 0.29  | 8.08x10 <sup>-5</sup> |
| H2A2                 | 0.029 | -0.29 | 8.36x10 <sup>-5</sup> |
| TAG (58:6)_FA (18:0) | 0.003 | 0.29  | 8.82x10 <sup>-5</sup> |
| PI (18:0/20:5)       | 0.014 | -0.29 | 9.04x10 <sup>-5</sup> |
| DAG (16:0/20:5)      | 0.004 | 0.29  | 1.05x10 <sup>-4</sup> |
| CER (24:1)           | 0.009 | 0.29  | 1.09x10 <sup>-4</sup> |
| Citric acid          | 0.020 | 0.28  | 1.10x10 <sup>-4</sup> |
| L3PL                 | 0.026 | -0.28 | 1.19x10 <sup>-4</sup> |
| DAG (16:0/22:5)      | 0.005 | 0.28  | 1.21x10 <sup>-4</sup> |
| TAG (54:5)_FA (22:5) | 0.003 | 0.28  | 1.29x10 <sup>-4</sup> |
| Asparagine           | 0.010 | -0.28 | 1.34x10 <sup>-4</sup> |
| MAG (14:0)           | 0.008 | 0.28  | 1.43x10 <sup>-4</sup> |
| PG (18:2/16:1)       | 0.028 | 0.28  | 1.59x10 <sup>-4</sup> |
| H2CH                 | 0.031 | -0.28 | 1.59x10 <sup>-4</sup> |
| FFA (20:4)           | 0.008 | 0.28  | 1.59x10 <sup>-4</sup> |
| PI (18:0/22:5)       | 0.030 | -0.28 | 1.61x10 <sup>-4</sup> |
| V1PL                 | 0.001 | 0.28  | 1.72x10 <sup>-4</sup> |
| VLPL                 | 0.009 | 0.28  | 1.92x10 <sup>-4</sup> |
| LDLC                 | 0.027 | -0.27 | 2.18x10 <sup>-4</sup> |
| PG (20:0/20:4)       | 0.011 | -0.27 | 2.24x10 <sup>-4</sup> |
| PS (20:0/16:1)       | 0.015 | -0.27 | 2.42x10 <sup>-4</sup> |
| L1FC                 | 0.018 | -0.27 | 2.53x10 <sup>-4</sup> |
| TAG (53:5)_FA (20:4) | 0.002 | 0.27  | 2.74x10 <sup>-4</sup> |
| DAG (18:0/18:1)      | 0.004 | 0.27  | 2.89x10 <sup>-4</sup> |

|                      |       |       |                       |
|----------------------|-------|-------|-----------------------|
| TAG (58:8)_FA (20:3) | 0.030 | -0.27 | 3.20x10 <sup>-4</sup> |
| Indole-3-acetic acid | 0.008 | -0.26 | 3.63x10 <sup>-4</sup> |
| TAG (56:6)_FA (20:4) | 0.006 | 0.26  | 3.66x10 <sup>-4</sup> |
| L4PN                 | 0.028 | -0.26 | 4.34x10 <sup>-4</sup> |
| IDCH                 | 0.014 | 0.26  | 4.34x10 <sup>-4</sup> |
| L1PL                 | 0.013 | -0.26 | 4.34x10 <sup>-4</sup> |
| L4AB                 | 0.028 | -0.26 | 4.34x10 <sup>-4</sup> |
| CER (16:0)           | 0.013 | 0.26  | 4.43x10 <sup>-4</sup> |
| MAG (18:3)           | 0.010 | 0.26  | 4.63x10 <sup>-4</sup> |
| DAG (16:0/16:1)      | 0.001 | 0.26  | 4.74x10 <sup>-4</sup> |
| CE (22:2)            | 0.023 | -0.26 | 5.08x10 <sup>-4</sup> |
| Kynurenine           | 0.021 | 0.25  | 6.21x10 <sup>-4</sup> |
| PE (16:0/20:5)       | 0.020 | -0.25 | 6.29x10 <sup>-4</sup> |
| CE (22:6)            | 0.028 | -0.25 | 6.33x10 <sup>-4</sup> |
| PI (16:0_22:6)       | 0.025 | -0.25 | 6.34x10 <sup>-4</sup> |
| TAG (58:6)_FA (22:4) | 0.004 | 0.25  | 7.31x10 <sup>-4</sup> |
| Creatine             | 0.015 | 0.25  | 7.31x10 <sup>-4</sup> |
| TAG (51:1)_FA (18:1) | 0.001 | 0.25  | 8.20x10 <sup>-4</sup> |
| DAG (18:1/18:1)      | 0.004 | 0.25  | 8.28x10 <sup>-4</sup> |
| DAG (16:1/20:4)      | 0.004 | 0.25  | 8.99x10 <sup>-4</sup> |
| L2CH                 | 0.016 | -0.24 | 1.10x10 <sup>-3</sup> |
| TAG (50:1)_FA (18:1) | 0.006 | 0.24  | 1.21x10 <sup>-3</sup> |
| TAG (51:1)_FA (17:0) | 0.000 | 0.24  | 1.21x10 <sup>-3</sup> |
| TAG (54:3)_FA (18:0) | 0.005 | 0.24  | 1.36x10 <sup>-3</sup> |
| L3FC                 | 0.024 | -0.24 | 1.43x10 <sup>-3</sup> |
| DAG (18:0/18:2)      | 0.000 | 0.24  | 1.53x10 <sup>-3</sup> |
| DAG (16:1/18:2)      | 0.000 | 0.24  | 1.63x10 <sup>-3</sup> |
| TAG (51:1)_FA (16:0) | 0.001 | 0.23  | 1.78x10 <sup>-3</sup> |
| TAG (56:5)_FA (22:4) | 0.002 | 0.23  | 1.79x10 <sup>-3</sup> |
| TAG (54:8)_FA (18:3) | 0.012 | -0.23 | 1.80x10 <sup>-3</sup> |
| TAG (51:2)_FA (17:0) | 0.001 | 0.23  | 1.82x10 <sup>-3</sup> |
| PE.O (18:0/18:1)     | 0.015 | 0.23  | 1.96x10 <sup>-3</sup> |
| TAG (50:2)_FA (16:0) | 0.004 | 0.23  | 2.29x10 <sup>-3</sup> |
| LPE (18:0)           | 0.029 | -0.23 | 2.35x10 <sup>-3</sup> |
| TAG (58:6)_FA (18:1) | 0.003 | 0.23  | 2.44x10 <sup>-3</sup> |
| TAG (56:6)_FA (22:4) | 0.000 | 0.23  | 2.53x10 <sup>-3</sup> |
| TAG (53:3)_FA (17:0) | 0.002 | 0.23  | 2.59x10 <sup>-3</sup> |

|                      |       |       |                       |
|----------------------|-------|-------|-----------------------|
| PE (18:0/20:0)       | 0.031 | -0.23 | 2.69x10 <sup>-3</sup> |
| TAG (51:4)_FA (20:4) | 0.002 | 0.23  | 2.70x10 <sup>-3</sup> |
| PI (18:0/22:6)       | 0.025 | -0.23 | 2.71x10 <sup>-3</sup> |
| IDFC                 | 0.011 | 0.22  | 2.82x10 <sup>-3</sup> |
| TAG (50:2)_FA (18:2) | 0.000 | 0.22  | 2.86x10 <sup>-3</sup> |
| TAG (58:6)_FA (22:5) | 0.001 | 0.22  | 2.89x10 <sup>-3</sup> |
| DCER (20:0)          | 0.013 | -0.22 | 3.09x10 <sup>-3</sup> |
| TAG (49:0)_FA (16:0) | 0.000 | 0.22  | 3.09x10 <sup>-3</sup> |
| TAG (53:1)_FA (18:1) | 0.000 | 0.22  | 3.09x10 <sup>-3</sup> |
| TAG (49:0)_FA (17:0) | 0.002 | 0.22  | 3.19x10 <sup>-3</sup> |
| TAG (53:2)_FA (17:0) | 0.001 | 0.22  | 3.20x10 <sup>-3</sup> |
| DAG (16:1/18:0)      | 0.003 | 0.22  | 3.39x10 <sup>-3</sup> |
| TAG (56:4)_FA (22:4) | 0.000 | 0.22  | 3.44x10 <sup>-3</sup> |
| TAG (56:6)_FA (18:1) | 0.001 | 0.22  | 3.73x10 <sup>-3</sup> |
| TAG (50:1)_FA (16:0) | 0.004 | 0.22  | 3.75x10 <sup>-3</sup> |
| PC (18:0/16:1)       | 0.016 | -0.22 | 4.20x10 <sup>-3</sup> |
| TAG (52:2)_FA (18:0) | 0.002 | 0.22  | 4.22x10 <sup>-3</sup> |
| TAG (54:2)_FA (18:0) | 0.004 | 0.22  | 4.22x10 <sup>-3</sup> |
| Isoleucine           | 0.011 | -0.22 | 4.39x10 <sup>-3</sup> |
| TAG (53:2)_FA (18:1) | 0.000 | 0.22  | 4.39x10 <sup>-3</sup> |
| DAG (18:0/18:3)      | 0.000 | 0.22  | 4.39x10 <sup>-3</sup> |
| TAG (48:5)_FA (18:3) | 0.021 | -0.21 | 4.43x10 <sup>-3</sup> |
| TAG (52:2)_FA (16:1) | 0.001 | 0.21  | 4.82x10 <sup>-3</sup> |
| LCER (18:0)          | 0.018 | -0.21 | 4.82x10 <sup>-3</sup> |
| TAG (51:2)_FA (18:2) | 0.005 | 0.21  | 4.83x10 <sup>-3</sup> |
| TAG (58:8)_FA (18:1) | 0.005 | 0.21  | 5.48x10 <sup>-3</sup> |
| PS (18:0/20:0)       | 0.019 | 0.21  | 5.63x10 <sup>-3</sup> |
| TAG (52:3)_FA (18:0) | 0.000 | 0.21  | 6.00x10 <sup>-3</sup> |
| TAG (48:1)_FA (16:1) | 0.001 | 0.21  | 6.48x10 <sup>-3</sup> |
| PG (20:0/16:1)       | 0.003 | -0.21 | 6.58x10 <sup>-3</sup> |
| SM (22:0)            | 0.005 | -0.21 | 6.84x10 <sup>-3</sup> |
| TAG (53:1)_FA (17:0) | 0.001 | 0.20  | 7.18x10 <sup>-3</sup> |
| TAG (56:8)_FA (16:0) | 0.003 | 0.20  | 7.91x10 <sup>-3</sup> |
| FFA (22:6)           | 0.012 | -0.20 | 8.06x10 <sup>-3</sup> |
| TAG (56:5)_FA (16:0) | 0.000 | 0.20  | 8.06x10 <sup>-3</sup> |
| FFA (20:1)           | 0.011 | 0.20  | 8.41x10 <sup>-3</sup> |
| TAG (50:2)_FA (16:1) | 0.003 | 0.20  | 9.09x10 <sup>-3</sup> |

|                      |       |       |                       |
|----------------------|-------|-------|-----------------------|
| DAG (18:2/22:5)      | 0.004 | 0.20  | 9.37x10 <sup>-3</sup> |
| PG (18:2/18:2)       | 0.001 | -0.20 | 9.51x10 <sup>-3</sup> |
| PG (16:0/18:2)       | 0.031 | -0.20 | 9.56x10 <sup>-3</sup> |
| HCER (20:1)          | 0.015 | -0.20 | 9.93x10 <sup>-3</sup> |
| TAG (58:7)_FA (18:1) | 0.002 | 0.20  | 9.93x10 <sup>-3</sup> |
| TAG (56:7)_FA (20:3) | 0.025 | -0.20 | 9.98x10 <sup>-3</sup> |
| TAG (52:1)_FA (18:1) | 0.003 | 0.20  | 1.00x10 <sup>-2</sup> |
| TAG (51:1)_FA (18:0) | 0.001 | 0.20  | 1.03x10 <sup>-2</sup> |
| PE (18:0/18:2)       | 0.020 | -0.20 | 1.05x10 <sup>-2</sup> |
| TAG (53:1)_FA (18:0) | 0.000 | 0.20  | 1.05x10 <sup>-2</sup> |
| TAG (52:3)_FA (20:0) | 0.001 | 0.20  | 1.05x10 <sup>-2</sup> |
| PC (18:1/20:2)       | 0.022 | -0.19 | 1.07x10 <sup>-2</sup> |
| TAG (56:6)_FA (16:0) | 0.002 | 0.19  | 1.10x10 <sup>-2</sup> |
| TAG (56:6)_FA (20:3) | 0.025 | -0.19 | 1.10x10 <sup>-2</sup> |
| TAG (56:7)_FA (20:4) | 0.001 | 0.19  | 1.15x10 <sup>-2</sup> |
| TAG (54:3)_FA (18:1) | 0.002 | 0.19  | 1.21x10 <sup>-2</sup> |
| DAG (16:1/22:6)      | 0.003 | 0.19  | 1.23x10 <sup>-2</sup> |
| PI (16:0/22:5)       | 0.022 | -0.19 | 1.26x10 <sup>-2</sup> |
| TAG (56:6)_FA (22:6) | 0.002 | 0.19  | 1.27x10 <sup>-2</sup> |
| TAG (54:4)_FA (18:0) | 0.000 | 0.19  | 1.27x10 <sup>-2</sup> |
| PI (18:0/18:0)       | 0.015 | -0.19 | 1.31x10 <sup>-2</sup> |
| TAG (49:1)_FA (18:1) | 0.004 | 0.19  | 1.32x10 <sup>-2</sup> |
| PE (18:0/20:1)       | 0.021 | -0.19 | 1.32x10 <sup>-2</sup> |
| TAG (56:2)_FA (20:0) | 0.016 | -0.19 | 1.32x10 <sup>-2</sup> |
| TAG (52:1)_FA (16:0) | 0.003 | 0.19  | 1.36x10 <sup>-2</sup> |
| PE (18:1/18:1)       | 0.007 | 0.19  | 1.40x10 <sup>-2</sup> |
| TAG (53:2)_FA (18:2) | 0.004 | 0.19  | 1.43x10 <sup>-2</sup> |
| PG (20:0/18:1)       | 0.007 | -0.19 | 1.43x10 <sup>-2</sup> |
| TAG (50:4)_FA (20:3) | 0.020 | -0.19 | 1.54x10 <sup>-2</sup> |
| TAG (54:2)_FA (18:1) | 0.002 | 0.18  | 1.61x10 <sup>-2</sup> |
| TAG (49:1)_FA (16:1) | 0.002 | 0.18  | 1.64x10 <sup>-2</sup> |
| LDHD                 | 0.011 | 0.18  | 1.66x10 <sup>-2</sup> |
| TAG (51:2)_FA (18:1) | 0.003 | 0.18  | 1.73x10 <sup>-2</sup> |
| TAG (56:3)_FA (20:0) | 0.019 | -0.18 | 1.73x10 <sup>-2</sup> |
| TAG (48:0)_FA (16:0) | 0.000 | 0.18  | 1.82x10 <sup>-2</sup> |
| TAG (48:4)_FA (18:3) | 0.019 | -0.18 | 1.82x10 <sup>-2</sup> |
| PE (18:0/20:4)       | 0.002 | 0.18  | 1.84x10 <sup>-2</sup> |

|                      |       |       |                       |
|----------------------|-------|-------|-----------------------|
| TAG (52:1)_FA (18:0) | 0.004 | 0.18  | 1.84x10 <sup>-2</sup> |
| TAG (54:3)_FA (18:2) | 0.003 | 0.18  | 1.84x10 <sup>-2</sup> |
| TAG (51:2)_FA (16:0) | 0.004 | 0.18  | 1.87x10 <sup>-2</sup> |
| TAG (54:6)_FA (18:3) | 0.021 | -0.18 | 1.91x10 <sup>-2</sup> |
| TAG (56:9)_FA (18:3) | 0.013 | -0.18 | 1.91x10 <sup>-2</sup> |
| TAG (58:7)_FA (22:4) | 0.001 | 0.18  | 1.91x10 <sup>-2</sup> |
| V5FC                 | 0.007 | -0.18 | 1.92x10 <sup>-2</sup> |
| TPAB                 | 0.004 | 0.18  | 1.93x10 <sup>-2</sup> |
| TBPN                 | 0.004 | 0.18  | 1.93x10 <sup>-2</sup> |
| LCER.d (18:0/20:0)   | 0.015 | -0.18 | 1.95x10 <sup>-2</sup> |
| TAG (55:3)_FA (18:1) | 0.000 | 0.18  | 1.97x10 <sup>-2</sup> |
| TAG (51:2)_FA (16:1) | 0.002 | 0.18  | 1.97x10 <sup>-2</sup> |
| TAG (58:9)_FA (18:1) | 0.000 | 0.18  | 2.00x10 <sup>-2</sup> |
| TAG (56:7)_FA (22:6) | 0.002 | 0.18  | 2.03x10 <sup>-2</sup> |
| TAG (49:1)_FA (16:0) | 0.005 | 0.18  | 2.05x10 <sup>-2</sup> |
| TAG (51:0)_FA (16:0) | 0.001 | 0.18  | 2.06x10 <sup>-2</sup> |
| PE (16:0/18:3)       | 0.008 | -0.18 | 2.08x10 <sup>-2</sup> |
| V5CH                 | 0.009 | 0.18  | 2.13x10 <sup>-2</sup> |
| TAG (53:4)_FA (20:4) | 0.001 | 0.18  | 2.16x10 <sup>-2</sup> |
| TAG (53:3)_FA (18:2) | 0.006 | 0.18  | 2.17x10 <sup>-2</sup> |
| Valine               | 0.006 | -0.18 | 2.19x10 <sup>-2</sup> |
| LPE (22:6)           | 0.013 | -0.18 | 2.25x10 <sup>-2</sup> |
| TAG (52:5)_FA (20:5) | 0.001 | 0.17  | 2.27x10 <sup>-2</sup> |
| TAG (58:7)_FA (22:6) | 0.001 | 0.17  | 2.29x10 <sup>-2</sup> |
| Lysine               | 0.006 | -0.17 | 2.31x10 <sup>-2</sup> |
| TAG (54:5)_FA (22:4) | 0.003 | 0.17  | 2.33x10 <sup>-2</sup> |
| TAG (52:2)_FA (18:2) | 0.003 | 0.17  | 2.33x10 <sup>-2</sup> |
| TAG (53:2)_FA (16:0) | 0.002 | 0.17  | 2.33x10 <sup>-2</sup> |
| TAG (47:0)_FA (16:0) | 0.003 | 0.17  | 2.35x10 <sup>-2</sup> |
| TAG (51:0)_FA (17:0) | 0.002 | 0.17  | 2.35x10 <sup>-2</sup> |
| DAG (16:0/18:0)      | 0.002 | 0.17  | 2.48x10 <sup>-2</sup> |
| TAG (52:5)_FA (20:4) | 0.004 | 0.17  | 2.55x10 <sup>-2</sup> |
| TAG (52:5)_FA (20:3) | 0.023 | -0.17 | 2.56x10 <sup>-2</sup> |
| DAG (16:0/18:3)      | 0.003 | 0.17  | 2.61x10 <sup>-2</sup> |
| TAG (51:0)_FA (18:0) | 0.002 | 0.17  | 2.61x10 <sup>-2</sup> |
| L2PL                 | 0.009 | -0.17 | 2.63x10 <sup>-2</sup> |
| TAG (58:8)_FA (22:6) | 0.002 | 0.17  | 2.63x10 <sup>-2</sup> |

|                       |       |       |                       |
|-----------------------|-------|-------|-----------------------|
| PG (18:1/20:3)        | 0.019 | 0.17  | $2.65 \times 10^{-2}$ |
| TAG (58:8)_FA (20:4)  | 0.001 | 0.17  | $2.82 \times 10^{-2}$ |
| TAG (58:7)_FA (18:2)  | 0.004 | 0.17  | $2.90 \times 10^{-2}$ |
| V5PL                  | 0.008 | 0.17  | $3.05 \times 10^{-2}$ |
| TAG (52:3)_FA (18:1)  | 0.000 | 0.17  | $3.19 \times 10^{-2}$ |
| TAG (50:5)_FA (18:3)  | 0.019 | -0.16 | $3.24 \times 10^{-2}$ |
| TAG (54:7)_FA (18:3)  | 0.017 | -0.16 | $3.28 \times 10^{-2}$ |
| TAG (53:4)_FA (17:0)  | 0.004 | 0.16  | $3.34 \times 10^{-2}$ |
| DAG (18:1/20:1)       | 0.002 | 0.16  | $3.44 \times 10^{-2}$ |
| TAG (56:7)_FA (18:1)  | 0.002 | 0.16  | $3.47 \times 10^{-2}$ |
| TAG (52:3)_FA (16:1)  | 0.002 | 0.16  | $3.60 \times 10^{-2}$ |
| PC (18:0/22:5)        | 0.002 | 0.16  | $3.63 \times 10^{-2}$ |
| L2FC                  | 0.010 | -0.16 | $3.65 \times 10^{-2}$ |
| TAG (49:2)_FA (18:2)  | 0.006 | 0.16  | $3.69 \times 10^{-2}$ |
| TAG (53:6)_FA (20:4)  | 0.006 | 0.16  | $3.76 \times 10^{-2}$ |
| Creatinine            | 0.018 | 0.16  | $3.77 \times 10^{-2}$ |
| TAG (50:5)_FA (14:0)  | 0.019 | -0.16 | $3.83 \times 10^{-2}$ |
| TAG (50:3)_FA (16:0)  | 0.003 | 0.16  | $4.01 \times 10^{-2}$ |
| TAG (50:1)_FA (16:1)  | 0.002 | 0.16  | $4.09 \times 10^{-2}$ |
| V1CH                  | 0.003 | 0.16  | $4.13 \times 10^{-2}$ |
| TAG (58:10)_FA (20:5) | 0.006 | -0.16 | $4.13 \times 10^{-2}$ |
| L5CH                  | 0.018 | -0.16 | $4.32 \times 10^{-2}$ |
| TAG (49:2)_FA (16:0)  | 0.006 | 0.16  | $4.38 \times 10^{-2}$ |
| TAG (51:3)_FA (17:0)  | 0.003 | 0.16  | $4.37 \times 10^{-2}$ |
| TAG (54:4)_FA (18:1)  | 0.002 | 0.16  | $4.38 \times 10^{-2}$ |
| H1CH                  | 0.023 | -0.16 | $4.40 \times 10^{-2}$ |
| TAG (54:8)_FA (18:2)  | 0.009 | -0.16 | $4.49 \times 10^{-2}$ |
| PE (18:1/22:6)        | 0.003 | 0.16  | $4.52 \times 10^{-2}$ |
| PE (18:1/20:1)        | 0.016 | -0.16 | $4.53 \times 10^{-2}$ |
| DAG (18:0/22:6)       | 0.002 | 0.15  | $4.61 \times 10^{-2}$ |
| TAG (49:0)_FA (18:0)  | 0.000 | 0.15  | $4.65 \times 10^{-2}$ |
| TAG (56:7)_FA (16:0)  | 0.004 | 0.15  | $4.72 \times 10^{-2}$ |
| Ornithine             | 0.010 | 0.15  | $4.73 \times 10^{-2}$ |
| PS (18:1/18:2)        | 0.001 | 0.15  | $4.75 \times 10^{-2}$ |

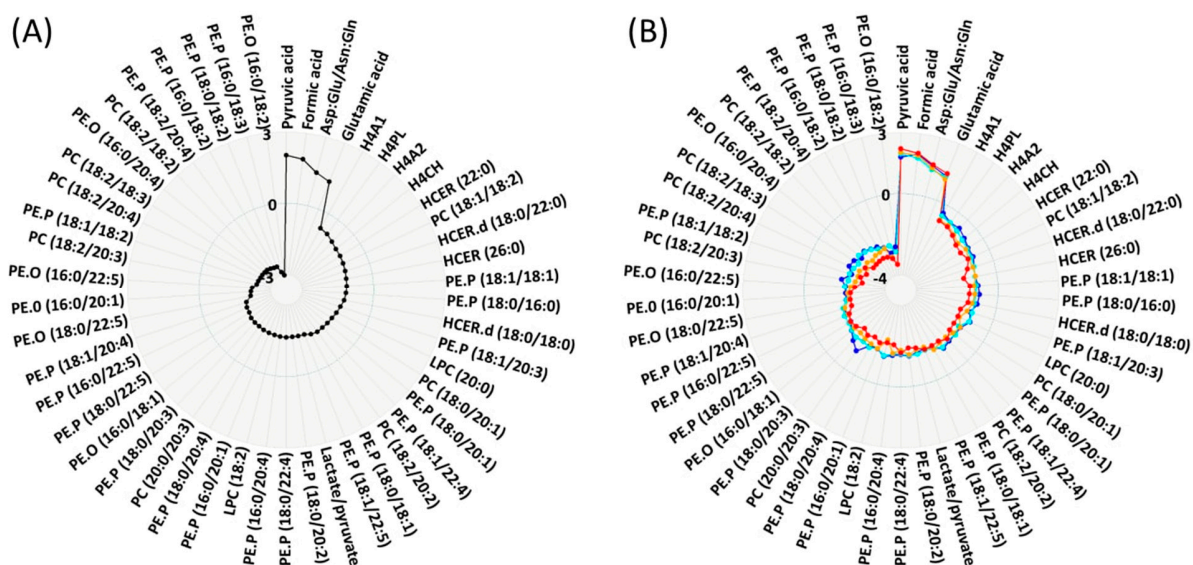

**Figure S1** - (A) Radar plot showing the log<sub>2</sub> fold change of the top 50 metabolites, lipoproteins and lipids with the most significant p-values for the control versus SARS-CoV-2 positive patients. (B) Radar plot showing the log<sub>2</sub> fold change of the top 50 metabolites, lipoproteins and lipids with the most significant p-values for the control versus SARS-CoV-2 positive model but coloured by severity class. Control vs group B severity log<sub>2</sub> fold change (blue), Control vs group C severity log<sub>2</sub> fold change (cyan), Control vs group D severity log<sub>2</sub> fold change (orange), Control vs group E severity log<sub>2</sub> fold change (red). The radar plots are ordered by fold change.



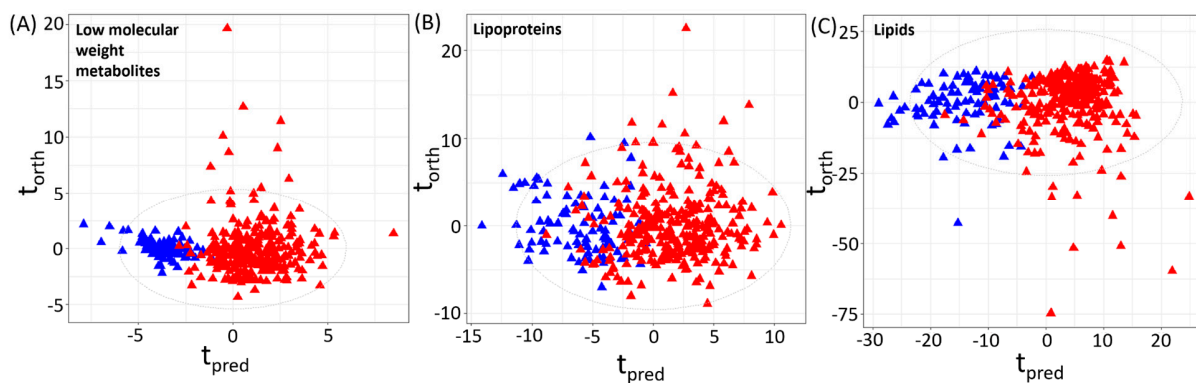

**Figure S3 – O-PLS-DA scores plots of the low molecular weight metabolites, lipoproteins and lipids.** (A) O-PLS-DA of control samples (blue triangles) and SARS-CoV-2 positive patients (red triangles) for the low molecular weight metabolites,  $R^2X=0.12$ , AUROC=1.00. (B) O-PLS-DA of control samples (blue triangles) and SARS-CoV-2 positive patients (red triangles) for the NMR derived lipoproteins,  $R^2X=0.26$ , AUROC=0.95. (C) O-PLS-DA of control samples (blue triangles) and SARS-CoV-2 positive patients (red triangles) for the MS derived lipids,  $R^2X=0.17$ , AUROC=0.98.

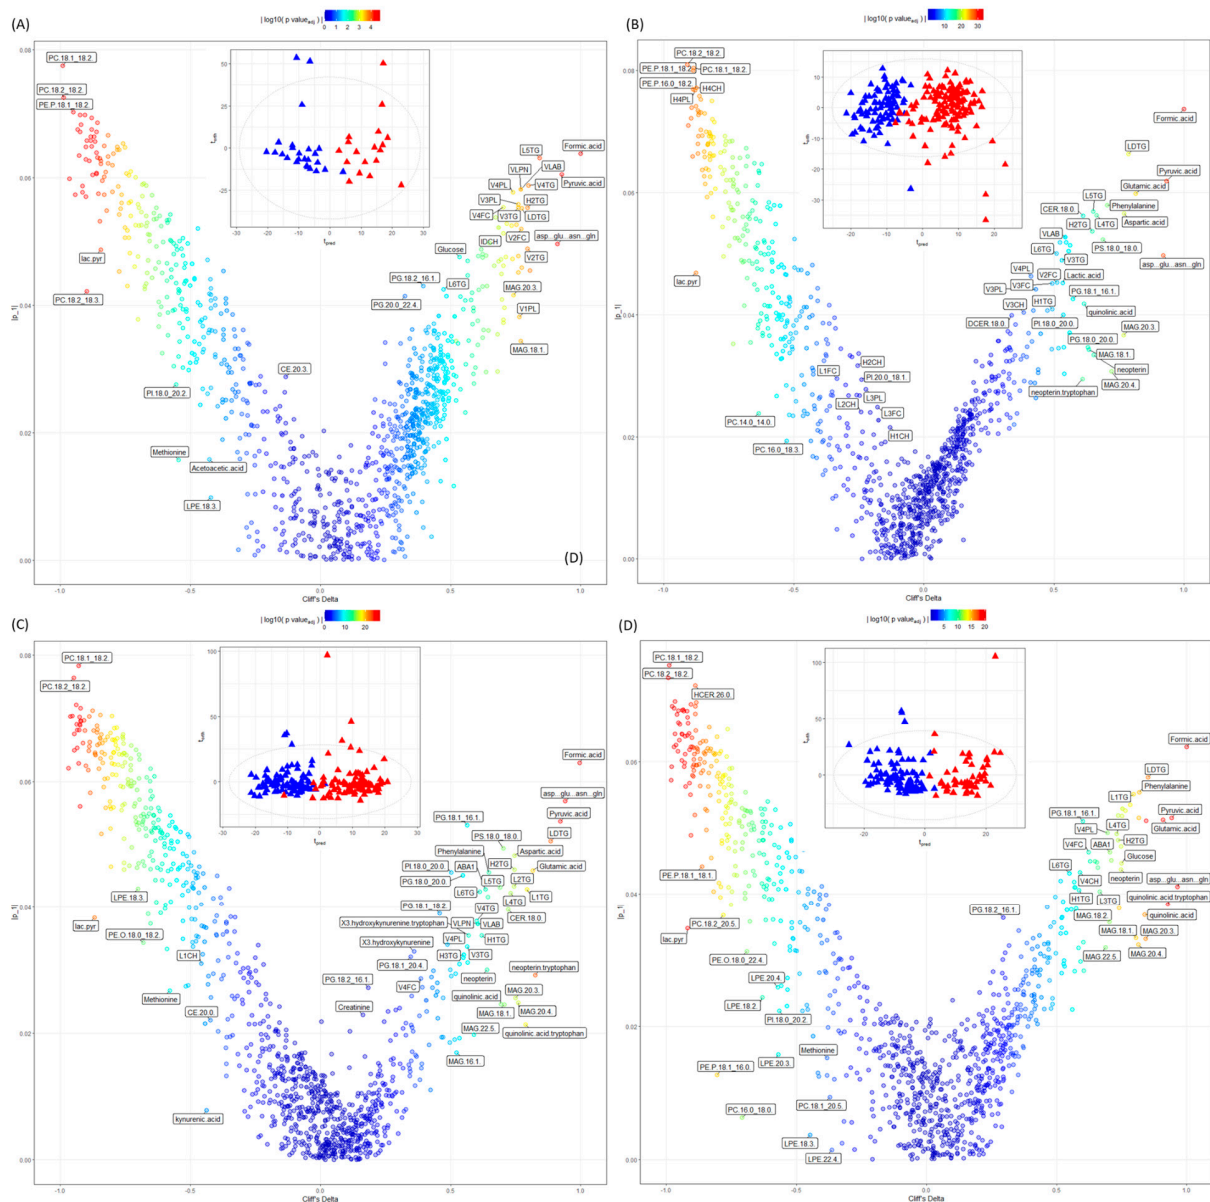

**Figure S4 - Orthogonal Partial Least Squared (O-PLS-DA) and eruption plots between controls and SARS-CoV-2 positive patients of each severity group for the four Integrated assays.** (A) Eruption plot of the controls vs group B severity group with the O-PLS-DA of controls (blue triangles) and SARS-CoV-2 group B severity patients (red triangles) ( $R^2X=0.21$ , AUROC=0.99) inset. (B) Eruption plot of the controls vs group C severity group with the O-PLS-DA of controls (blue triangles) and SARS-CoV-2 group B severity patients (red triangles) ( $R^2X=0.12$ , AUROC=0.99) inset. (C) Eruption plot of the controls vs group D severity group with the O-PLS-DA of controls (blue triangles) and SARS-CoV-2 group B severity patients (red triangles) ( $R^2X=0.20$ , AUROC=0.99) inset. (D) Eruption plot of the controls vs group E severity group with the O-PLS-DA of controls (blue triangles) and SARS-CoV-2 group B severity patients (red triangles) ( $R^2X=0.22$ , AUROC=1.00) inset.

**Table S6 - OPLS loadings, Cliff's delta and adjusted p-values of all the assays combined for the comparison of the controls and SARS-CoV-2 positive patients in severity class B. Only the 50 most significant metabolites are shown.**

| Metabolite         | OPLS loadings | Cliff's delta | Adjusted p-value      |
|--------------------|---------------|---------------|-----------------------|
| Formic acid        | 0.064         | 1.00          | 1.59x10 <sup>-5</sup> |
| PC (18:1/18:2)     | 0.078         | -0.99         | 1.59x10 <sup>-5</sup> |
| PC (18:2/18:2)     | 0.073         | -0.99         | 1.59x10 <sup>-5</sup> |
| PE.O (16:0/18:2)   | 0.060         | -0.96         | 2.37x10 <sup>-5</sup> |
| PE.P (18:1/18:2)   | 0.070         | -0.95         | 2.85x10 <sup>-5</sup> |
| Pyruvic acid       | 0.061         | 0.93          | 2.86x10 <sup>-5</sup> |
| LPC (18:2)         | 0.057         | -0.94         | 2.86x10 <sup>-5</sup> |
| PE.P (16:0/18:2)   | 0.070         | -0.92         | 2.86x10 <sup>-5</sup> |
| PE.P (18:0/18:2)   | 0.068         | -0.93         | 2.86x10 <sup>-5</sup> |
| PE.P (18:0/20:1)   | 0.067         | -0.92         | 2.86x10 <sup>-5</sup> |
| PE.P (18:2/20:4)   | 0.063         | -0.93         | 2.86x10 <sup>-5</sup> |
| HCER.d (18:0/18:0) | 0.068         | -0.92         | 2.92x10 <sup>-5</sup> |
| PE.O (16:0/20:4)   | 0.059         | -0.92         | 2.92x10 <sup>-5</sup> |
| PE.P (16:0/18:3)   | 0.058         | -0.92         | 2.92x10 <sup>-5</sup> |
| Asp:Glu/Asn/Gln    | 0.050         | 0.91          | 3.09x10 <sup>-5</sup> |
| PC (18:2/20:2)     | 0.057         | -0.90         | 3.16x10 <sup>-5</sup> |
| PE.O (18:0/22:5)   | 0.065         | -0.90         | 3.16x10 <sup>-5</sup> |
| PE.P (18:1/20:1)   | 0.070         | -0.91         | 3.16x10 <sup>-5</sup> |
| PE.P (18:0/20:4)   | 0.063         | -0.90         | 3.16x10 <sup>-5</sup> |
| PC (18:2/18:3)     | 0.042         | -0.90         | 3.25x10 <sup>-5</sup> |
| PC (18:2/20:4)     | 0.066         | -0.90         | 3.25x10 <sup>-5</sup> |
| HCER (22:0)        | 0.063         | -0.89         | 3.99x10 <sup>-5</sup> |
| PC (16:0/18:2)     | 0.066         | -0.88         | 4.15x10 <sup>-5</sup> |
| PE.O (16:0/20:1)   | 0.066         | -0.88         | 4.15x10 <sup>-5</sup> |
| PC (20:0/20:4)     | 0.065         | -0.88         | 4.18x10 <sup>-5</sup> |
| PE.P (18:0/18:1)   | 0.068         | -0.88         | 4.18x10 <sup>-5</sup> |
| PE.P (18:1/22:5)   | 0.069         | -0.88         | 4.18x10 <sup>-5</sup> |
| PE.O (18:0/22:4)   | 0.060         | -0.88         | 4.56x10 <sup>-5</sup> |
| H4CH               | 0.066         | -0.87         | 4.99x10 <sup>-5</sup> |
| PC (18:0/20:1)     | 0.066         | -0.87         | 5.44x10 <sup>-5</sup> |
| PE.O (16:0/18:1)   | 0.061         | -0.86         | 5.44x10 <sup>-5</sup> |
| PE.P (16:0/22:5)   | 0.067         | -0.86         | 5.44x10 <sup>-5</sup> |
| PE.P (18:0/20:4)   | 0.061         | -0.86         | 5.44x10 <sup>-5</sup> |

|                    |       |       |                       |
|--------------------|-------|-------|-----------------------|
| PE.P (18:1/22:4)   | 0.064 | -0.86 | 5.44x10 <sup>-5</sup> |
| PE.P (18:0/22:5)   | 0.069 | -0.86 | 5.80x10 <sup>-5</sup> |
| PE.P (18:2/18:2)   | 0.063 | -0.86 | 5.80x10 <sup>-5</sup> |
| PE.O (16:0/22:5)   | 0.057 | -0.85 | 6.38x10 <sup>-5</sup> |
| PE.O (16:0/22:6)   | 0.053 | -0.85 | 6.83x10 <sup>-5</sup> |
| PE.P (18:0/22:4)   | 0.063 | -0.85 | 6.83x10 <sup>-5</sup> |
| Lactate/pyruvate   | 0.049 | -0.84 | 7.15x10 <sup>-5</sup> |
| PC (20:0/18:1)     | 0.062 | -0.84 | 7.15x10 <sup>-5</sup> |
| PE.P (18:0/18:0)   | 0.063 | -0.84 | 7.15x10 <sup>-5</sup> |
| L5TG               | 0.063 | 0.84  | 7.41x10 <sup>-5</sup> |
| PE.P (16:0/20:4)   | 0.059 | -0.84 | 7.69x10 <sup>-5</sup> |
| HCER.d (18:0/22:0) | 0.060 | -0.83 | 9.13x10 <sup>-5</sup> |
| PE.P (16:0/20:1)   | 0.065 | -0.83 | 9.13x10 <sup>-5</sup> |
| PE.P (18:1/16:0)   | 0.057 | -0.83 | 9.13x10 <sup>-5</sup> |
| PE.P (18:0/16:0)   | 0.061 | -0.83 | 1.01x10 <sup>-4</sup> |
| PC (20:0/20:3)     | 0.055 | -0.82 | 1.11x10 <sup>-4</sup> |
| H4PL               | 0.063 | -0.82 | 1.17x10 <sup>-4</sup> |

**Table S7 - OPLS loadings, Cliff's delta and adjusted p-values of all the assays combined for the comparison of the controls and SARS-CoV-2 positive patients in severity class C.** Only the 50 most significant metabolites are shown.

| Metabolite       | OPLS loadings | Cliff's delta | Adjusted p-value       |
|------------------|---------------|---------------|------------------------|
| Formic acid      | 0.074         | 1.00          | 4.47x10 <sup>-34</sup> |
| Pyruvic acid     | 0.062         | 0.93          | 8.99x10 <sup>-30</sup> |
| Asp:Glu/Asn:Gln  | 0.050         | 0.92          | 4.05x10 <sup>-29</sup> |
| PC (18:2/18:2)   | 0.081         | -0.91         | 1.28x10 <sup>-28</sup> |
| PE.O (16:0/20:4) | 0.071         | -0.91         | 1.66x10 <sup>-28</sup> |
| PE.O (16:0/18:2) | 0.072         | -0.89         | 8.50x10 <sup>-28</sup> |
| PE.P (18:2/20:4) | 0.074         | -0.89         | 8.50x10 <sup>-28</sup> |
| PE.P (16:0/22:5) | 0.066         | -0.89         | 1.31x10 <sup>-27</sup> |
| PE.P (16:0/18:2) | 0.077         | -0.89         | 1.49x10 <sup>-27</sup> |
| PE.P (18:1/18:2) | 0.080         | -0.89         | 1.49x10 <sup>-27</sup> |
| PC (18:1/18:2)   | 0.080         | -0.88         | 1.88x10 <sup>-27</sup> |
| H4PL             | 0.077         | -0.88         | 3.71x10 <sup>-27</sup> |
| Lactate/pyruvate | 0.047         | -0.88         | 4.94x10 <sup>-27</sup> |
| PE.P (18:0/18:2) | 0.074         | -0.88         | 4.94x10 <sup>-27</sup> |

|                    |       |       |                        |
|--------------------|-------|-------|------------------------|
| H4CH               | 0.077 | -0.87 | $5.88 \times 10^{-27}$ |
| HCER.d (18:0/18:0) | 0.073 | -0.87 | $1.24 \times 10^{-26}$ |
| PE.O (16:0/18:1)   | 0.066 | -0.87 | $1.24 \times 10^{-26}$ |
| PE.O (16:0/20:1)   | 0.068 | -0.87 | $1.24 \times 10^{-26}$ |
| PE.P (18:0/18:1)   | 0.073 | -0.87 | $1.47 \times 10^{-26}$ |
| PE.P (18:0/22:5)   | 0.069 | -0.87 | $1.47 \times 10^{-26}$ |
| PE.P (18:0/20:4)   | 0.073 | -0.87 | $1.54 \times 10^{-26}$ |
| PC (18:2/20:2)     | 0.076 | -0.86 | $2.12 \times 10^{-26}$ |
| PE.P (16:0/20:1)   | 0.073 | -0.86 | $3.91 \times 10^{-26}$ |
| LPC (18:2)         | 0.075 | -0.86 | $4.11 \times 10^{-26}$ |
| PC (18:2/20:3)     | 0.070 | -0.86 | $4.22 \times 10^{-26}$ |
| PE.P (16:0/20:4)   | 0.069 | -0.85 | $7.46 \times 10^{-26}$ |
| PE.O (18:0/22:5)   | 0.064 | -0.85 | $7.52 \times 10^{-26}$ |
| PC (20:0/20:3)     | 0.067 | -0.84 | $2.15 \times 10^{-25}$ |
| PE.P (18:0/22:4)   | 0.063 | -0.84 | $2.15 \times 10^{-25}$ |
| PE.P (18:2/18:2)   | 0.073 | -0.84 | $2.54 \times 10^{-25}$ |
| PC (18:0/20:1)     | 0.066 | -0.84 | $2.68 \times 10^{-25}$ |
| PE.O (18:0/22:4)   | 0.061 | -0.84 | $2.72 \times 10^{-25}$ |
| PE.P (18:0/20:1)   | 0.070 | -0.84 | $4.69 \times 10^{-25}$ |
| LPI (18:1)         | 0.064 | -0.84 | $4.87 \times 10^{-25}$ |
| LPI (18:2)         | 0.059 | -0.83 | $6.88 \times 10^{-25}$ |
| PE.P (18:1/22:5)   | 0.068 | -0.83 | $9.11 \times 10^{-25}$ |
| HCER (26:0)        | 0.068 | -0.83 | $1.15 \times 10^{-24}$ |
| PE.P (18:0/20:3)   | 0.068 | -0.83 | $1.20 \times 10^{-24}$ |
| PE.P (16:0/18:3)   | 0.064 | -0.83 | $1.36 \times 10^{-24}$ |
| PE.P (18:0/20:4)   | 0.069 | -0.83 | $1.97 \times 10^{-24}$ |
| PE.O (16:0/22:5)   | 0.066 | -0.82 | $2.14 \times 10^{-24}$ |
| PE.P (18:0/20:2)   | 0.070 | -0.82 | $2.14 \times 10^{-24}$ |
| HCER (22:0)        | 0.066 | -0.82 | $2.54 \times 10^{-24}$ |
| HCER.d (18:0/22:0) | 0.065 | -0.82 | $2.54 \times 10^{-24}$ |
| LPI (20:3)         | 0.063 | -0.82 | $2.65 \times 10^{-24}$ |
| PE.P (18:0/18:0)   | 0.070 | -0.82 | $2.65 \times 10^{-24}$ |
| PC (20:0/18:1)     | 0.060 | -0.82 | $4.46 \times 10^{-24}$ |
| PE.P (18:1/18:1)   | 0.069 | -0.82 | $4.56 \times 10^{-24}$ |
| PC (18:2/20:4)     | 0.068 | -0.82 | $5.19 \times 10^{-24}$ |
| LPC (20:0)         | 0.075 | -0.82 | $6.05 \times 10^{-24}$ |

**Table S8 - OPLS loadings, Cliff's delta and adjusted p-values of all the assays combined for the comparison of the controls and SARS-CoV-2 positive patients in severity class D. Only the 50 most significant metabolites are shown.**

| Metabolite           | OPLS loadings | Cliff's delta | Adjusted p-value       |
|----------------------|---------------|---------------|------------------------|
| Formic acid          | 0.063         | 1.00          | 5.46x10 <sup>-28</sup> |
| PE.O (16:0/20:4)     | 0.062         | -0.97         | 1.14x10 <sup>-26</sup> |
| H4CH                 | 0.070         | -0.96         | 1.89x10 <sup>-26</sup> |
| H4PL                 | 0.070         | -0.95         | 4.13x10 <sup>-26</sup> |
| PC (18:2/18:2)       | 0.076         | -0.95         | 5.90x10 <sup>-26</sup> |
| PE.P (18:1/20:4)     | 0.068         | -0.95         | 5.90x10 <sup>-26</sup> |
| PE.P (18:2/20:4)     | 0.065         | -0.95         | 5.90x10 <sup>-26</sup> |
| Asp:Glu/Asn:Gln      | 0.057         | 0.94          | 1.04x10 <sup>-25</sup> |
| PE.P (18:1/18:2)     | 0.072         | -0.94         | 1.04x10 <sup>-25</sup> |
| LPC (18:2)           | 0.069         | -0.94         | 1.27x10 <sup>-25</sup> |
| PE.P (16:0/20:4)     | 0.065         | -0.94         | 1.41x10 <sup>-25</sup> |
| PE.P (16:0/22:5)     | 0.068         | -0.94         | 1.41x10 <sup>-25</sup> |
| PC (18:1/18:2)       | 0.078         | -0.93         | 2.41x10 <sup>-25</sup> |
| PE.O (16:0/18:2)     | 0.063         | -0.93         | 2.53x10 <sup>-25</sup> |
| H4A2                 | 0.068         | -0.93         | 3.02x10 <sup>-25</sup> |
| PC (18:2/20:2)       | 0.069         | -0.93         | 3.02x10 <sup>-25</sup> |
| H4A1                 | 0.070         | -0.93         | 3.12x10 <sup>-25</sup> |
| PE.P (18:0/18:2)     | 0.069         | -0.92         | 3.65x10 <sup>-25</sup> |
| PC (18:2/18:3)       | 0.056         | -0.92         | 3.91x10 <sup>-25</sup> |
| PE.P (16:0/18:2)     | 0.072         | -0.92         | 4.20x10 <sup>-25</sup> |
| PE.P (18:0/22:5)     | 0.070         | -0.92         | 4.26x10 <sup>-25</sup> |
| Pyruvic acid         | 0.054         | 0.92          | 4.96x10 <sup>-25</sup> |
| PC (18:2/20:3)       | 0.070         | -0.92         | 4.96x10 <sup>-25</sup> |
| PE.P (18:2/18:2)     | 0.066         | -0.91         | 1.08x10 <sup>-24</sup> |
| LPC (20:0)           | 0.070         | -0.91         | 1.59x10 <sup>-24</sup> |
| PE.P (18:1/22:5)     | 0.068         | -0.91         | 2.88x10 <sup>-24</sup> |
| PE.O (16:0/22:5)     | 0.063         | -0.90         | 4.36x10 <sup>-24</sup> |
| PE.O (16:0/18:1)     | 0.062         | -0.89         | 1.31x10 <sup>-23</sup> |
| PE.O (18:0/22:5)     | 0.065         | -0.89         | 1.55x10 <sup>-23</sup> |
| PE.P (18:0/20:4)     | 0.066         | -0.89         | 1.69x10 <sup>-23</sup> |
| PE.P (18:0/18:1)     | 0.070         | -0.89         | 1.73x10 <sup>-23</sup> |
| PC (20:0/20:3)       | 0.066         | -0.89         | 1.89x10 <sup>-23</sup> |
| Neopterin/tryptophan | 0.029         | 0.82          | 1.93x10 <sup>-23</sup> |

|                    |       |       |                        |
|--------------------|-------|-------|------------------------|
| PE.P (16:0/18:3)   | 0.058 | -0.89 | 2.32x10 <sup>-23</sup> |
| LDTG               | 0.051 | 0.88  | 2.94x10 <sup>-23</sup> |
| PC (18:2/20:4)     | 0.071 | -0.88 | 7.29x10 <sup>-23</sup> |
| HCER.d (18:0/18:0) | 0.068 | -0.87 | 9.77x10 <sup>-23</sup> |
| Lactate/pyruvate   | 0.038 | -0.87 | 1.70x10 <sup>-22</sup> |
| PE.O (16:0/20:1)   | 0.065 | -0.87 | 1.91x10 <sup>-22</sup> |
| PI (20:0/18:2)     | 0.064 | -0.87 | 2.09x10 <sup>-22</sup> |
| PE.P (18:1/22:4)   | 0.064 | -0.87 | 2.23x10 <sup>-22</sup> |
| LPC (20:3)         | 0.068 | -0.86 | 3.99x10 <sup>-22</sup> |
| PE.P (16:0/20:1)   | 0.069 | -0.86 | 3.99x10 <sup>-22</sup> |
| PE.P (18:0/16:0)   | 0.068 | -0.86 | 5.19x10 <sup>-22</sup> |
| PE.P (18:0/22:4)   | 0.066 | -0.86 | 5.53x10 <sup>-22</sup> |
| PI (18:1/18:1)     | 0.062 | -0.85 | 1.04x10 <sup>-21</sup> |
| TPA2               | 0.066 | -0.85 | 1.05x10 <sup>-21</sup> |
| H4FC               | 0.067 | -0.85 | 1.41x10 <sup>-21</sup> |
| PE.P (18:0/20:3)   | 0.064 | -0.85 | 1.55x10 <sup>-21</sup> |
| SM (24:0)          | 0.067 | -0.85 | 1.55x10 <sup>-21</sup> |

**Table S9 - OPLS loadings, Cliff's delta and adjusted p-values of all the assays combined for the comparison of the controls and SARS-CoV-2 positive patients in severity class E. Only the 50 most significant metabolites are shown.**

| Metabolite       | OPLS loadings | Cliff's delta | Adjusted p-value       |
|------------------|---------------|---------------|------------------------|
| Formic acid      | 0.064         | 1.00          | 2.50x10 <sup>-21</sup> |
| PC (18:1/18:2)   | 0.075         | -0.99         | 2.67x10 <sup>-21</sup> |
| PC (18:2/18:2)   | 0.073         | -0.99         | 2.67x10 <sup>-21</sup> |
| PE.O (16:0/20:4) | 0.057         | -0.98         | 3.92x10 <sup>-21</sup> |
| PE.P (18:2/20:4) | 0.059         | -0.98         | 3.92x10 <sup>-21</sup> |
| H4PL             | 0.068         | -0.98         | 4.16x10 <sup>-21</sup> |
| H4CH             | 0.068         | -0.97         | 7.25x10 <sup>-21</sup> |
| PC (20:0/20:3)   | 0.062         | -0.97         | 7.25x10 <sup>-21</sup> |
| PC (18:2/20:3)   | 0.064         | -0.97         | 8.31x10 <sup>-21</sup> |
| PC (18:2/20:4)   | 0.069         | -0.97         | 8.31x10 <sup>-21</sup> |
| Asp:Glu/Asn:Gln  | 0.041         | 0.97          | 8.65x10 <sup>-21</sup> |
| PE.P (18:1/20:4) | 0.063         | -0.96         | 2.50x10 <sup>-21</sup> |
| PE.P (16:0/18:2) | 0.067         | -0.96         | 1.26x10 <sup>-20</sup> |
| LPC (18:2)       | 0.062         | -0.96         | 1.73x10 <sup>-20</sup> |

|                            |       |       |                        |
|----------------------------|-------|-------|------------------------|
| TPA2                       | 0.066 | -0.95 | 1.81x10 <sup>-20</sup> |
| H4A1                       | 0.068 | -0.95 | 1.81x10 <sup>-20</sup> |
| PE.P (16:0/22:5)           | 0.063 | -0.95 | 2.28x10 <sup>-20</sup> |
| H4A2                       | 0.066 | 0.95  | 2.62x10 <sup>-20</sup> |
| Neopterin/tryptophan       | 0.051 | 0.84  | 4.83x10 <sup>-20</sup> |
| Pyruvic acid               | 0.052 | 0.94  | 4.93x10 <sup>-20</sup> |
| PE.P (18:1/18:2)           | 0.064 | -0.94 | 4.93x10 <sup>-20</sup> |
| PE.P (16:0/20:4)           | 0.060 | -0.94 | 5.06x10 <sup>-20</sup> |
| TPA1                       | 0.068 | -0.94 | 5.63x10 <sup>-20</sup> |
| PE.P (18:0/22:5)           | 0.064 | -0.94 | 5.63x10 <sup>-20</sup> |
| PC (18:0/20:1)             | 0.068 | -0.94 | 7.36x10 <sup>-20</sup> |
| HDA1                       | 0.068 | -0.93 | 8.26x10 <sup>-20</sup> |
| PE.P (18:2/18:2)           | 0.059 | -0.93 | 1.00x10 <sup>-20</sup> |
| PE.P (18:0/20:3)           | 0.060 | -0.93 | 1.17x10 <sup>-19</sup> |
| PE.P (18:0/20:4)           | 0.061 | -0.93 | 1.17x10 <sup>-19</sup> |
| Quinolinic acid/tryptophan | 0.038 | 0.93  | 1.19x10 <sup>-19</sup> |
| PE.P (18:0/18:2)           | 0.064 | -0.93 | 1.19x10 <sup>-19</sup> |
| PE.O (16:0/22:5)           | 0.056 | -0.93 | 1.29x10 <sup>-19</sup> |
| H4FC                       | 0.068 | -0.92 | 2.37x10 <sup>-19</sup> |
| PC (18:2/22:5)             | 0.064 | -0.92 | 2.60x10 <sup>-19</sup> |
| HCER (22:0)                | 0.067 | -0.92 | 2.62x10 <sup>-19</sup> |
| Lactate/pyruvate           | 0.035 | -0.92 | 2.75x10 <sup>-19</sup> |
| HCER.d (18:0/22:0)         | 0.066 | -0.92 | 3.11x10 <sup>-19</sup> |
| LPC (20:0)                 | 0.064 | -0.91 | 3.80x10 <sup>-19</sup> |
| PE.P (18:0/22:4)           | 0.062 | -0.91 | 4.47x10 <sup>-19</sup> |
| PI (20:0/18:2)             | 0.057 | -0.91 | 4.70x10 <sup>-19</sup> |
| Glutamic acid              | 0.051 | 0.91  | 5.54x10 <sup>-19</sup> |
| PE.O (16:0/18:2)           | 0.055 | -0.91 | 6.52x10 <sup>-19</sup> |
| PE.P (16:0/18:3)           | 0.049 | -0.91 | 6.86x10 <sup>-19</sup> |
| H3FC                       | 0.069 | -0.91 | 7.32x10 <sup>-19</sup> |
| HDA2                       | 0.062 | -0.91 | 7.33x10 <sup>-19</sup> |
| PE.P (16:0/20:1)           | 0.064 | -0.90 | 9.68x10 <sup>-19</sup> |
| PC (18:2/22:6)             | 0.062 | -0.90 | 1.06x10 <sup>-18</sup> |
| PC (18:2/20:2)             | 0.058 | -0.90 | 1.12x10 <sup>-18</sup> |
| PE.O (16:0/20:1)           | 0.059 | -0.90 | 1.37x10 <sup>-18</sup> |
| PE.P (18:1/22:4)           | 0.058 | -0.90 | 1.50x10 <sup>-18</sup> |

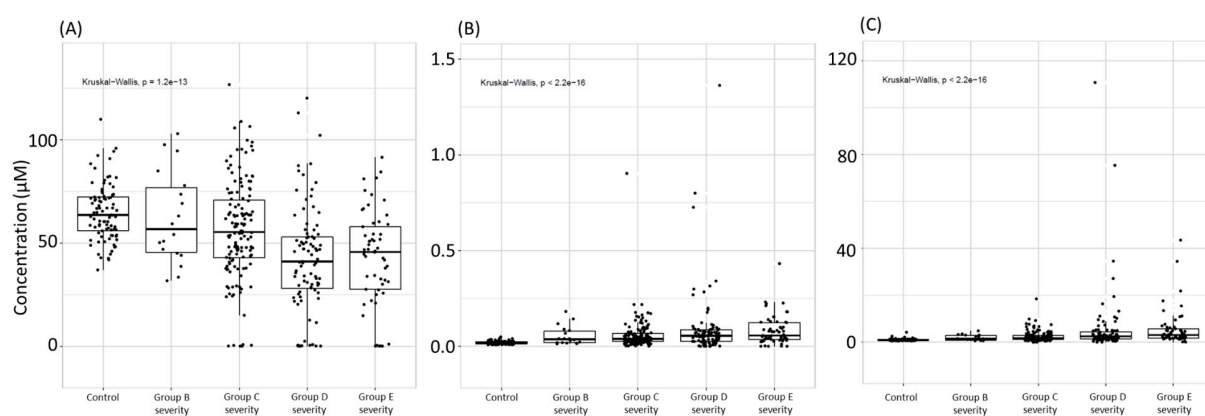

**Figure S5 – Concentrations of metabolites for the controls and each severity class. (A) tryptophan, (B) neopterin and (C) quinolinic acid.**

## Section 4 - Severity group modeling

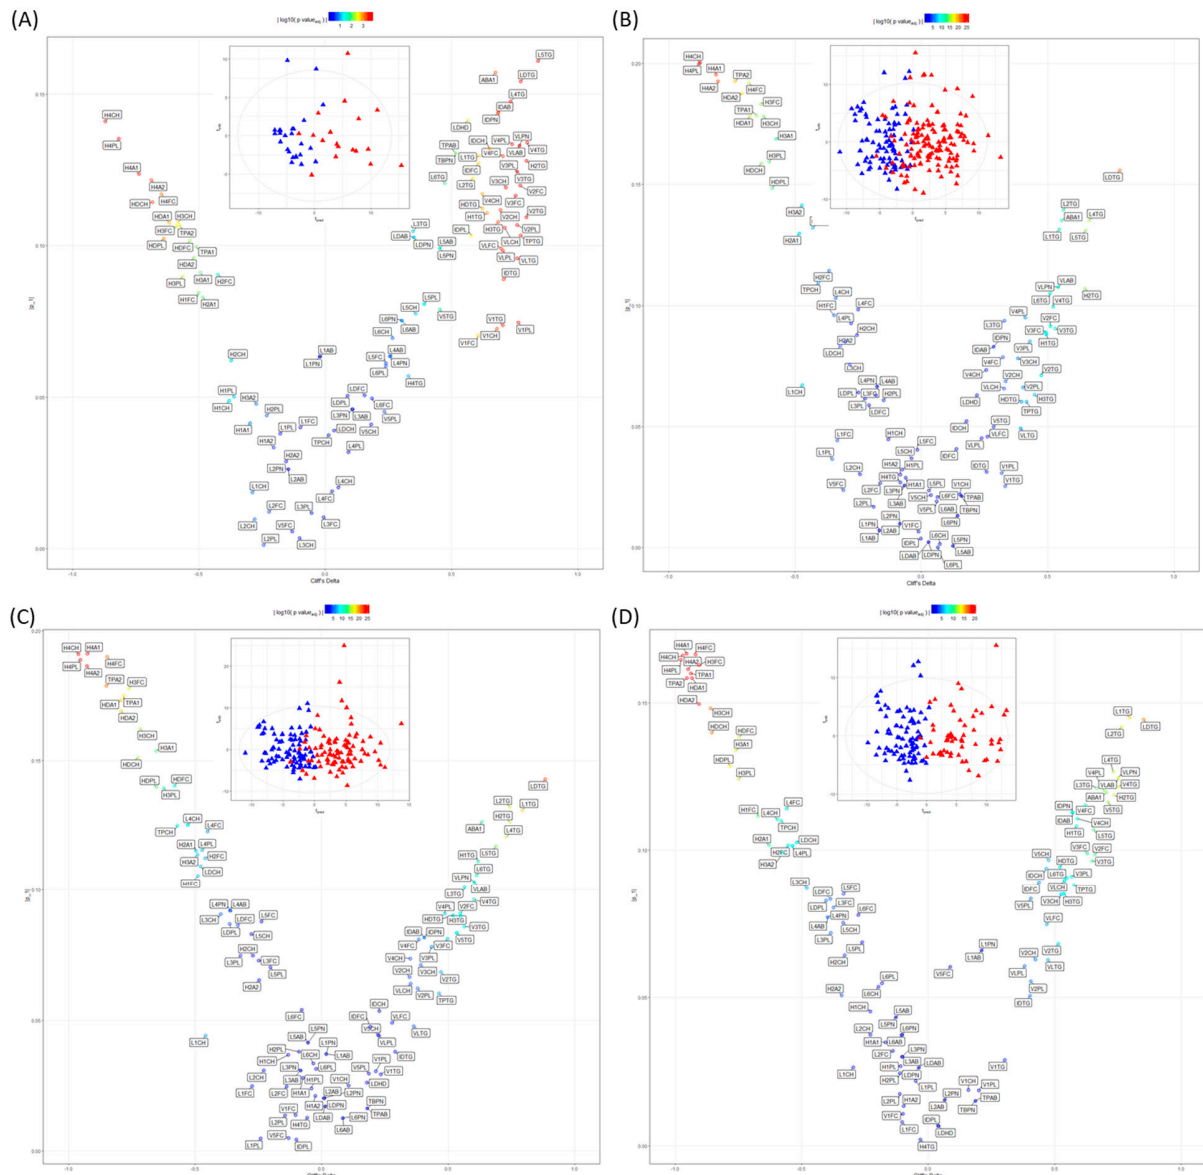

**Figure S6 - Orthogonal Partial Least Squared (O-PLS-DA) and eruption plots between controls and SARS-CoV-2 positive patients of each severity group for the lipoproteins.** (A) Eruption plot of the controls vs group B severity group with the O-PLS-DA of controls (blue triangles) and SARS-CoV-2 group B severity patients (red triangles) ( $R_2X=0.39$ , AUROC=0.91) inset. (B) Eruption plot of the controls vs group C severity group with the O-PLS-DA of controls (blue triangles) and SARS-CoV-2 group C severity patients (red triangles) ( $R_2X=0.27$ , AUROC=0.95) inset. (C) Eruption plot of the controls vs group D severity group with the O-PLS-DA of controls (blue triangles) and SARS-CoV-2 group D severity patients (red triangles) ( $R_2X=0.29$ , AUROC=0.97) inset. (D) Eruption plot of the controls vs group E severity group with the O-PLS-DA of controls (blue triangles) and SARS-CoV-2 group E severity patients (red triangles) ( $R_2X=0.36$ , AUROC=1.00) inset. Eruption plots are formed from the Cliff's delta (abscissa) and O-PLS-DA loadings (ordinate). Coloured by significance.

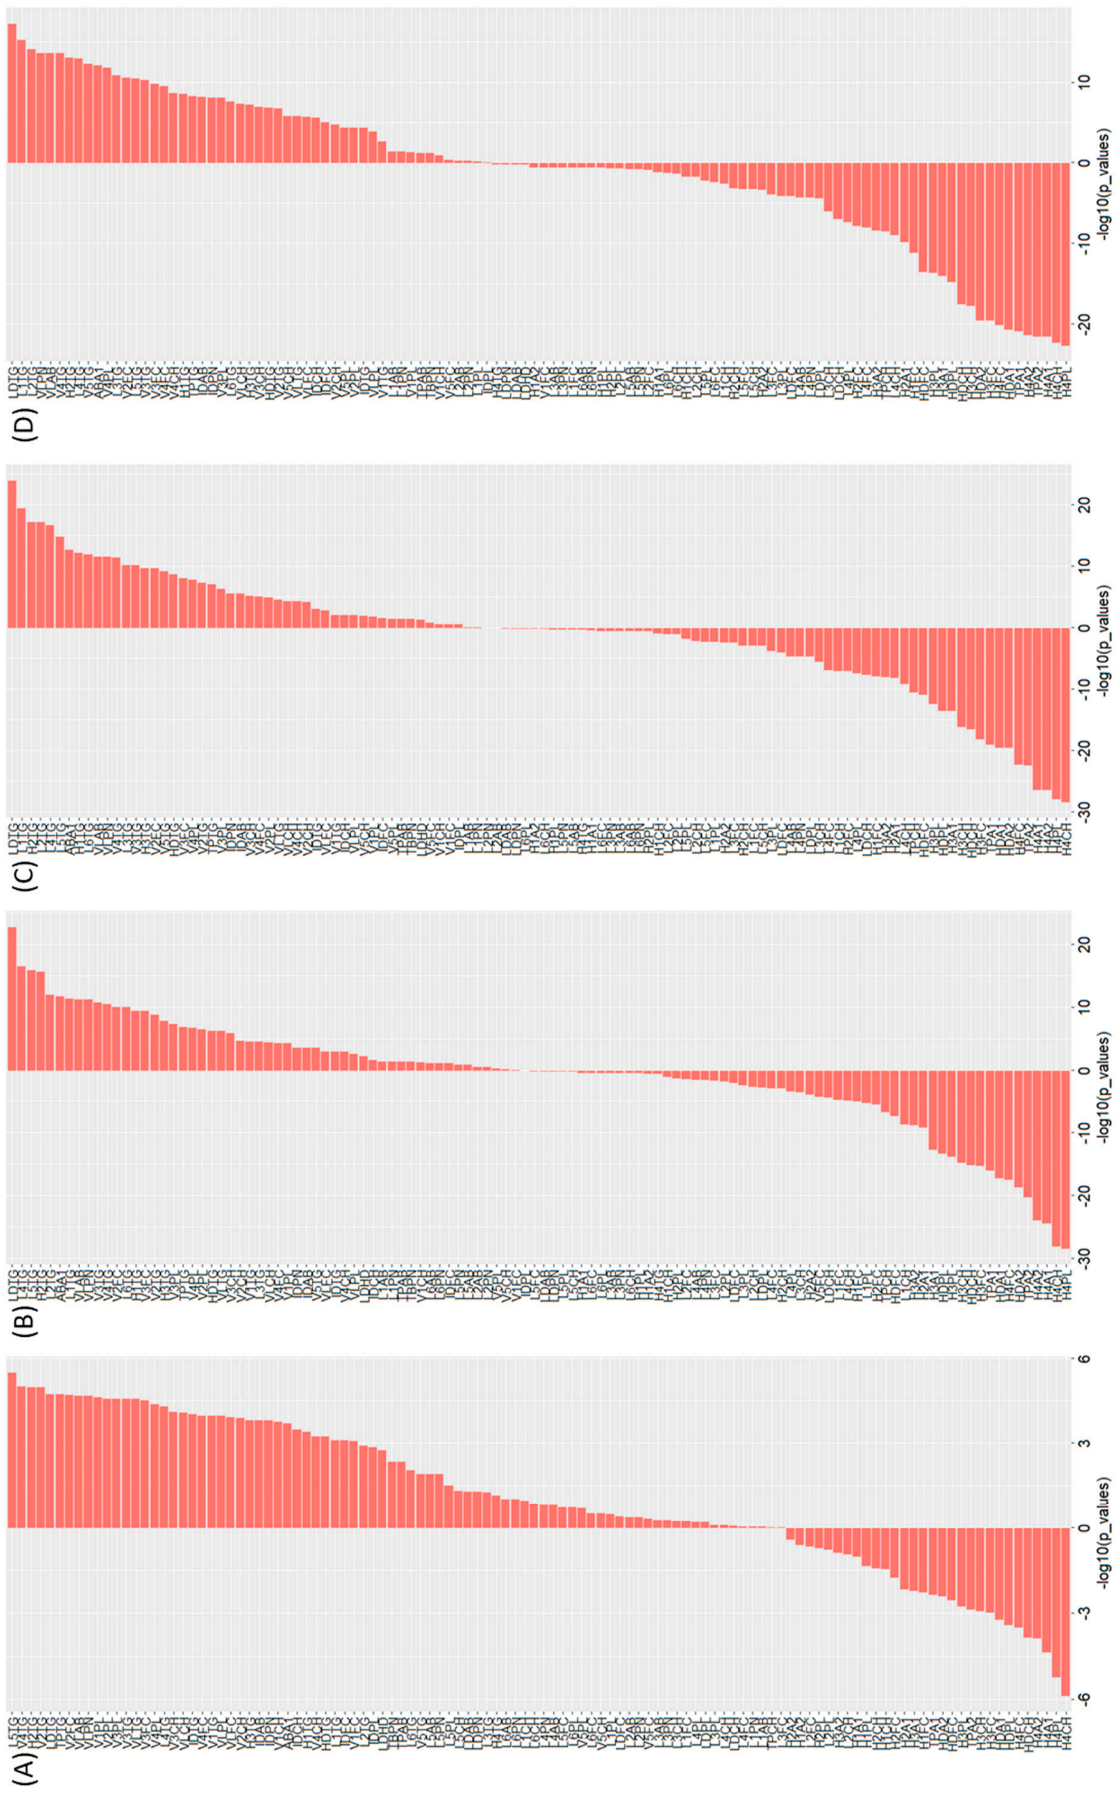

**Figure S6 -  $-\log_{10}$  (p-values) between controls and SARS-CoV-2 positive patients of each severity group for the lipoproteins.** (A) Controls vs group B severity. (B) Controls vs Group C severity. (D) Controls vs Group D severity. (E) Controls vs Group E severity.

**Table S10 - OPLS loadings, Cliff's delta and adjusted p-values of the lipoproteins for the comparison of the controls and SARS-CoV-2 positive patients in severity class B.** Only metabolites with significant p-values are shown in the table.

| Metabolite | OPLS loadings | Cliff's delta | Adjusted p-value      |
|------------|---------------|---------------|-----------------------|
| H4CH       | 0.141         | -0.87         | $1.57 \times 10^{-4}$ |
| L5TG       | 0.161         | 0.84          | $1.73 \times 10^{-4}$ |
| TPTG       | 0.103         | 0.77          | $1.79 \times 10^{-4}$ |
| VLPN       | 0.133         | 0.77          | $1.79 \times 10^{-4}$ |
| VLTG       | 0.096         | 0.76          | $1.79 \times 10^{-4}$ |
| LDTG       | 0.154         | 0.77          | $1.79 \times 10^{-4}$ |
| VLAB       | 0.133         | 0.77          | $1.79 \times 10^{-4}$ |
| V2TG       | 0.109         | 0.80          | $1.79 \times 10^{-4}$ |
| V3TG       | 0.124         | 0.76          | $1.79 \times 10^{-4}$ |
| V4TG       | 0.134         | 0.80          | $1.79 \times 10^{-4}$ |
| V2FC       | 0.120         | 0.77          | $1.79 \times 10^{-4}$ |
| V1PL       | 0.075         | 0.76          | $1.79 \times 10^{-4}$ |
| V2PL       | 0.107         | 0.76          | $1.79 \times 10^{-4}$ |
| V3PL       | 0.124         | 0.76          | $1.79 \times 10^{-4}$ |
| H2TG       | 0.128         | 0.80          | $1.79 \times 10^{-4}$ |
| H4PL       | 0.135         | -0.82         | $1.79 \times 10^{-4}$ |
| V3FC       | 0.117         | 0.75          | $1.97 \times 10^{-4}$ |
| V4PL       | 0.133         | 0.74          | $2.58 \times 10^{-4}$ |
| H4A1       | 0.124         | -0.74         | $2.58 \times 10^{-4}$ |
| L4TG       | 0.148         | 0.73          | $2.72 \times 10^{-4}$ |
| V3CH       | 0.119         | 0.72          | $3.93 \times 10^{-4}$ |
| VLCH       | 0.106         | 0.71          | $4.17 \times 10^{-4}$ |
| IDTG       | 0.089         | 0.71          | $4.32 \times 10^{-4}$ |
| VLPL       | 0.098         | 0.70          | $4.32 \times 10^{-4}$ |
| V1TG       | 0.074         | 0.70          | $4.32 \times 10^{-4}$ |
| V4FC       | 0.130         | 0.70          | $4.32 \times 10^{-4}$ |
| VLFC       | 0.099         | 0.70          | $4.84 \times 10^{-4}$ |
| V2CH       | 0.112         | 0.69          | $4.91 \times 10^{-4}$ |
| HDCH       | 0.114         | -0.68         | $5.09 \times 10^{-4}$ |

|      |       |       |                       |
|------|-------|-------|-----------------------|
| IDPN | 0.114 | 0.68  | 5.09x10 <sup>-4</sup> |
| IDAB | 0.144 | 0.68  | 5.09x10 <sup>-4</sup> |
| H3TG | 0.108 | 0.68  | 5.09x10 <sup>-4</sup> |
| H4A2 | 0.122 | -0.69 | 5.09x10 <sup>-4</sup> |
| V1CH | 0.073 | 0.68  | 5.45x10 <sup>-4</sup> |
| ABA1 | 0.157 | 0.67  | 6.08x10 <sup>-4</sup> |
| IDCH | 0.132 | 0.65  | 9.85x10 <sup>-4</sup> |
| H4FC | 0.117 | -0.65 | 9.85x10 <sup>-4</sup> |
| HDPL | 0.102 | -0.64 | 1.13x10 <sup>-3</sup> |
| H1TG | 0.111 | 0.64  | 1.13x10 <sup>-3</sup> |
| HDTG | 0.112 | 0.62  | 1.55x10 <sup>-3</sup> |
| V4CH | 0.117 | 0.62  | 1.55x10 <sup>-3</sup> |
| HDA1 | 0.108 | -0.62 | 1.66x10 <sup>-3</sup> |
| L1TG | 0.130 | 0.61  | 1.94x10 <sup>-3</sup> |
| IDFC | 0.127 | 0.61  | 1.98x10 <sup>-3</sup> |
| V1FC | 0.070 | 0.60  | 2.02x10 <sup>-3</sup> |
| H3FC | 0.106 | -0.59 | 2.69x10 <sup>-3</sup> |
| L2TG | 0.122 | 0.58  | 2.87x10 <sup>-3</sup> |
| H3CH | 0.108 | -0.58 | 2.94x10 <sup>-3</sup> |
| TPA2 | 0.107 | -0.58 | 3.07x10 <sup>-3</sup> |
| IDPL | 0.103 | 0.58  | 3.07x10 <sup>-3</sup> |
| LDHD | 0.141 | 0.56  | 3.81x10 <sup>-3</sup> |
| H3PL | 0.090 | -0.56 | 3.81x10 <sup>-3</sup> |
| HDFC | 0.102 | -0.54 | 6.36x10 <sup>-3</sup> |
| HDA2 | 0.096 | -0.52 | 8.24x10 <sup>-3</sup> |
| TPAB | 0.131 | 0.52  | 8.59x10 <sup>-3</sup> |
| TBPN | 0.131 | 0.52  | 8.59x10 <sup>-3</sup> |
| TPA1 | 0.100 | -0.51 | 9.12x10 <sup>-3</sup> |
| H1FC | 0.084 | -0.50 | 1.04x10 <sup>-2</sup> |
| H3A1 | 0.091 | -0.49 | 1.19x10 <sup>-2</sup> |
| H2A1 | 0.083 | -0.48 | 1.36x10 <sup>-2</sup> |
| L6TG | 0.121 | 0.47  | 1.60x10 <sup>-2</sup> |
| L5PN | 0.099 | 0.45  | 2.11x10 <sup>-2</sup> |
| V5TG | 0.079 | 0.45  | 2.11x10 <sup>-2</sup> |
| L5AB | 0.099 | 0.45  | 2.11x10 <sup>-2</sup> |
| H2FC | 0.090 | -0.42 | 3.22x10 <sup>-2</sup> |

**Table S11 - OPLS loadings, Cliff's delta and adjusted p-values of the lipoproteins for the comparison of the controls and SARS-CoV-2 positive patients in severity class C. Only metabolites with significant p-values are shown in the table.**

| Metabolite | OPLS loadings | Cliff's delta | Adjusted p-value       |
|------------|---------------|---------------|------------------------|
| H4CH       | 0.200         | -0.87         | $4.77 \times 10^{-27}$ |
| H4PL       | 0.195         | -0.88         | $4.77 \times 10^{-27}$ |
| H4A1       | 0.195         | -0.81         | $1.72 \times 10^{-23}$ |
| H4A2       | 0.193         | -0.81         | $3.19 \times 10^{-23}$ |
| LDTG       | 0.156         | 0.79          | $3.29 \times 10^{-23}$ |
| TPA2       | 0.193         | -0.74         | $1.24 \times 10^{-19}$ |
| HDA2       | 0.188         | -0.71         | $3.22 \times 10^{-18}$ |
| H4FC       | 0.192         | -0.68         | $4.81 \times 10^{-17}$ |
| HDA1       | 0.178         | -0.68         | $8.30 \times 10^{-17}$ |
| L4TG       | 0.135         | 0.66          | $3.07 \times 10^{-16}$ |
| TPA1       | 0.178         | -0.65         | $1.05 \times 10^{-15}$ |
| L5TG       | 0.131         | 0.65          | $1.05 \times 10^{-15}$ |
| H2TG       | 0.107         | 0.65          | $1.52 \times 10^{-15}$ |
| H3FC       | 0.183         | -0.64         | $4.79 \times 10^{-15}$ |
| HDCH       | 0.159         | -0.63         | $5.62 \times 10^{-15}$ |
| H3CH       | 0.178         | -0.62         | $1.44 \times 10^{-14}$ |
| H3PL       | 0.159         | -0.60         | $1.15 \times 10^{-13}$ |
| HDPL       | 0.148         | -0.59         | $3.56 \times 10^{-13}$ |
| H3A1       | 0.169         | -0.58         | $1.36 \times 10^{-12}$ |
| L2TG       | 0.139         | 0.56          | $4.71 \times 10^{-12}$ |
| ABA1       | 0.135         | 0.56          | $7.45 \times 10^{-12}$ |
| L1TG       | 0.131         | 0.55          | $1.83 \times 10^{-11}$ |
| VLPN       | 0.108         | 0.54          | $2.31 \times 10^{-11}$ |
| VLAB       | 0.108         | 0.54          | $2.31 \times 10^{-11}$ |
| V3TG       | 0.090         | 0.53          | $6.74 \times 10^{-11}$ |
| V4TG       | 0.099         | 0.52          | $1.29 \times 10^{-10}$ |
| V2FC       | 0.091         | 0.51          | $3.20 \times 10^{-10}$ |
| L6TG       | 0.105         | 0.51          | $3.64 \times 10^{-10}$ |
| V3FC       | 0.089         | 0.49          | $1.25 \times 10^{-9}$  |
| H1TG       | 0.088         | 0.49          | $1.25 \times 10^{-9}$  |
| H2A1       | 0.130         | -0.48         | $2.77 \times 10^{-9}$  |
| V2TG       | 0.071         | 0.47          | $5.31 \times 10^{-9}$  |
| H3A2       | 0.141         | -0.47         | $6.35 \times 10^{-9}$  |

|      |       |       |                       |
|------|-------|-------|-----------------------|
| L1CH | 0.067 | -0.47 | 6.99x10 <sup>-9</sup> |
| H3TG | 0.063 | 0.45  | 3.72x10 <sup>-8</sup> |
| V3PL | 0.085 | 0.43  | 1.29x10 <sup>-7</sup> |
| HDFC | 0.132 | -0.43 | 1.42x10 <sup>-7</sup> |
| TPTG | 0.060 | 0.42  | 3.60x10 <sup>-7</sup> |
| V4PL | 0.095 | 0.41  | 4.48x10 <sup>-7</sup> |
| TPCH | 0.109 | -0.41 | 5.74x10 <sup>-7</sup> |
| V2PL | 0.066 | 0.40  | 8.18x10 <sup>-7</sup> |
| HDTG | 0.060 | 0.40  | 1.26x10 <sup>-6</sup> |
| VLTG | 0.049 | 0.39  | 1.39x10 <sup>-6</sup> |
| V3CH | 0.078 | 0.38  | 2.77x10 <sup>-6</sup> |
| H2FC | 0.114 | -0.36 | 8.54x10 <sup>-6</sup> |
| L1PL | 0.037 | -0.35 | 1.71x10 <sup>-5</sup> |
| H1FC | 0.096 | -0.34 | 2.75x10 <sup>-5</sup> |
| L4CH | 0.103 | -0.34 | 3.61x10 <sup>-5</sup> |
| V2CH | 0.069 | 0.33  | 4.82x10 <sup>-5</sup> |
| L1FC | 0.044 | -0.33 | 4.85x10 <sup>-5</sup> |
| V1TG | 0.025 | 0.33  | 5.22x10 <sup>-5</sup> |
| L3TG | 0.094 | 0.33  | 6.05x10 <sup>-5</sup> |
| VLCH | 0.066 | 0.33  | 6.44x10 <sup>-5</sup> |
| V4FC | 0.079 | 0.32  | 8.42x10 <sup>-5</sup> |
| LDCH | 0.083 | -0.32 | 9.33x10 <sup>-5</sup> |
| V1PL | 0.031 | 0.32  | 9.91x10 <sup>-5</sup> |
| V5FC | 0.024 | -0.31 | 1.24x10 <sup>-4</sup> |
| H2A2 | 0.085 | -0.30 | 2.41x10 <sup>-4</sup> |
| IDPN | 0.083 | 0.29  | 5.12x10 <sup>-4</sup> |
| IDAB | 0.083 | 0.29  | 5.13x10 <sup>-4</sup> |
| V5TG | 0.050 | 0.29  | 5.13x10 <sup>-4</sup> |
| L3CH | 0.076 | -0.28 | 5.40x10 <sup>-4</sup> |
| L4PL | 0.093 | -0.28 | 7.32x10 <sup>-4</sup> |
| VLFC | 0.046 | 0.26  | 1.56x10 <sup>-3</sup> |
| IDTG | 0.031 | 0.26  | 1.67x10 <sup>-3</sup> |
| V4CH | 0.073 | 0.26  | 1.85x10 <sup>-3</sup> |
| H2CH | 0.088 | -0.25 | 2.02x10 <sup>-3</sup> |
| L4FC | 0.098 | -0.25 | 2.38x10 <sup>-3</sup> |
| LDPL | 0.064 | -0.25 | 2.58x10 <sup>-3</sup> |
| L2CH | 0.030 | -0.24 | 3.33x10 <sup>-3</sup> |

|      |       |       |                       |
|------|-------|-------|-----------------------|
| VLPL | 0.045 | 0.24  | $3.70 \times 10^{-3}$ |
| L3PL | 0.062 | -0.22 | $7.06 \times 10^{-3}$ |
| LDHD | 0.063 | 0.22  | $7.59 \times 10^{-3}$ |
| LDFC | 0.059 | -0.21 | $1.30 \times 10^{-2}$ |
| L2PL | 0.017 | -0.19 | $2.40 \times 10^{-2}$ |
| L3FC | 0.063 | -0.18 | $3.35 \times 10^{-2}$ |
| IDCH | 0.052 | 0.18  | $3.37 \times 10^{-2}$ |
| L4PN | 0.067 | -0.17 | $3.75 \times 10^{-2}$ |
| L4AB | 0.066 | -0.17 | $3.75 \times 10^{-2}$ |
| L1PN | 0.007 | -0.17 | $4.79 \times 10^{-2}$ |
| L1AB | 0.007 | -0.17 | $4.79 \times 10^{-2}$ |

**Table S12 - OPLS loadings, Cliff's delta and adjusted p-values of the lipoproteins for the comparison of the controls and SARS-CoV-2 positive patients in severity class D.** Only metabolites with significant p-values are shown in the table.

| Metabolite | OPLS loadings | Cliff's delta | Adjusted p-value       |
|------------|---------------|---------------|------------------------|
| H4CH       | 0.191         | -0.96         | $6.16 \times 10^{-27}$ |
| H4PL       | 0.189         | -0.95         | $8.95 \times 10^{-27}$ |
| H4A1       | 0.191         | -0.93         | $1.44 \times 10^{-25}$ |
| H4A2       | 0.186         | -0.93         | $1.44 \times 10^{-25}$ |
| LDTG       | 0.143         | 0.88          | $2.23 \times 10^{-23}$ |
| TPA2       | 0.179         | -0.85         | $8.89 \times 10^{-22}$ |
| H4FC       | 0.190         | -0.85         | $1.05 \times 10^{-21}$ |
| HDA1       | 0.173         | -0.79         | $3.96 \times 10^{-19}$ |
| HDA2       | 0.169         | -0.79         | $3.96 \times 10^{-19}$ |
| L1TG       | 0.131         | 0.79          | $3.96 \times 10^{-19}$ |
| TPA1       | 0.175         | -0.78         | $1.02 \times 10^{-18}$ |
| H3FC       | 0.178         | -0.76         | $7.79 \times 10^{-18}$ |
| H2TG       | 0.126         | 0.74          | $4.40 \times 10^{-17}$ |
| L2TG       | 0.132         | 0.74          | $4.46 \times 10^{-17}$ |
| L4TG       | 0.121         | 0.73          | $1.53 \times 10^{-16}$ |
| HDCH       | 0.151         | -0.73         | $2.40 \times 10^{-16}$ |
| H3CH       | 0.162         | -0.72         | $5.26 \times 10^{-16}$ |
| L5TG       | 0.117         | 0.69          | $7.42 \times 10^{-15}$ |
| H3A1       | 0.154         | -0.66         | $1.83 \times 10^{-13}$ |

|      |       |       |                        |
|------|-------|-------|------------------------|
| HDPL | 0.140 | -0.65 | $1.94 \times 10^{-13}$ |
| ABA1 | 0.126 | 0.63  | $9.32 \times 10^{-13}$ |
| H3PL | 0.139 | -0.62 | $2.01 \times 10^{-12}$ |
| H1TG | 0.111 | 0.62  | $3.20 \times 10^{-12}$ |
| L6TG | 0.106 | 0.61  | $5.25 \times 10^{-12}$ |
| VLPN | 0.103 | 0.60  | $1.01 \times 10^{-11}$ |
| VLAB | 0.103 | 0.60  | $1.01 \times 10^{-11}$ |
| V4TG | 0.096 | 0.60  | $1.19 \times 10^{-11}$ |
| HDFC | 0.140 | -0.58 | $5.71 \times 10^{-11}$ |
| TPCH | 0.125 | -0.57 | $1.28 \times 10^{-10}$ |
| L3TG | 0.101 | 0.57  | $1.92 \times 10^{-10}$ |
| V3TG | 0.086 | 0.56  | $2.03 \times 10^{-10}$ |
| H3TG | 0.090 | 0.55  | $5.73 \times 10^{-10}$ |
| V2FC | 0.091 | 0.55  | $6.11 \times 10^{-10}$ |
| V5TG | 0.083 | 0.53  | $1.72 \times 10^{-9}$  |
| L4CH | 0.125 | -0.53 | $2.58 \times 10^{-9}$  |
| HDTG | 0.090 | 0.52  | $5.28 \times 10^{-9}$  |
| V3FC | 0.081 | 0.50  | $2.15 \times 10^{-8}$  |
| H2A1 | 0.115 | -0.50 | $2.20 \times 10^{-8}$  |
| H3A2 | 0.114 | -0.49 | $3.34 \times 10^{-8}$  |
| H1FC | 0.106 | -0.49 | $3.53 \times 10^{-8}$  |
| V4PL | 0.091 | 0.49  | $4.21 \times 10^{-8}$  |
| LDCH | 0.109 | -0.48 | $7.00 \times 10^{-8}$  |
| L4PL | 0.116 | -0.47 | $1.09 \times 10^{-7}$  |
| V2TG | 0.068 | 0.47  | $1.09 \times 10^{-7}$  |
| TPTG | 0.060 | 0.46  | $1.70 \times 10^{-7}$  |
| H2FC | 0.112 | -0.46 | $2.27 \times 10^{-7}$  |
| L1CH | 0.044 | -0.46 | $2.48 \times 10^{-7}$  |
| L4FC | 0.123 | -0.45 | $3.27 \times 10^{-7}$  |
| V3PL | 0.078 | 0.43  | $1.03 \times 10^{-6}$  |
| IDPN | 0.082 | 0.41  | $5.58 \times 10^{-6}$  |
| IDAB | 0.082 | 0.40  | $5.58 \times 10^{-6}$  |
| L3CH | 0.091 | -0.40 | $7.83 \times 10^{-6}$  |
| V3CH | 0.071 | 0.39  | $1.15 \times 10^{-5}$  |
| V4FC | 0.081 | 0.38  | $1.61 \times 10^{-5}$  |
| V2PL | 0.062 | 0.38  | $2.12 \times 10^{-5}$  |
| VLTG | 0.048 | 0.36  | $4.51 \times 10^{-5}$  |

|      |       |       |                       |
|------|-------|-------|-----------------------|
| LDPL | 0.087 | -0.36 | 4.81x10 <sup>-5</sup> |
| L4PN | 0.092 | -0.36 | 5.16x10 <sup>-5</sup> |
| L4AB | 0.092 | -0.36 | 5.16x10 <sup>-5</sup> |
| VLCH | 0.064 | 0.35  | 8.33x10 <sup>-5</sup> |
| V4CH | 0.074 | 0.35  | 8.76x10 <sup>-5</sup> |
| V2CH | 0.067 | 0.35  | 9.56x10 <sup>-5</sup> |
| LDFC | 0.086 | -0.33 | 2.08x10 <sup>-4</sup> |
| L3PL | 0.075 | -0.32 | 3.46x10 <sup>-4</sup> |
| IDTG | 0.038 | 0.29  | 1.27x10 <sup>-3</sup> |
| VLFC | 0.049 | 0.28  | 2.00x10 <sup>-3</sup> |
| L5CH | 0.083 | -0.28 | 2.05x10 <sup>-3</sup> |
| L1FC | 0.025 | -0.28 | 2.27x10 <sup>-3</sup> |
| H2CH | 0.075 | -0.27 | 2.56x10 <sup>-3</sup> |
| L3FC | 0.073 | -0.25 | 6.16x10 <sup>-3</sup> |
| H2A2 | 0.065 | -0.25 | 6.30x10 <sup>-3</sup> |
| L1PL | 0.005 | -0.24 | 8.14x10 <sup>-3</sup> |
| L5FC | 0.088 | -0.24 | 8.65x10 <sup>-3</sup> |
| V1TG | 0.029 | 0.23  | 1.00x10 <sup>-2</sup> |
| L2CH | 0.031 | -0.23 | 1.16x10 <sup>-2</sup> |
| IDCH | 0.054 | 0.23  | 1.17x10 <sup>-2</sup> |
| VLPL | 0.044 | 0.23  | 1.21x10 <sup>-2</sup> |
| V5CH | 0.044 | 0.22  | 1.40x10 <sup>-2</sup> |
| V1PL | 0.031 | 0.21  | 1.82x10 <sup>-2</sup> |
| L5PL | 0.070 | -0.20 | 2.61x10 <sup>-2</sup> |
| IDFC | 0.048 | 0.19  | 3.52x10 <sup>-2</sup> |
| V5PL | 0.030 | 0.19  | 4.21x10 <sup>-2</sup> |
| TPAB | 0.016 | 0.18  | 4.73x10 <sup>-2</sup> |
| TBPN | 0.016 | 0.18  | 4.73x10 <sup>-2</sup> |

**Table S13 - OPLS loadings, Cliff's delta and adjusted p-values of the lipoproteins for the comparison of the controls and SARS-CoV-2 positive patients in severity class E.** Only metabolites with significant p-values are shown in the table.

| Metabolite | OPLS loadings | Cliff's delta | Adjusted p-value       |
|------------|---------------|---------------|------------------------|
| H4PL       | 0.165         | -0.98         | 2.70x10 <sup>-21</sup> |
| H4CH       | 0.166         | -0.97         | 3.01x10 <sup>-21</sup> |
| TPA2       | 0.158         | -0.95         | 7.83x10 <sup>-21</sup> |

|      |       |       |                        |
|------|-------|-------|------------------------|
| H4A1 | 0.167 | -0.95 | $7.83 \times 10^{-21}$ |
| H4A2 | 0.161 | -0.95 | $1.02 \times 10^{-20}$ |
| TPA1 | 0.160 | -0.94 | $2.39 \times 10^{-20}$ |
| HDA1 | 0.158 | -0.93 | $3.32 \times 10^{-20}$ |
| H4FC | 0.166 | -0.92 | $1.06 \times 10^{-19}$ |
| HDA2 | 0.150 | -0.91 | $3.57 \times 10^{-19}$ |
| H3FC | 0.163 | -0.91 | $3.57 \times 10^{-19}$ |
| H3CH | 0.148 | -0.86 | $2.11 \times 10^{-17}$ |
| HDCH | 0.140 | -0.86 | $3.02 \times 10^{-17}$ |
| LDTG | 0.144 | 0.85  | $4.11 \times 10^{-17}$ |
| L1TG | 0.145 | 0.80  | $4.36 \times 10^{-15}$ |
| HDPL | 0.129 | -0.78 | $1.36 \times 10^{-14}$ |
| L2TG | 0.142 | 0.76  | $5.23 \times 10^{-14}$ |
| H3A1 | 0.134 | -0.76 | $6.97 \times 10^{-14}$ |
| VLPN | 0.124 | 0.75  | $1.16 \times 10^{-13}$ |
| VLAB | 0.124 | 0.75  | $1.16 \times 10^{-13}$ |
| V4TG | 0.121 | 0.75  | $1.16 \times 10^{-13}$ |
| H3PL | 0.124 | -0.75 | $1.31 \times 10^{-13}$ |
| HDFC | 0.138 | -0.75 | $1.47 \times 10^{-13}$ |
| H2TG | 0.119 | 0.74  | $3.52 \times 10^{-13}$ |
| L4TG | 0.127 | 0.73  | $4.65 \times 10^{-13}$ |
| V5TG | 0.116 | 0.71  | $2.18 \times 10^{-12}$ |
| ABA1 | 0.120 | 0.70  | $3.23 \times 10^{-12}$ |
| V4PL | 0.120 | 0.70  | $6.23 \times 10^{-12}$ |
| H1FC | 0.112 | -0.67 | $2.92 \times 10^{-11}$ |
| L3TG | 0.121 | 0.67  | $4.92 \times 10^{-11}$ |
| V2FC | 0.098 | 0.66  | $8.04 \times 10^{-11}$ |
| L5TG | 0.107 | 0.65  | $9.96 \times 10^{-11}$ |
| V3TG | 0.096 | 0.65  | $1.55 \times 10^{-10}$ |
| V3FC | 0.099 | 0.63  | $5.03 \times 10^{-10}$ |
| H2A1 | 0.102 | -0.63 | $5.03 \times 10^{-10}$ |
| V4FC | 0.115 | 0.62  | $7.93 \times 10^{-10}$ |
| L4CH | 0.110 | -0.60 | $3.78 \times 10^{-9}$  |
| V4CH | 0.111 | 0.59  | $6.08 \times 10^{-9}$  |
| H1TG | 0.108 | 0.59  | $7.39 \times 10^{-9}$  |
| TPCH | 0.110 | -0.58 | $9.54 \times 10^{-9}$  |
| TPTG | 0.088 | 0.58  | $1.34 \times 10^{-8}$  |

|      |       |       |                       |
|------|-------|-------|-----------------------|
| H3A2 | 0.099 | -0.58 | 1.34x10 <sup>-8</sup> |
| IDAB | 0.113 | 0.57  | 1.70x10 <sup>-8</sup> |
| IDPN | 0.113 | 0.57  | 1.74x10 <sup>-8</sup> |
| V3PL | 0.091 | 0.57  | 2.04x10 <sup>-8</sup> |
| L4FC | 0.114 | -0.56 | 2.94x10 <sup>-8</sup> |
| H2FC | 0.102 | -0.55 | 4.38x10 <sup>-8</sup> |
| L6TG | 0.091 | 0.55  | 5.66x10 <sup>-8</sup> |
| VLCH | 0.090 | 0.54  | 9.94x10 <sup>-8</sup> |
| L4PL | 0.101 | -0.54 | 1.10x10 <sup>-7</sup> |
| H3TG | 0.085 | 0.54  | 1.10x10 <sup>-7</sup> |
| V3CH | 0.085 | 0.52  | 2.06x10 <sup>-7</sup> |
| LDCH | 0.103 | -0.52 | 2.59x10 <sup>-7</sup> |
| HDTG | 0.094 | 0.52  | 2.60x10 <sup>-7</sup> |
| V2TG | 0.068 | 0.52  | 3.31x10 <sup>-7</sup> |
| L3CH | 0.087 | -0.48 | 2.18x10 <sup>-6</sup> |
| V5CH | 0.097 | 0.48  | 2.62x10 <sup>-6</sup> |
| VLTG | 0.063 | 0.47  | 2.97x10 <sup>-6</sup> |
| VLFC | 0.075 | 0.47  | 3.75x10 <sup>-6</sup> |
| IDCH | 0.094 | 0.47  | 3.91x10 <sup>-6</sup> |
| IDFC | 0.089 | 0.44  | 1.55x10 <sup>-5</sup> |
| V2CH | 0.063 | 0.42  | 2.86x10 <sup>-5</sup> |
| V2PL | 0.055 | 0.41  | 6.40x10 <sup>-5</sup> |
| V5PL | 0.083 | 0.41  | 6.40x10 <sup>-5</sup> |
| IDTG | 0.050 | 0.40  | 7.17x10 <sup>-5</sup> |
| IDPL | 0.083 | -0.40 | 7.19x10 <sup>-5</sup> |
| L4PN | 0.077 | -0.40 | 9.02x10 <sup>-5</sup> |
| L4AB | 0.077 | -0.40 | 9.02x10 <sup>-5</sup> |
| LDFC | 0.083 | -0.39 | 1.37x10 <sup>-4</sup> |
| L3PL | 0.072 | -0.39 | 1.41x10 <sup>-4</sup> |
| VLPL | 0.061 | 0.38  | 1.69x10 <sup>-4</sup> |
| L3FC | 0.080 | -0.37 | 2.18x10 <sup>-4</sup> |
| H2A2 | 0.051 | -0.34 | 7.86x10 <sup>-4</sup> |
| L5CH | 0.075 | -0.34 | 9.84x10 <sup>-4</sup> |
| L5FC | 0.085 | -0.33 | 1.02x10 <sup>-3</sup> |
| H2CH | 0.064 | -0.33 | 1.21x10 <sup>-3</sup> |
| V1TG | 0.029 | 0.30  | 3.04x10 <sup>-3</sup> |
| L1CH | 0.026 | -0.30 | 3.84x10 <sup>-3</sup> |

|      |       |       |                       |
|------|-------|-------|-----------------------|
| L6FC | 0.078 | -0.28 | $6.97 \times 10^{-3}$ |
| L5PL | 0.069 | -0.26 | $1.10 \times 10^{-2}$ |
| L2CH | 0.037 | -0.23 | $2.76 \times 10^{-2}$ |
| H1CH | 0.045 | -0.23 | $2.76 \times 10^{-2}$ |
| L1PN | 0.066 | 0.21  | $4.32 \times 10^{-2}$ |
| L1AB | 0.066 | 0.21  | $4.32 \times 10^{-2}$ |

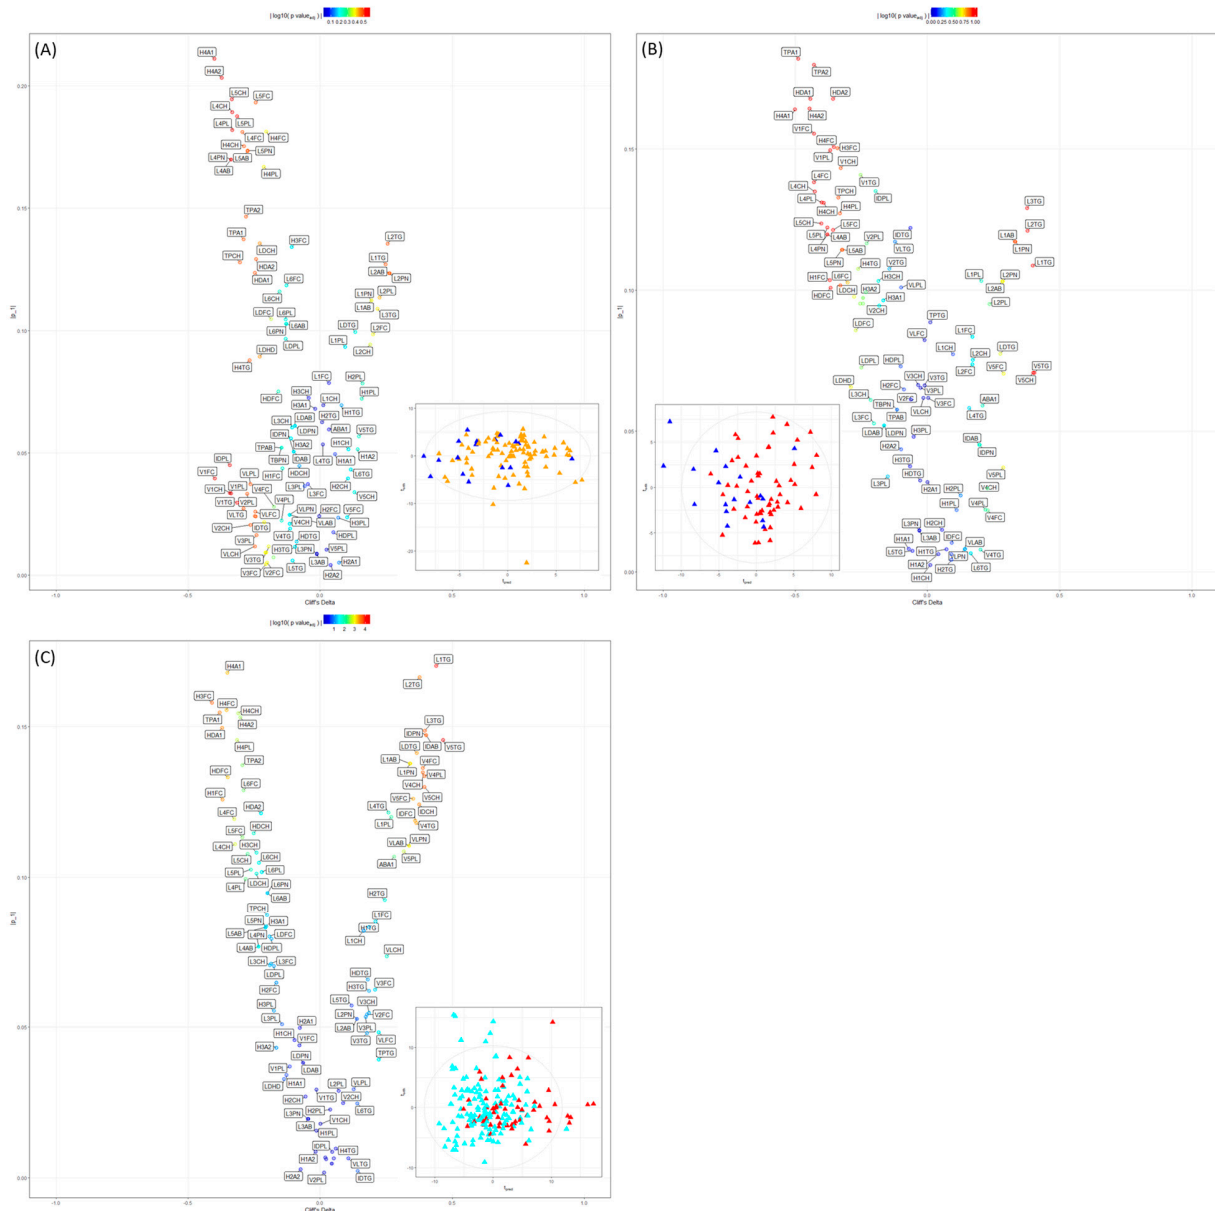

**Figure S8 - Orthogonal Partial Least Squared (O-PLS-DA) and eruption plots between different severity classes of SARS-CoV-2 positive patients for the lipoproteins. (A) O-PLS-DA SARS-CoV-2 severity group B (blue) and SARS-CoV-2 severity group D (orange) ( $R^2X=0.18$ ,  $AUROC=0.64$ ) and eruption plot. (B) O-PLS-DA SARS-CoV-2 severity group B**

(blue) and SARS-CoV-2 severity group E (red) ( $R_2X=0.21$ , AUROC=0.70) and eruption plot. (C) O-PLS-DA SARS-CoV-2 severity group C (cyan) and SARS-CoV-2 severity group E (red) ( $R_2X=0.28$ , AUROC=0.72) and eruption plot. Significant models could not be produced for severity group B vs C, group C vs D or D vs E.

**Table S14 - OPLS loadings, Cliff's delta and adjusted p-values of the lipoproteins for the comparison of severity class C and E.** Only metabolites with significant p-values are shown in the table.

| Metabolite | OPLS loadings | Cliff's delta | Adjusted p-value      |
|------------|---------------|---------------|-----------------------|
| V5TG       | 0.146         | 0.47          | $3.50 \times 10^{-5}$ |
| L1TG       | 0.170         | 0.44          | $7.69 \times 10^{-5}$ |
| IDPN       | 0.147         | 0.40          | $2.00 \times 10^{-4}$ |
| IDAB       | 0.147         | 0.40          | $2.00 \times 10^{-4}$ |
| V5CH       | 0.130         | 0.40          | $2.00 \times 10^{-4}$ |
| V4PL       | 0.134         | 0.40          | $2.00 \times 10^{-4}$ |
| L3TG       | 0.149         | 0.40          | $2.00 \times 10^{-4}$ |
| H3FC       | 0.158         | -0.41         | $2.00 \times 10^{-4}$ |
| V4CH       | 0.135         | 0.39          | $2.20 \times 10^{-4}$ |
| V4FC       | 0.136         | 0.39          | $2.20 \times 10^{-4}$ |
| TPA1       | 0.155         | -0.38         | $3.08 \times 10^{-4}$ |
| L2TG       | 0.166         | 0.38          | $3.26 \times 10^{-4}$ |
| IDCH       | 0.124         | 0.37          | $3.40 \times 10^{-4}$ |
| HDA1       | 0.150         | -0.37         | $3.58 \times 10^{-4}$ |
| H1FC       | 0.126         | -0.37         | $3.65 \times 10^{-4}$ |
| LDTG       | 0.141         | 0.37          | $4.20 \times 10^{-4}$ |
| V4TG       | 0.118         | 0.36          | $4.20 \times 10^{-4}$ |
| V5FC       | 0.126         | 0.35          | $4.57 \times 10^{-4}$ |
| IDFC       | 0.119         | 0.36          | $4.58 \times 10^{-4}$ |
| H4FC       | 0.156         | -0.35         | $5.42 \times 10^{-4}$ |
| H4A1       | 0.168         | -0.35         | $6.02 \times 10^{-4}$ |
| HDFC       | 0.133         | -0.35         | $6.15 \times 10^{-4}$ |
| L1PN       | 0.138         | 0.34          | $8.71 \times 10^{-4}$ |
| L1AB       | 0.138         | 0.34          | $9.64 \times 10^{-4}$ |
| VLPN       | 0.110         | 0.34          | $9.64 \times 10^{-4}$ |
| VLAB       | 0.110         | 0.34          | $9.64 \times 10^{-4}$ |
| L4FC       | 0.119         | -0.33         | $1.46 \times 10^{-3}$ |
| L4CH       | 0.111         | -0.32         | $1.53 \times 10^{-3}$ |
| V5PL       | 0.109         | 0.32          | $1.91 \times 10^{-3}$ |
| H4PL       | 0.146         | -0.31         | $2.08 \times 10^{-3}$ |
| H4CH       | 0.154         | -0.31         | $2.39 \times 10^{-3}$ |

|      |       |       |                       |
|------|-------|-------|-----------------------|
| H4A2 | 0.153 | -0.30 | $3.07 \times 10^{-3}$ |
| TPA2 | 0.137 | -0.29 | $4.04 \times 10^{-3}$ |
| L5FC | 0.113 | -0.29 | $4.04 \times 10^{-3}$ |
| L6FC | 0.129 | -0.29 | $4.70 \times 10^{-3}$ |
| L4PL | 0.099 | -0.28 | $5.81 \times 10^{-3}$ |
| ABA1 | 0.107 | 0.28  | $6.27 \times 10^{-3}$ |
| L5CH | 0.108 | -0.27 | $7.41 \times 10^{-3}$ |
| L1PL | 0.120 | 0.27  | $8.88 \times 10^{-3}$ |
| L5PL | 0.103 | -0.26 | $1.09 \times 10^{-2}$ |
| L4TG | 0.121 | 0.26  | $1.26 \times 10^{-2}$ |
| HDCH | 0.115 | -0.25 | $1.49 \times 10^{-2}$ |
| VLCH | 0.073 | 0.25  | $1.49 \times 10^{-2}$ |
| H2TG | 0.092 | 0.24  | $1.87 \times 10^{-2}$ |
| LDCH | 0.101 | -0.24 | $1.98 \times 10^{-2}$ |
| H3CH | 0.108 | -0.24 | $2.00 \times 10^{-2}$ |
| L4PN | 0.077 | -0.23 | $2.47 \times 10^{-2}$ |
| L4AB | 0.077 | -0.23 | $2.47 \times 10^{-2}$ |
| L6CH | 0.105 | -0.23 | $2.51 \times 10^{-2}$ |
| HDA2 | 0.121 | -0.22 | $3.07 \times 10^{-2}$ |
| TPTG | 0.039 | 0.22  | $3.14 \times 10^{-2}$ |
| VLFC | 0.048 | 0.22  | $3.14 \times 10^{-2}$ |
| L6PL | 0.102 | -0.22 | $3.14 \times 10^{-2}$ |
| L1FC | 0.085 | 0.21  | $4.35 \times 10^{-2}$ |
| L5PN | 0.083 | -0.21 | $4.56 \times 10^{-2}$ |
| V3FC | 0.062 | 0.21  | $4.56 \times 10^{-2}$ |
| L5AB | 0.083 | -0.21 | $4.56 \times 10^{-2}$ |
| H3A1 | 0.083 | -0.20 | $4.81 \times 10^{-2}$ |

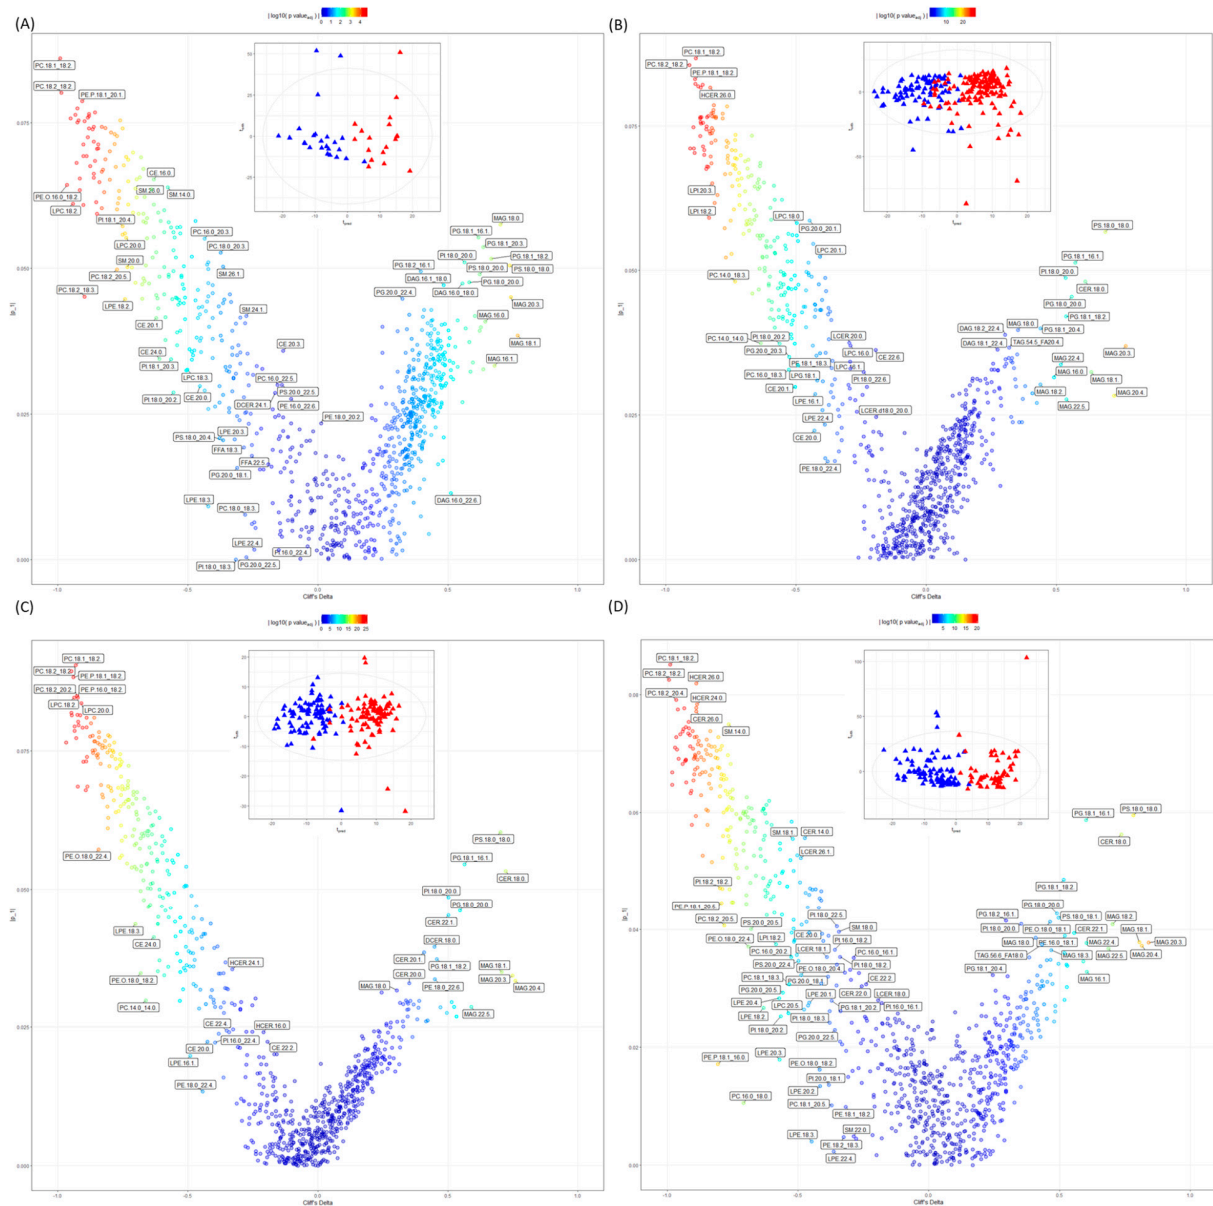

**Figure S9 - Orthogonal Partial Least Squared (O-PLS-DA) and eruption plots between controls and SARS-CoV-2 positive patients of each severity group for the Lipids.** (A) Eruption plot of the controls vs group B severity group with the O-PLS-DA of controls (blue triangles) and SARS-CoV-2 group B severity patients (red triangles) ( $R^2X=0.22$ , AUROC=0.98) inset. (B) Eruption plot of the controls vs group C severity group with the O-PLS-DA of controls (blue triangles) and SARS-CoV-2 group C severity patients (red triangles) ( $R^2X=0.18$ , AUROC=0.97) inset. (C) Eruption plot of the controls vs group D severity group with the O-PLS-DA of controls (blue triangles) and SARS-CoV-2 group D severity patients (red triangles) ( $R^2X=0.12$ , AUROC=0.99) inset. (D) Eruption plot of the controls vs group E severity group with the O-PLS-DA of controls (blue triangles) and SARS-CoV-2 group E severity patients (red triangles) ( $R^2X=0.21$ , AUROC=0.99) inset.

**Table S15 - OPLS loadings, Cliff's delta and adjusted p-values of the lipids for the comparison of the controls and SARS-CoV-2 positive patients in severity class B.** Only the 50 most significant adjusted p-values are shown.

| Metabolite         | OPLS loadings | Cliff's delta | Adjusted p-value      |
|--------------------|---------------|---------------|-----------------------|
| PC (18:1/18:2)     | 0.086         | -0.99         | 2.00x10 <sup>-5</sup> |
| PC (18:2/18:2)     | 0.080         | -0.99         | 2.00x10 <sup>-5</sup> |
| PE.O (16:0/18:2)   | 0.064         | -0.96         | 2.65x10 <sup>-5</sup> |
| HCER.d (18:0/18:0) | 0.075         | -0.92         | 2.85x10 <sup>-5</sup> |
| LPC (18:2)         | 0.061         | -0.94         | 2.85x10 <sup>-5</sup> |
| PE.O (16:0/20:4)   | 0.063         | -0.92         | 2.85x10 <sup>-5</sup> |
| PE.P (16:0/18:2)   | 0.077         | -0.92         | 2.85x10 <sup>-5</sup> |
| PE.P (16:0/18:3)   | 0.065         | -0.92         | 2.85x10 <sup>-5</sup> |
| PE.P (18:0/18:2)   | 0.076         | -0.93         | 2.85x10 <sup>-5</sup> |
| PE.P (18:0/20:1)   | 0.075         | -0.92         | 2.85x10 <sup>-5</sup> |
| PE.P (18:1/18:2)   | 0.076         | -0.95         | 2.85x10 <sup>-5</sup> |
| PE.P (18:2/20:4)   | 0.068         | -0.93         | 2.85x10 <sup>-5</sup> |
| PC (18:2/20:2)     | 0.061         | -0.90         | 3.14x10 <sup>-5</sup> |
| PE.O (18:0/22:5)   | 0.071         | -0.90         | 3.14x10 <sup>-5</sup> |
| PE.P (18:1/20:1)   | 0.079         | -0.91         | 3.14x10 <sup>-5</sup> |
| PE.P (18:1/20:4)   | 0.069         | -0.90         | 3.14x10 <sup>-5</sup> |
| PC (18:2/18:3)     | 0.045         | -0.90         | 3.17x10 <sup>-5</sup> |
| PC (18:2/20:4)     | 0.075         | -0.90         | 3.17x10 <sup>-5</sup> |
| HCER (22:0)        | 0.069         | -0.89         | 3.87x10 <sup>-5</sup> |
| PC (16:0/18:2)     | 0.076         | -0.88         | 3.93x10 <sup>-5</sup> |
| PC (20:0/20:4)     | 0.074         | -0.88         | 3.93x10 <sup>-5</sup> |
| PE.O (16:0/20:1)   | 0.073         | -0.88         | 3.93x10 <sup>-5</sup> |
| PE.P (18:0/18:1)   | 0.077         | -0.88         | 3.93x10 <sup>-5</sup> |
| PE.P (18:1/22:5)   | 0.076         | -0.88         | 3.93x10 <sup>-5</sup> |
| PE.O (18:0/22:4)   | 0.068         | -0.88         | 4.28x10 <sup>-5</sup> |
| PC (18:0/20:1)     | 0.074         | -0.87         | 5.16x10 <sup>-5</sup> |
| PE.O (16:0/18:1)   | 0.066         | -0.86         | 5.16x10 <sup>-5</sup> |
| PE.P (16:0/22:5)   | 0.074         | -0.86         | 5.16x10 <sup>-5</sup> |
| PE.P (18:0/20:4)   | 0.066         | -0.86         | 5.16x10 <sup>-5</sup> |
| PE.P (18:1/22:4)   | 0.072         | -0.86         | 5.16x10 <sup>-5</sup> |
| PE.P (18:0/22:5)   | 0.068         | -0.86         | 5.46x10 <sup>-5</sup> |
| PE.P (18:2/18:2)   | 0.068         | -0.86         | 5.46x10 <sup>-5</sup> |
| PE.O (16:0/22:5)   | 0.061         | -0.85         | 5.98x10 <sup>-5</sup> |

|                    |       |       |                       |
|--------------------|-------|-------|-----------------------|
| PE.O (16:0/22:6)   | 0.059 | -0.85 | 6.36x10 <sup>-5</sup> |
| PE.P (18:0/22:4)   | 0.071 | -0.85 | 6.36x10 <sup>-5</sup> |
| PC (20:0/18:1)     | 0.071 | -0.84 | 6.79x10 <sup>-5</sup> |
| PE.P (18:0/18:0)   | 0.071 | -0.84 | 6.79x10 <sup>-5</sup> |
| PE.P (16:0/20:4)   | 0.065 | -0.84 | 7.45x10 <sup>-5</sup> |
| HCER.d (18:0/22:0) | 0.067 | -0.83 | 8.76x10 <sup>-5</sup> |
| PE.P (16:0/20:1)   | 0.074 | -0.83 | 8.76x10 <sup>-5</sup> |
| PE.P (18:1/16:0)   | 0.060 | -0.83 | 8.76x10 <sup>-5</sup> |
| PE.P (18:0/16:0)   | 0.067 | -0.83 | 9.62x10 <sup>-5</sup> |
| PC (20:0/20:3)     | 0.063 | -0.82 | 1.06x10 <sup>-4</sup> |
| PC (18:2/20:3)     | 0.069 | -0.82 | 1.14x10 <sup>-4</sup> |
| PE.P (18:1/18:1)   | 0.074 | -0.82 | 1.14x10 <sup>-4</sup> |
| PC (18:2/22:6)     | 0.065 | -0.80 | 1.72x10 <sup>-4</sup> |
| PE.P (18:0/20:2)   | 0.070 | -0.80 | 1.72x10 <sup>-4</sup> |
| PC (16:0/20:1)     | 0.073 | -0.80 | 1.89x10 <sup>-4</sup> |
| HCER.d (18:0/24:0) | 0.073 | -0.78 | 2.55x10 <sup>-4</sup> |
| PE.P (16:0/18:1)   | 0.071 | -0.78 | 2.55x10 <sup>-4</sup> |

**Table S16 - OPLS loadings, Cliff's delta and adjusted p-values of the lipids for the comparison of the controls and SARS-CoV-2 positive patients in severity class C.** Only the 50 most significant adjusted p-values are shown.

| Metabolite         | OPLS loadings | Cliff's delta | Adjusted p-value       |
|--------------------|---------------|---------------|------------------------|
| PC (18:2/18:2)     | 0.086         | -0.91         | 3.47x10 <sup>-28</sup> |
| PE.O (16:0/20:4)   | 0.071         | -0.91         | 3.47x10 <sup>-28</sup> |
| PE.O (16:0/18:2)   | 0.075         | -0.89         | 1.24x10 <sup>-27</sup> |
| PE.P (18:2/20:4)   | 0.071         | -0.89         | 1.24x10 <sup>-27</sup> |
| PE.P (16:0/22:5)   | 0.070         | -0.89         | 1.75x10 <sup>-27</sup> |
| PE.P (16:0/18:2)   | 0.082         | -0.89         | 1.78x10 <sup>-27</sup> |
| PE.P (18:1/18:2)   | 0.083         | -0.89         | 1.78x10 <sup>-27</sup> |
| PC (18:1/18:2)     | 0.087         | -0.88         | 2.16x10 <sup>-27</sup> |
| PE.P (18:0/18:2)   | 0.082         | -0.88         | 6.43x10 <sup>-27</sup> |
| HCER.d (18:0/18:0) | 0.076         | -0.87         | 1.56x10 <sup>-26</sup> |
| PE.O (16:0/18:1)   | 0.073         | -0.87         | 1.56x10 <sup>-26</sup> |
| PE.O (16:0/20:1)   | 0.076         | -0.87         | 1.56x10 <sup>-26</sup> |
| PE.P (18:0/18:1)   | 0.082         | -0.87         | 1.76x10 <sup>-26</sup> |

|                    |       |       |                        |
|--------------------|-------|-------|------------------------|
| PE.P (18:0/22:5)   | 0.076 | -0.87 | 1.76x10 <sup>-26</sup> |
| PE.P (18:1/20:4)   | 0.075 | -0.87 | 1.80x10 <sup>-26</sup> |
| PC (18:2/20:2)     | 0.076 | -0.86 | 2.43x10 <sup>-26</sup> |
| PE.P (16:0/20:1)   | 0.082 | -0.86 | 4.43x10 <sup>-26</sup> |
| LPC (18:2)         | 0.076 | -0.86 | 4.58x10 <sup>-26</sup> |
| PC (18:2/20:3)     | 0.071 | -0.86 | 4.64x10 <sup>-26</sup> |
| PE.O (18:0/22:5)   | 0.070 | -0.85 | 8.09x10 <sup>-26</sup> |
| PE.P (16:0/20:4)   | 0.071 | -0.85 | 8.09x10 <sup>-26</sup> |
| PC (20:0/20:3)     | 0.074 | -0.84 | 2.26x10 <sup>-25</sup> |
| PE.P (18:0/22:4)   | 0.068 | -0.84 | 2.26x10 <sup>-25</sup> |
| PE.P (18:2/18:2)   | 0.075 | -0.84 | 2.65x10 <sup>-25</sup> |
| PC (18:0/20:1)     | 0.076 | -0.84 | 2.78x10 <sup>-25</sup> |
| PE.O (18:0/22:4)   | 0.068 | -0.84 | 2.80x10 <sup>-25</sup> |
| PE.P (18:0/20:1)   | 0.077 | -0.84 | 4.80x10 <sup>-25</sup> |
| LPI (18:1)         | 0.068 | -0.84 | 4.94x10 <sup>-25</sup> |
| LPI (18:2)         | 0.059 | -0.83 | 6.95x10 <sup>-25</sup> |
| PE.P (18:1/22:5)   | 0.074 | -0.83 | 9.14x10 <sup>-25</sup> |
| HCER (26:0)        | 0.082 | -0.83 | 1.15x10 <sup>-24</sup> |
| PE.P (18:0/20:3)   | 0.074 | -0.83 | 1.19x10 <sup>-24</sup> |
| PE.P (16:0/18:3)   | 0.070 | -0.83 | 1.35x10 <sup>-24</sup> |
| PE.P (18:0/20:4)   | 0.072 | -0.83 | 1.94x10 <sup>-24</sup> |
| PE.O (16:0/22:5)   | 0.069 | -0.82 | 2.09x10 <sup>-24</sup> |
| PE.P (18:0/20:2)   | 0.077 | -0.82 | 2.09x10 <sup>-24</sup> |
| HCER (22:0)        | 0.075 | -0.82 | 2.46x10 <sup>-24</sup> |
| HCER.d (18:0/22:0) | 0.074 | -0.82 | 2.46x10 <sup>-24</sup> |
| LPI (20:3)         | 0.065 | -0.82 | 2.55x10 <sup>-24</sup> |
| PE.P (18:0/18:0)   | 0.077 | -0.82 | 2.55x10 <sup>-24</sup> |
| PC (20:0/18:1)     | 0.074 | -0.82 | 4.27x10 <sup>-24</sup> |
| PE.P (18:1/18:1)   | 0.077 | -0.82 | 4.36x10 <sup>-24</sup> |
| PC (18:2/20:4)     | 0.078 | -0.82 | 4.95x10 <sup>-24</sup> |
| LPC (20:0)         | 0.079 | -0.82 | 5.75x10 <sup>-24</sup> |
| HCER.d (18:0/24:0) | 0.077 | -0.81 | 7.44x10 <sup>-24</sup> |
| PE.P (18:1/22:4)   | 0.062 | -0.81 | 8.83x10 <sup>-24</sup> |
| PI (18:1/18:1)     | 0.072 | -0.81 | 1.22x10 <sup>-23</sup> |
| PE.P (18:0/16:0)   | 0.076 | -0.81 | 1.33x10 <sup>-23</sup> |
| HCER (24:0)        | 0.077 | -0.81 | 1.48x10 <sup>-23</sup> |
| PC (18:2/18:3)     | 0.063 | -0.80 | 3.23x10 <sup>-23</sup> |

**Table S17 - OPLS loadings, Cliff's delta and adjusted p-values of the lipids for the comparison of the controls and SARS-CoV-2 positive patients in severity class D. Only the 50 most significant adjusted p-values are shown.**

| Metabolite         | OPLS loadings | Cliff's delta | Adjusted p-value       |
|--------------------|---------------|---------------|------------------------|
| PE.O (16:0/20:4)   | 0.077         | -0.97         | 1.91x10 <sup>-26</sup> |
| PC (18:2/18:2)     | 0.089         | -0.95         | 8.63x10 <sup>-26</sup> |
| PE.P (18:1/20:4)   | 0.082         | -0.95         | 8.63x10 <sup>-26</sup> |
| PE.P (18:2/20:4)   | 0.081         | -0.95         | 8.63x10 <sup>-26</sup> |
| PE.P (18:1/18:2)   | 0.088         | -0.94         | 1.56x10 <sup>-25</sup> |
| LPC (18:2)         | 0.085         | -0.94         | 1.76x10 <sup>-25</sup> |
| PE.P (16:0/20:4)   | 0.079         | -0.94         | 1.76x10 <sup>-25</sup> |
| PE.P (16:0/22:5)   | 0.079         | -0.94         | 1.76x10 <sup>-25</sup> |
| PC (18:1/18:2)     | 0.090         | -0.93         | 2.91x10 <sup>-25</sup> |
| PE.O (16:0/18:2)   | 0.077         | -0.93         | 2.97x10 <sup>-25</sup> |
| PC (18:1/20:2)     | 0.085         | -0.93         | 3.67x10 <sup>-25</sup> |
| PE.P (18:0/18:2)   | 0.081         | -0.92         | 4.58x10 <sup>-25</sup> |
| PC (18:2/18:3)     | 0.069         | -0.92         | 4.78x10 <sup>-25</sup> |
| PE.P (16:0/18:2)   | 0.085         | -0.92         | 4.98x10 <sup>-25</sup> |
| PE.P (18:0/22:5)   | 0.080         | -0.92         | 4.98x10 <sup>-25</sup> |
| PC (18:2/20:3)     | 0.080         | -0.92         | 5.97x10 <sup>-25</sup> |
| PE.P (18:2/18:2)   | 0.081         | -0.91         | 1.28x10 <sup>-24</sup> |
| LPC (20:0)         | 0.084         | -0.91         | 1.85x10 <sup>-24</sup> |
| PE.P (18:1/22:5)   | 0.079         | -0.91         | 3.30x10 <sup>-24</sup> |
| PE.O (16:0/22:5)   | 0.073         | -0.90         | 4.92x10 <sup>-24</sup> |
| PE.O (16:0/18:1)   | 0.068         | -0.89         | 1.46x10 <sup>-23</sup> |
| PE.O (18:0/22:5)   | 0.073         | -0.89         | 1.71x10 <sup>-23</sup> |
| PE.P (18:0/20:4)   | 0.079         | -0.89         | 1.84x10 <sup>-23</sup> |
| PE.P (18:0/18:1)   | 0.081         | -0.89         | 1.87x10 <sup>-23</sup> |
| PC (20:0/20:3)     | 0.074         | -0.89         | 2.02x10 <sup>-23</sup> |
| PE.P (16:0/18:3)   | 0.069         | -0.89         | 2.54x10 <sup>-23</sup> |
| PC (18:2/20:4)     | 0.078         | -0.88         | 8.13x10 <sup>-23</sup> |
| HCER.d (18:0/18:0) | 0.080         | -0.87         | 1.08x10 <sup>-22</sup> |
| PE.O (16:0/20:1)   | 0.075         | -0.87         | 2.15x10 <sup>-22</sup> |
| PI (20:0/18:2)     | 0.078         | -0.87         | 2.33x10 <sup>-22</sup> |
| PE.P (18:1/22:4)   | 0.075         | -0.87         | 2.46x10 <sup>-22</sup> |
| LPC (20:3)         | 0.077         | -0.86         | 4.35x10 <sup>-22</sup> |
| PE.P (16:0/20:1)   | 0.081         | -0.86         | 4.35x10 <sup>-22</sup> |

|                  |       |       |                        |
|------------------|-------|-------|------------------------|
| PE.P (18:0/16:0) | 0.077 | -0.86 | 5.62x10 <sup>-22</sup> |
| PE.P (18:0/22:4) | 0.075 | -0.86 | 5.95x10 <sup>-22</sup> |
| PI (18:1/18:1)   | 0.074 | -0.85 | 1.11x10 <sup>-21</sup> |
| PE.P (18:0/20:3) | 0.074 | -0.85 | 1.70x10 <sup>-21</sup> |
| SM (24:0)        | 0.076 | -0.85 | 1.70x10 <sup>-21</sup> |
| PC (18:0/20:1)   | 0.074 | -0.85 | 1.91x10 <sup>-21</sup> |
| PE.O (18:0/22:4) | 0.057 | -0.84 | 2.61x10 <sup>-21</sup> |
| PE.P (18:1/18:1) | 0.078 | -0.84 | 2.77x10 <sup>-21</sup> |
| PE.P (18:0/20:1) | 0.077 | -0.84 | 3.03x10 <sup>-21</sup> |
| PE.P (18:0/18:0) | 0.076 | -0.84 | 4.02x10 <sup>-21</sup> |
| PE.P (16:0/22:4) | 0.073 | -0.84 | 5.05x10 <sup>-21</sup> |
| LPI (20:3)       | 0.069 | -0.83 | 6.35x10 <sup>-21</sup> |
| PE.P (18:0/20:2) | 0.075 | -0.83 | 1.05x10 <sup>-20</sup> |
| LPC (18:3)       | 0.067 | -0.83 | 1.09x10 <sup>-20</sup> |
| LPC (18:1)       | 0.076 | -0.83 | 1.16x10 <sup>-20</sup> |
| SM (20:0)        | 0.067 | -0.83 | 1.34x10 <sup>-20</sup> |
| PC (18:2/22:6)   | 0.077 | -0.82 | 3.24x10 <sup>-20</sup> |

**Table S18 - OPLS loadings, Cliff's delta and adjusted p-values of the lipids for the comparison of the controls and SARS-CoV-2 positive patients in severity class E.** Only the 50 most significant adjusted p values are shown.

| Metabolite       | OPLS loadings | Cliff's delta | Adjusted p-value       |
|------------------|---------------|---------------|------------------------|
| PC (18:1/18:2)   | 0.085         | -0.99         | 3.35x10 <sup>-21</sup> |
| PC (18:2/18:2)   | 0.082         | -0.99         | 3.35x10 <sup>-21</sup> |
| PE.O (16:0/20:4) | 0.065         | -0.98         | 4.10x10 <sup>-21</sup> |
| PE.P (18:2/20:4) | 0.067         | -0.98         | 4.10x10 <sup>-21</sup> |
| PC (20:0/20:3)   | 0.071         | -0.97         | 9.70x10 <sup>-21</sup> |
| PC (18:2/20:3)   | 0.073         | -0.97         | 9.93x10 <sup>-21</sup> |
| PC (18:2/20:4)   | 0.079         | -0.97         | 9.93x10 <sup>-21</sup> |
| PE.P (18:1/20:4) | 0.071         | -0.96         | 1.19x10 <sup>-20</sup> |
| PE.P (16:0/18:2) | 0.077         | -0.96         | 1.52x10 <sup>-20</sup> |
| LPC (18:2)       | 0.069         | -0.96         | 2.03x10 <sup>-20</sup> |
| PE.P (16:0/22:5) | 0.073         | -0.95         | 2.95x10 <sup>-20</sup> |
| PE.P (18:1/18:2) | 0.074         | -0.94         | 6.91x10 <sup>-20</sup> |
| PE.P (16:0/20:4) | 0.068         | -0.94         | 7.16x10 <sup>-20</sup> |

|                    |       |       |                        |
|--------------------|-------|-------|------------------------|
| PE.P (18:0/22:5)   | 0.074 | -0.94 | $8.07 \times 10^{-20}$ |
| PC (18:0/20:1)     | 0.078 | -0.94 | $1.03 \times 10^{-19}$ |
| PE.P (18:2/18:2)   | 0.069 | -0.93 | $1.41 \times 10^{-19}$ |
| PE.P (18:0/20:3)   | 0.069 | -0.93 | $1.58 \times 10^{-19}$ |
| PE.P (18:0/20:4)   | 0.069 | -0.93 | $1.58 \times 10^{-19}$ |
| PE.P (18:0/18:2)   | 0.074 | -0.93 | $1.62 \times 10^{-19}$ |
| PE.O (16:0/22:5)   | 0.065 | -0.93 | $1.73 \times 10^{-19}$ |
| HCER (22:0)        | 0.075 | -0.92 | $3.49 \times 10^{-19}$ |
| PC (18:2/22:5)     | 0.073 | -0.92 | $3.49 \times 10^{-19}$ |
| HCER.d (18:0/22:0) | 0.074 | -0.92 | $4.19 \times 10^{-19}$ |
| LPC (20:0)         | 0.073 | -0.91 | $5.04 \times 10^{-19}$ |
| PE.P (18:0/22:4)   | 0.071 | -0.91 | $5.84 \times 10^{-19}$ |
| PI (20:0/18:2)     | 0.063 | -0.91 | $6.05 \times 10^{-19}$ |
| PE.O (16:0/18:2)   | 0.064 | -0.91 | $8.49 \times 10^{-19}$ |
| PE.P (16:0/18:3)   | 0.058 | -0.91 | $8.82 \times 10^{-19}$ |
| PE.P (16:0/20:1)   | 0.074 | -0.90 | $1.28 \times 10^{-18}$ |
| PC (18:2/22:6)     | 0.071 | -0.90 | $1.39 \times 10^{-18}$ |
| PC (18:2/20:2)     | 0.065 | -0.90 | $1.45 \times 10^{-18}$ |
| PE.O (16:0/20:1)   | 0.069 | -0.90 | $1.75 \times 10^{-18}$ |
| PE.P (18:1/22:4)   | 0.066 | -0.90 | $1.90 \times 10^{-18}$ |
| PE.P (18:0/16:0)   | 0.073 | -0.90 | $2.14 \times 10^{-18}$ |
| PE.P (18:1/22:5)   | 0.069 | -0.89 | $2.15 \times 10^{-18}$ |
| PE.P (16:0/22:4)   | 0.067 | -0.89 | $2.17 \times 10^{-18}$ |
| PE.P (18:0/20:1)   | 0.070 | -0.89 | $2.19 \times 10^{-18}$ |
| HCER.d (18:0/18:0) | 0.070 | -0.89 | $2.47 \times 10^{-18}$ |
| SM (20:0)          | 0.059 | -0.89 | $2.90 \times 10^{-18}$ |
| CER (26:0)         | 0.077 | -0.89 | $3.00 \times 10^{-18}$ |
| HCER (26:0)        | 0.082 | -0.89 | $3.00 \times 10^{-18}$ |
| HCER.d (18:0/24:0) | 0.078 | -0.89 | $3.00 \times 10^{-18}$ |
| SM (24:0)          | 0.073 | -0.89 | $3.28 \times 10^{-18}$ |
| HCER (24:0)        | 0.078 | -0.89 | $3.99 \times 10^{-18}$ |
| PE.P (18:0/20:2)   | 0.069 | -0.89 | $4.05 \times 10^{-18}$ |
| PC (14:0/20:4)     | 0.068 | -0.88 | $4.26 \times 10^{-18}$ |
| PI (18:1/20:4)     | 0.072 | -0.88 | $4.65 \times 10^{-18}$ |
| PC (16:1/18:2)     | 0.070 | -0.88 | $6.09 \times 10^{-18}$ |
| PE.P (18:0/18:1)   | 0.072 | -0.88 | $6.42 \times 10^{-18}$ |
| PI (20:0/20:4)     | 0.066 | -0.87 | $9.72 \times 10^{-18}$ |

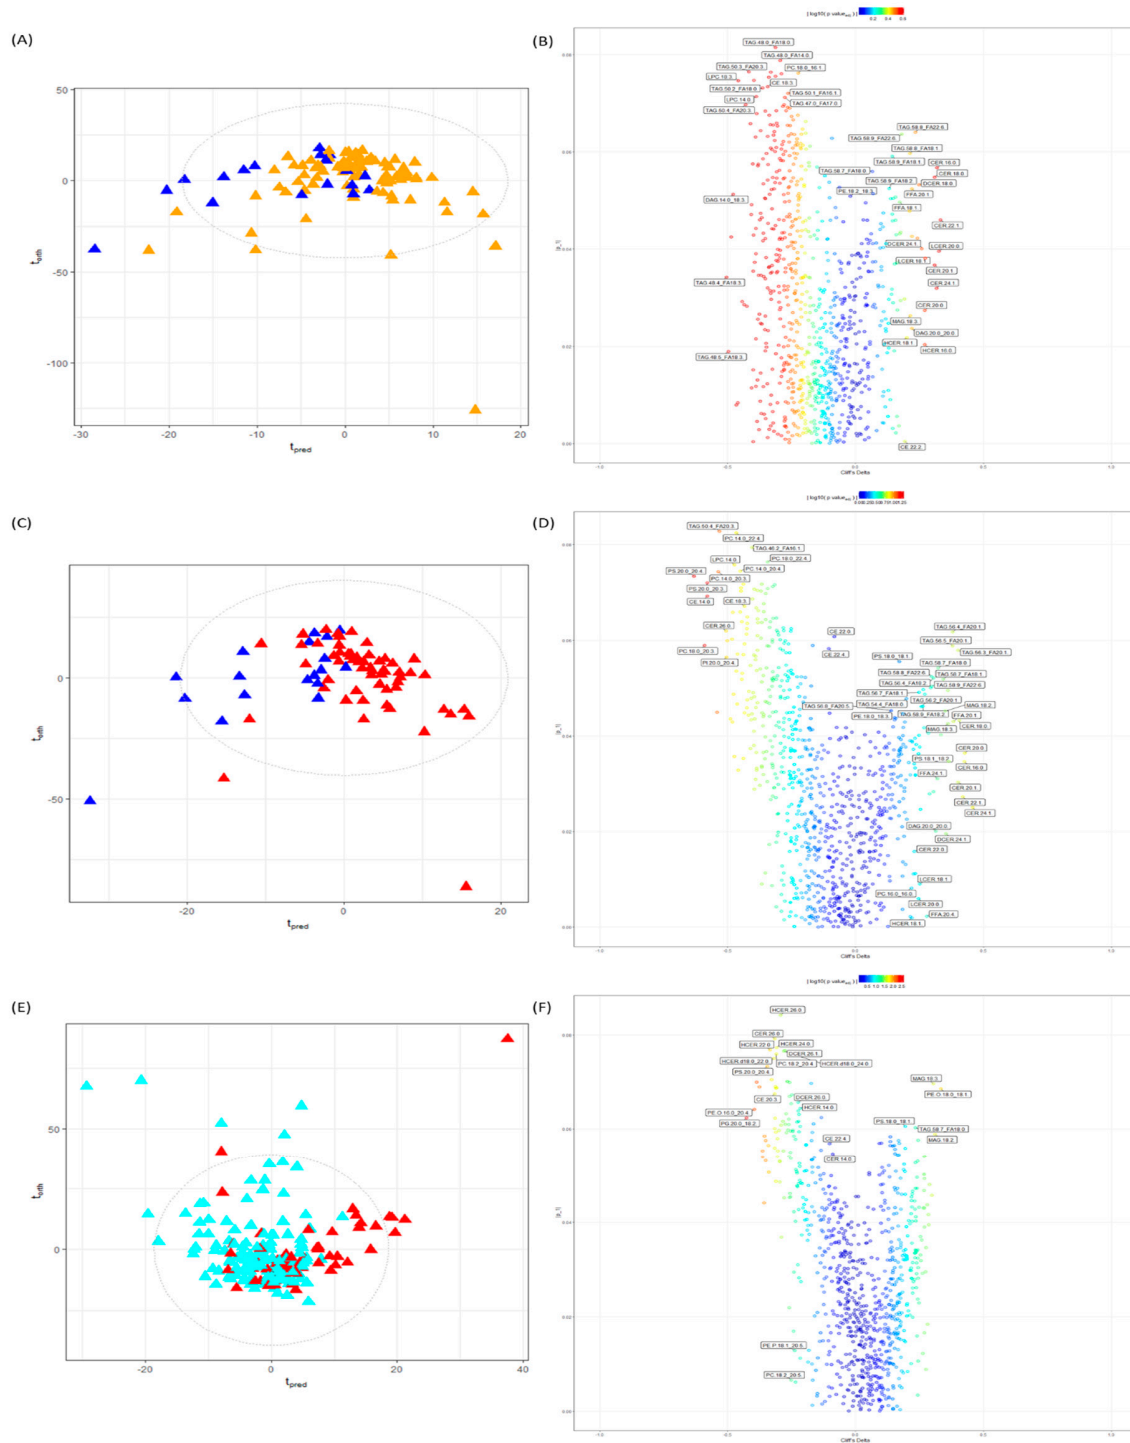

**Figure S10 - Orthogonal Partial Least Squared (O-PLS-DA) and eruption plots between different severity classes of SARS-CoV-2 positive patients for the lipids.** (A) O-PLS-DA SARS-CoV-2 severity group B (blue) and SARS-CoV-2 severity group D (orange) ( $R^2X=0.16$ ,  $AUROC=0.64$ ). (B) Eruption plot of severity group B vs severity group D. (C) O-

PLS-DA SARS-CoV-2 severity group B (blue) and SARS-CoV-2 severity group E (red) ( $R_2X=0.15$ , AUROC=0.79). (D) Eruption plot of severity group B vs severity group E. (E) O-PLS-DA SARS-CoV-2 severity group C (cyan) and SARS-CoV-2 severity group E (red) ( $R_2X=0.13$ , AUROC=0.72). Significant models could not be produced for severity group B vs C, group C vs D or D vs E.

**Table S19 - OPLS loadings, Cliff's delta and adjusted p-values of the lipids for the comparison of severity class B and E.** Only metabolites with significant p-values are shown in the table.

| Lipid          | OPLS loadings | Cliff's delta | Adjusted p-value      |
|----------------|---------------|---------------|-----------------------|
| CE (14:0)      | 0.069         | -0.58         | $4.96 \times 10^{-2}$ |
| PC (18:0/20:3) | 0.059         | -0.59         | $4.96 \times 10^{-2}$ |
| PS (20:0/20:3) | 0.072         | -0.58         | $4.96 \times 10^{-2}$ |
| PC (20:0/20:4) | 0.073         | -0.63         | $4.96 \times 10^{-2}$ |

**Table S20 - OPLS loadings, Cliff's delta and adjusted p-values of the lipids for the comparison of severity class C and E.** Only metabolites with significant p-values are shown in the table.

| Lipid            | OPLS loadings | Cliff's delta | Adjusted p-value      |
|------------------|---------------|---------------|-----------------------|
| PG (20:0/18:2)   | 0.062         | -0.43         | $2.39 \times 10^{-3}$ |
| PE.O (16:0/20:4) | 0.064         | -0.40         | $6.14 \times 10^{-3}$ |
| PE.P (18:0/20:3) | 0.070         | -0.39         | $6.18 \times 10^{-3}$ |
| PI (20:0/20:4)   | 0.069         | -0.38         | $7.94 \times 10^{-3}$ |
| PC (18:0/20:3)   | 0.054         | -0.36         | $9.36 \times 10^{-3}$ |
| PE.P (16:0/20:3) | 0.055         | -0.36         | $9.36 \times 10^{-3}$ |
| PG (20:0/20:3)   | 0.044         | -0.36         | $9.83 \times 10^{-3}$ |
| PS (20:0/22:6)   | 0.058         | -0.36         | $9.83 \times 10^{-3}$ |
| PI (20:0/16:1)   | 0.058         | -0.35         | $9.99 \times 10^{-3}$ |
| PI (20:0/18:2)   | 0.053         | -0.35         | $9.99 \times 10^{-3}$ |
| PS (20:0/20:4)   | 0.073         | -0.34         | $1.21 \times 10^{-2}$ |
| PE.P (18:1/20:3) | 0.056         | -0.34         | $1.30 \times 10^{-2}$ |
| PE (18:2/16:1)   | 0.051         | -0.34         | $1.33 \times 10^{-2}$ |
| HCER (22:0)      | 0.077         | -0.33         | $1.46 \times 10^{-2}$ |
| PE.O (18:0/18:1) | 0.069         | 0.33          | $1.46 \times 10^{-2}$ |
| LPC (20:0)       | 0.071         | -0.33         | $1.68 \times 10^{-2}$ |
| CE (16:0)        | 0.062         | -0.31         | $2.00 \times 10^{-2}$ |
| CE (20:3)        | 0.067         | -0.32         | $2.00 \times 10^{-2}$ |
| CER (26:0)       | 0.079         | -0.32         | $2.00 \times 10^{-2}$ |
| HCER (24:0)      | 0.077         | -0.31         | $2.00 \times 10^{-2}$ |

|                      |       |       |                       |
|----------------------|-------|-------|-----------------------|
| HCER.d (18:0/22:0)   | 0.075 | -0.32 | 2.00x10 <sup>-2</sup> |
| LPC (14:0)           | 0.069 | -0.31 | 2.00x10 <sup>-2</sup> |
| LPC (16:0)           | 0.059 | -0.31 | 2.00x10 <sup>-2</sup> |
| LPC (18:0)           | 0.069 | -0.31 | 2.00x10 <sup>-2</sup> |
| MAG (18:2)           | 0.059 | 0.31  | 2.00x10 <sup>-2</sup> |
| PC (18:2/18:2)       | 0.069 | -0.31 | 2.00x10 <sup>-2</sup> |
| PC (18:2/20:4)       | 0.076 | -0.31 | 2.00x10 <sup>-2</sup> |
| PC (18:2/22:6)       | 0.060 | -0.32 | 2.00x10 <sup>-2</sup> |
| PE.P (18:0/22:6)     | 0.049 | -0.31 | 2.00x10 <sup>-2</sup> |
| SM (22:1)            | 0.056 | -0.32 | 2.00x10 <sup>-2</sup> |
| MAG (18:3)           | 0.070 | 0.30  | 2.15x10 <sup>-2</sup> |
| PC (18:2/20:3)       | 0.054 | -0.31 | 2.15x10 <sup>-2</sup> |
| PE.P (18:2/20:4)     | 0.058 | -0.31 | 2.15x10 <sup>-2</sup> |
| PS (20:0/20:3)       | 0.055 | -0.30 | 2.15x10 <sup>-2</sup> |
| PC (18:0/18:2)       | 0.060 | -0.30 | 2.45x10 <sup>-2</sup> |
| TAG (56:3)_FA (20:1) | 0.046 | 0.30  | 2.45x10 <sup>-2</sup> |
| PI (18:0/20:4)       | 0.049 | -0.30 | 2.54x10 <sup>-2</sup> |
| SM (20:1)            | 0.053 | -0.30 | 2.45x10 <sup>-2</sup> |
| PG (20:0/20:1)       | 0.053 | -0.30 | 2.58x10 <sup>-2</sup> |
| HCER (26:0)          | 0.084 | -0.29 | 2.77x10 <sup>-2</sup> |
| PC (14:0/22:6)       | 0.061 | -0.29 | 2.83x10 <sup>-2</sup> |
| PG (20:0/18:1)       | 0.037 | -0.29 | 2.94x10 <sup>-2</sup> |
| TAG (56:4)_FA (20:1) | 0.048 | 0.29  | 2.94x10 <sup>-2</sup> |
| TAG (56:2)_FA (18:1) | 0.042 | 0.28  | 3.37x10 <sup>-2</sup> |
| SM (24:0)            | 0.062 | -0.28 | 3.42x10 <sup>-2</sup> |
| PE.P (16:0/22:6)     | 0.055 | -0.28 | 3.45x10 <sup>-2</sup> |
| CER (16:0)           | 0.018 | 0.28  | 3.50x10 <sup>-2</sup> |
| HCER.d (18:0/24:0)   | 0.077 | -0.28 | 3.50x10 <sup>-2</sup> |
| PC (16:0/22:6)       | 0.045 | -0.28 | 3.55x10 <sup>-2</sup> |
| TAG (56:4)_FA (18:2) | 0.044 | 0.28  | 3.55x10 <sup>-2</sup> |
| CER (24:1)           | 0.009 | 0.28  | 3.93x10 <sup>-2</sup> |
| DCER (26:1)          | 0.077 | -0.28 | 3.93x10 <sup>-2</sup> |
| PE.P (18:0/20:4)     | 0.061 | -0.28 | 3.93x10 <sup>-2</sup> |
| TAG (56:2)_FA (18:0) | 0.035 | 0.28  | 3.93x10 <sup>-2</sup> |
| TAG (55:4)_FA (18:1) | 0.030 | 0.27  | 4.15x10 <sup>-2</sup> |
| CER (20:0)           | 0.017 | 0.27  | 4.18x10 <sup>-2</sup> |
| FFA (20:1)           | 0.050 | 0.27  | 4.18x10 <sup>-2</sup> |

|                      |       |       |                       |
|----------------------|-------|-------|-----------------------|
| HCER (20:0)          | 0.063 | -0.27 | $4.18 \times 10^{-2}$ |
| MAG (18:1)           | 0.054 | 0.27  | $4.18 \times 10^{-2}$ |
| PC (18:1/20:4)       | 0.059 | -0.27 | $4.18 \times 10^{-2}$ |
| PE (16:0/18:1)       | 0.047 | 0.27  | $4.18 \times 10^{-2}$ |
| TAG (54:3)_FA (18:0) | 0.039 | 0.27  | $4.18 \times 10^{-2}$ |
| TAG (56:3)_FA (18:0) | 0.043 | 0.27  | $4.18 \times 10^{-2}$ |
| TAG (56:7)_FA (18:1) | 0.054 | 0.27  | $4.18 \times 10^{-2}$ |
| TAG (58:7)_FA (18:1) | 0.049 | 0.27  | $4.18 \times 10^{-2}$ |
| PS (18:1/18:2)       | 0.050 | 0.27  | $4.19 \times 10^{-2}$ |
| PC (18:0/22:4)       | 0.070 | -0.27 | $4.28 \times 10^{-2}$ |
| CE (22:5)            | 0.070 | -0.26 | $4.47 \times 10^{-2}$ |
| TAG (58:3)_FA (18:1) | 0.043 | 0.27  | $4.47 \times 10^{-2}$ |
| HCER.d (18:0/20:0)   | 0.060 | -0.26 | $4.48 \times 10^{-2}$ |
| CER (22:1)           | 0.012 | 0.26  | $4.54 \times 10^{-2}$ |
| PE.P (18:1/20:4)     | 0.062 | -0.26 | $4.74 \times 10^{-2}$ |
| TAG (55:3)_FA (18:1) | 0.029 | 0.26  | $4.74 \times 10^{-2}$ |
| LPC (20:4)           | 0.054 | -0.26 | $4.84 \times 10^{-2}$ |
| PE.P (16:0/20:4)     | 0.061 | -0.26 | $4.84 \times 10^{-3}$ |
| PE.P (16:0/20:5)     | 0.022 | -0.26 | $4.84 \times 10^{-3}$ |
| PC (14:0/20:4)       | 0.070 | -0.30 | $4.89 \times 10^{-3}$ |
| PC (20:0/20:4)       | 0.067 | -0.26 | $4.89 \times 10^{-3}$ |
| PC (18:0/20:2)       | 0.036 | 0.26  | $4.89 \times 10^{-3}$ |
| PE.P (18:2/18:2)     | 0.045 | -0.26 | $4.89 \times 10^{-3}$ |

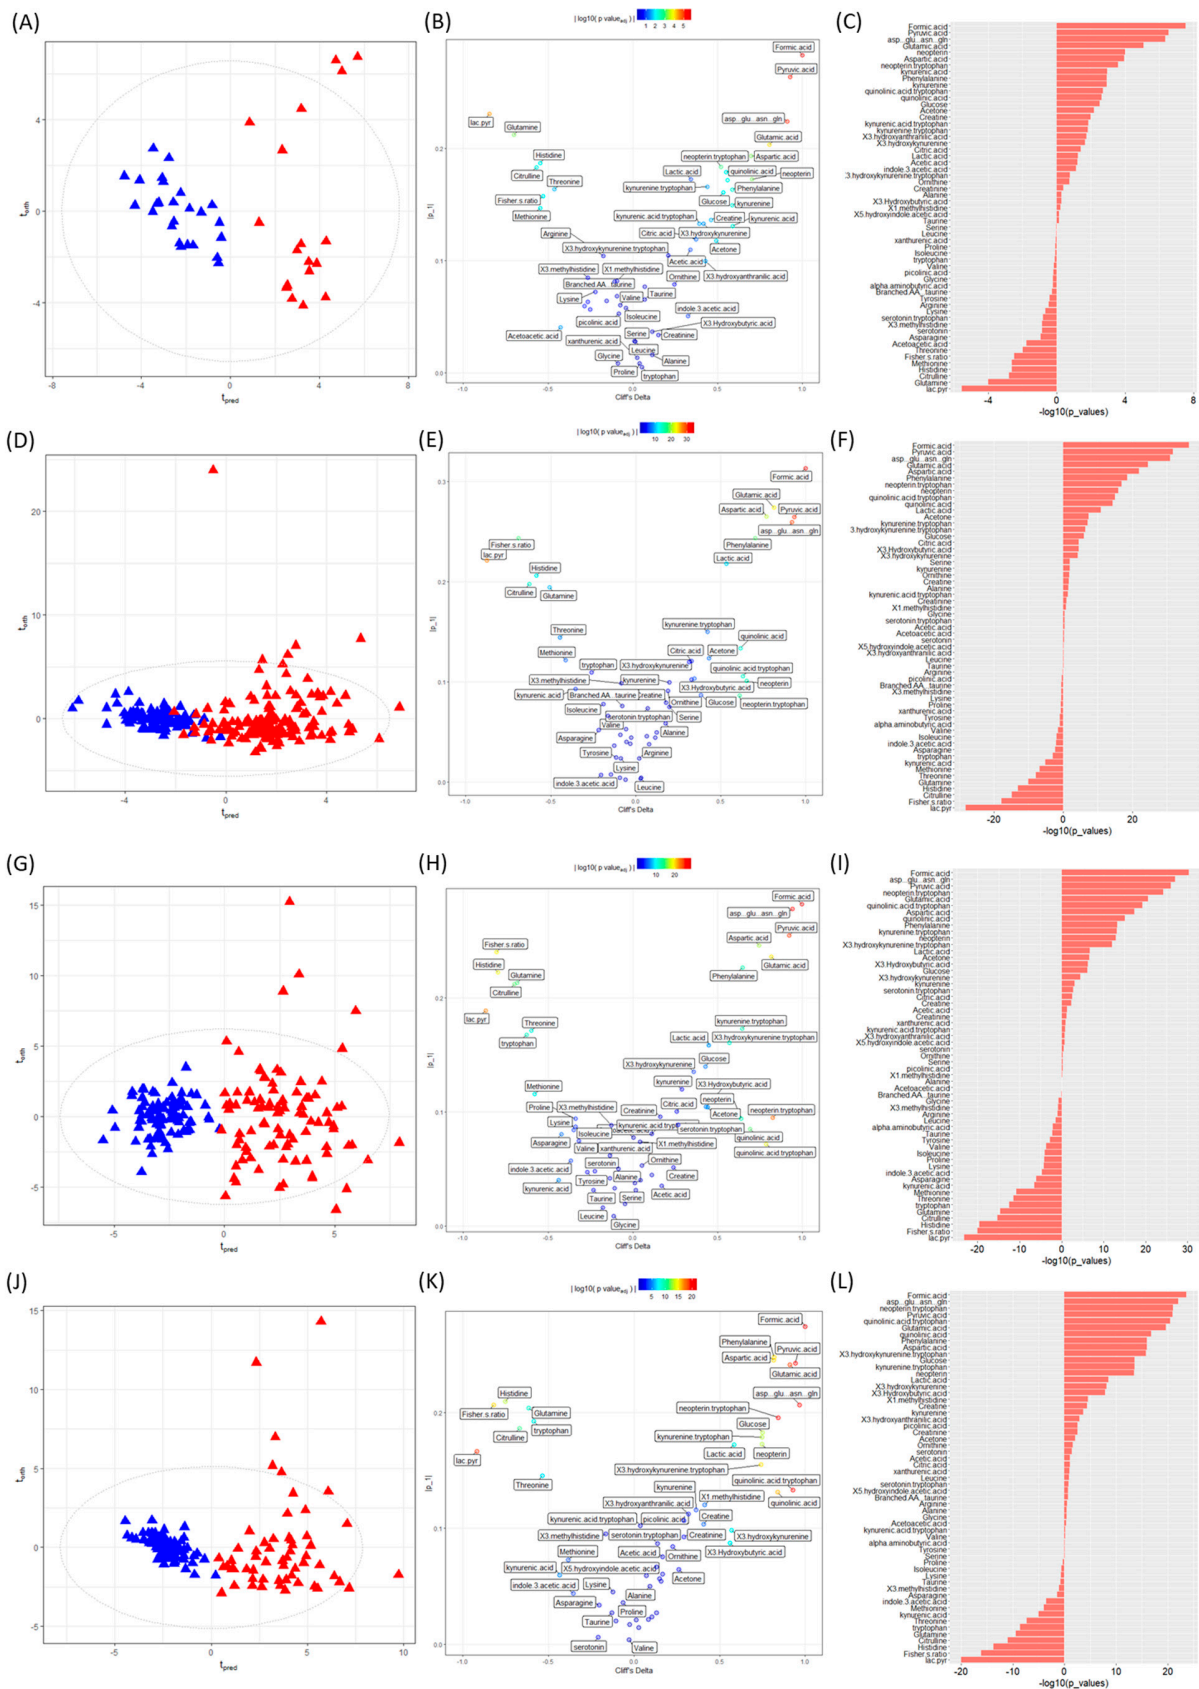

**Figure S11 - Orthogonal Partial Least Squared (O-PLS-DA), eruption plots and  $-\log 10$  (p-values) between controls and SARS-CoV-2 positive patients of each severity group for the low molecular weight metabolites.** (A) O-PLS-DA of controls (blue triangles) and SARS-CoV-2 group B severity patients (red triangles) ( $R^2X=0.22$ , AUROC=0.98). (B) Eruption plot of the controls vs group B severity group. (C)  $-\log 10$  (p-values) of the controls vs group B severity group. (D) O-PLS-DA of controls (blue triangles) and SARS-CoV-2 group C severity patients (red triangles) ( $R^2X=0.15$ , AUROC=0.99). (E) Eruption plot of the controls vs group C severity group. (F)  $-\log 10$  (p-values) of the controls vs group C severity group. (G) O-PLS-DA of controls (blue triangles) and SARS-CoV-2 group D severity patients (red triangles) ( $R^2X=0.19$ , AUROC=1.00). (H) Eruption plot of the controls vs group D severity group. (I)  $-\log 10$  (p-values) of the controls vs group D severity group. (J) O-PLS-DA of controls (blue triangles) and SARS-CoV-2 group E severity patients (red triangles) ( $R^2X=0.21$ , AUROC=1.00). (K) Eruption plot of the controls vs group E severity group. (L)  $-\log 10$  (p-values) of the controls vs group E severity group. Eruption plots are formed from the Cliff's delta (abscissa) and O-PLS-DA loadings (ordinate). Coloured by significance.

**Table S21 - OPLS loadings, Cliff's delta and adjusted p-values of the low molecular weight metabolites for the comparison of the controls and SARS-CoV-2 positive patients in severity class B.** Only metabolites with significant p-values are shown in the table.

| Metabolite                 | OPLS loadings | Cliff's delta | Adjusted p-value      |
|----------------------------|---------------|---------------|-----------------------|
| Formic acid                | 0.283         | 1.00          | $1.68 \times 10^{-6}$ |
| Pyruvic acid               | 0.264         | 0.93          | $8.01 \times 10^{-6}$ |
| Asp/Glu:Asn/Gln            | 0.224         | 0.91          | $8.50 \times 10^{-6}$ |
| Lactate/pyruvate           | 0.231         | -0.84         | $4.14 \times 10^{-5}$ |
| Glutamic acid              | 0.204         | 0.80          | $9.52 \times 10^{-5}$ |
| Neopterin                  | 0.172         | 0.70          | $7.91 \times 10^{-4}$ |
| Aspartic acid              | 0.193         | 0.70          | $7.91 \times 10^{-4}$ |
| Glutamine                  | 0.212         | -0.70         | $7.91 \times 10^{-4}$ |
| Neopterin/tryptophan       | 0.184         | 0.52          | $1.66 \times 10^{-3}$ |
| Kynurenic acid             | 0.131         | 0.59          | $5.49 \times 10^{-3}$ |
| Kynurenine                 | 0.149         | 0.47          | $1.66 \times 10^{-3}$ |
| Phenylalanine              | 0.163         | 0.59          | $5.49 \times 10^{-3}$ |
| Citrulline                 | 0.183         | -0.57         | $7.13 \times 10^{-3}$ |
| Quinolinic acid/tryptophan | 0.172         | 0.56          | $7.80 \times 10^{-3}$ |
| Quinolinic acid            | 0.176         | 0.55          | $8.25 \times 10^{-3}$ |
| Histidine                  | 0.187         | -0.55         | $8.25 \times 10^{-3}$ |
| Methionine                 | 0.147         | -0.55         | $8.25 \times 10^{-3}$ |
| Glucose                    | 0.161         | 0.53          | $9.92 \times 10^{-3}$ |
| Fisher's ratio             | 0.157         | -0.53         | $1.02 \times 10^{-2}$ |
| Acetone                    | 0.118         | 0.49          | $1.84 \times 10^{-2}$ |
| Creatine                   | 0.135         | 0.46          | $2.71 \times 10^{-2}$ |
| Threonine                  | 0.164         | -0.46         | $2.71 \times 10^{-2}$ |

|                           |       |       |                       |
|---------------------------|-------|-------|-----------------------|
| Kynurenic acid/tryptophan | 0.133 | 0.39  | 3.44x10 <sup>-2</sup> |
| Kynurenine/tryptophan     | 0.166 | 0.44  | 3.50x10 <sup>-2</sup> |
| Acetoacetic acid          | 0.040 | -0.43 | 3.88x10 <sup>-2</sup> |
| 3-hydroxyanthranilic acid | 0.100 | 0.43  | 3.88x10 <sup>-2</sup> |
| 3-hydroxykynurenine       | 0.133 | 0.42  | 4.49x10 <sup>-2</sup> |

**Table S22 - OPLS loadings, Cliff's delta and adjusted p-values of the low molecular weight metabolites for the comparison of the controls and SARS-CoV-2 positive patients in severity class C.** Only metabolites with significant p-values are shown in the table.

| Metabolite                     | OPLS loadings | Cliff's delta | Adjusted p-value       |
|--------------------------------|---------------|---------------|------------------------|
| Formic acid                    | 0.313         | 1.00          | 2.46x10 <sup>-35</sup> |
| Pyruvic acid                   | 0.265         | 0.93          | 4.95x10 <sup>-31</sup> |
| Asp/Glu:Asn/Gln                | 0.259         | 0.92          | 2.23x10 <sup>-30</sup> |
| Lactate/pyruvate               | 0.221         | -0.88         | 9.32x10 <sup>-28</sup> |
| Glutamic acid                  | 0.274         | 0.81          | 3.79x10 <sup>-24</sup> |
| Aspartic acid                  | 0.265         | 0.77          | 1.24x10 <sup>-21</sup> |
| Phenylalanine                  | 0.243         | 0.70          | 2.64x10 <sup>-18</sup> |
| Fisher's ratio                 | 0.243         | -0.69         | 1.08x10 <sup>-17</sup> |
| Neopterin/tryptophan           | 0.086         | 0.61          | 8.43x10 <sup>-17</sup> |
| Neopterin                      | 0.101         | 0.65          | 6.01x10 <sup>-16</sup> |
| Quinolinic acid/tryptophan     | 0.106         | 0.63          | 4.95x10 <sup>-15</sup> |
| Citrulline                     | 0.197         | -0.63         | 7.53x10 <sup>-15</sup> |
| Quinolinic acid                | 0.134         | 0.62          | 2.02x10 <sup>-14</sup> |
| Histidine                      | 0.206         | -0.59         | 3.70x10 <sup>-13</sup> |
| Lactic acid                    | 0.218         | 0.53          | 3.92x10 <sup>-11</sup> |
| Glutamine                      | 0.194         | -0.51         | 3.95x10 <sup>-10</sup> |
| Threonine                      | 0.144         | -0.45         | 4.12x10 <sup>-8</sup>  |
| Acetone                        | 0.123         | 0.43          | 1.35x10 <sup>-7</sup>  |
| Kynurenine/tryptophan          | 0.150         | 0.42          | 2.42x10 <sup>-7</sup>  |
| Methionine                     | 0.121         | -0.41         | 4.40x10 <sup>-7</sup>  |
| 3-hydroxykynurenine/tryptophan | 0.103         | 0.35          | 8.87x10 <sup>-7</sup>  |
| Glucose                        | 0.087         | 0.38          | 2.50x10 <sup>-6</sup>  |
| Kynurenic acid                 | 0.093         | -0.35         | 1.55x10 <sup>-5</sup>  |
| Citric acid                    | 0.120         | 0.33          | 6.50x10 <sup>-5</sup>  |
| 3-Hydroxybutyric acid          | 0.102         | 0.33          | 6.85x10 <sup>-5</sup>  |
| 3-Hydroxykynurenine            | 0.120         | 0.31          | 1.45x10 <sup>-4</sup>  |
| Tryptophan                     | 0.109         | -0.26         | 2.07x10 <sup>-3</sup>  |

|                      |       |       |                       |
|----------------------|-------|-------|-----------------------|
| Asparagine           | 0.052 | -0.22 | 1.05x10 <sup>-2</sup> |
| Indole-3-acetic acid | 0.007 | -0.21 | 1.71x10 <sup>-2</sup> |
| Serine               | 0.075 | 0.20  | 2.17x10 <sup>-2</sup> |
| Kynurenine           | 0.099 | 0.20  | 2.28x10 <sup>-2</sup> |
| Isoleucine           | 0.078 | -0.19 | 2.71x10 <sup>-2</sup> |
| Ornithine            | 0.091 | 0.19  | 2.89x10 <sup>-2</sup> |
| Creatine             | 0.079 | 0.18  | 4.08x10 <sup>-2</sup> |
| Alanine              | 0.058 | 0.18  | 4.22x10 <sup>-2</sup> |

**Table S23 - OPLS loadings, Cliff's delta and adjusted p-values of the low molecular weight metabolites for the comparison of the controls and SARS-CoV-2 positive patients in severity class D.** Only metabolites with significant p-values are shown in the table.

| Metabolite                     | OPLS loadings | Cliff's delta | Adjusted p-value       |
|--------------------------------|---------------|---------------|------------------------|
| Formic acid                    | 0.282         | 1.00          | 3.01x10 <sup>-29</sup> |
| Asp/Glu:Asn/Gln                | 0.278         | 0.94          | 2.41x10 <sup>-26</sup> |
| Pyruvic acid                   | 0.254         | 0.92          | 2.01x10 <sup>-25</sup> |
| Neopterin/tryptophan           | 0.095         | 0.82          | 8.77x10 <sup>-24</sup> |
| Lactate/pyruvate               | 0.189         | -0.87         | 7.12x10 <sup>-23</sup> |
| Glutamic acid                  | 0.236         | 0.82          | 2.67x10 <sup>-20</sup> |
| Fisher's ratio                 | 0.240         | -0.80         | 7.12x10 <sup>-20</sup> |
| Histidine                      | 0.222         | -0.80         | 1.72x10 <sup>-19</sup> |
| Quinolinic acid/tryptophan     | 0.072         | 0.79          | 3.62x10 <sup>-19</sup> |
| Aspartic acid                  | 0.246         | 0.74          | 2.95x10 <sup>-17</sup> |
| Citrulline                     | 0.212         | -0.70         | 2.68x10 <sup>-15</sup> |
| Quinolinic acid                | 0.085         | 0.69          | 4.10x10 <sup>-15</sup> |
| Glutamine                      | 0.213         | -0.68         | 9.50x10 <sup>-15</sup> |
| Phenylalanine                  | 0.227         | 0.65          | 2.36x10 <sup>-13</sup> |
| Kynurenine/tryptophan          | 0.173         | 0.64          | 2.82x10 <sup>-13</sup> |
| Neopterin                      | 0.094         | 0.64          | 4.01x10 <sup>-13</sup> |
| Tryptophan                     | 0.168         | -0.63         | 1.04x10 <sup>-12</sup> |
| 3-hydroxykynurenine/tryptophan | 0.161         | 0.57          | 3.21x10 <sup>-12</sup> |
| Threonine                      | 0.171         | -0.60         | 1.08x10 <sup>-11</sup> |
| Methionine                     | 0.116         | -0.58         | 4.99x10 <sup>-11</sup> |
| Lactic acid                    | 0.158         | 0.45          | 5.41x10 <sup>-7</sup>  |
| Acetone                        | 0.104         | 0.44          | 7.24x10 <sup>-7</sup>  |
| Kynurenic acid                 | 0.040         | -0.44         | 8.95x10 <sup>-7</sup>  |
| 3-hydroxybutyric acid          | 0.105         | 0.43          | 1.33x10 <sup>-6</sup>  |

|                         |       |       |                       |
|-------------------------|-------|-------|-----------------------|
| Glucose                 | 0.140 | 0.43  | 1.59x10 <sup>-6</sup> |
| Asparagine              | 0.080 | -0.42 | 2.19x10 <sup>-6</sup> |
| Indole-3-acetic acid    | 0.057 | -0.36 | 4.73x10 <sup>-5</sup> |
| 3-hydroxykynurenine     | 0.135 | 0.36  | 6.30x10 <sup>-5</sup> |
| Lysine                  | 0.084 | -0.35 | 1.03x10 <sup>-4</sup> |
| Proline                 | 0.094 | -0.34 | 1.54x10 <sup>-4</sup> |
| Isoleucine              | 0.087 | -0.34 | 1.60x10 <sup>-4</sup> |
| Valine                  | 0.075 | -0.32 | 4.01x10 <sup>-4</sup> |
| Kynurenine              | 0.120 | 0.29  | 1.40x10 <sup>-3</sup> |
| Tyrosine                | 0.047 | -0.27 | 3.02x10 <sup>-3</sup> |
| Serotonin/tryptophan    | 0.089 | 0.27  | 3.02x10 <sup>-3</sup> |
| Citric acid             | 0.100 | 0.26  | 4.09x10 <sup>-3</sup> |
| Creatine                | 0.052 | 0.24  | 8.30x10 <sup>-3</sup> |
| Taurine                 | 0.032 | -0.23 | 1.00x10 <sup>-2</sup> |
| Alpha-aminobutyric acid | 0.048 | -0.23 | 1.29x10 <sup>-2</sup> |

**Table S24 - OPLS loadings, Cliff's delta and adjusted p-values of the low molecular weight metabolites for the comparison of the controls and SARS-CoV-2 positive patients in severity class E.** Only metabolites with significant p-values are shown in the table.

| Metabolite                     | OPLS loadings | Cliff's delta | Adjusted p-value       |
|--------------------------------|---------------|---------------|------------------------|
| Formic acid                    | 0.274         | 1.00          | 1.38x10 <sup>-22</sup> |
| Asp/Glu:Asn/Gln                | 0.207         | 0.97          | 2.62x10 <sup>-21</sup> |
| Pyruvic acid                   | 0.243         | 0.94          | 1.43x10 <sup>-20</sup> |
| Neopterin/tryptophan           | 0.196         | 0.84          | 1.43x10 <sup>-20</sup> |
| Quinolinic acid/tryptophan     | 0.133         | 0.93          | 3.93x10 <sup>-20</sup> |
| Lactate/pyruvate               | 0.167         | -0.92         | 9.10x10 <sup>-20</sup> |
| Glutamic acid                  | 0.242         | 0.91          | 1.79x10 <sup>-19</sup> |
| Quinolinic acid                | 0.131         | 0.84          | 1.04x10 <sup>-16</sup> |
| Fisher's ratio                 | 0.207         | -0.82         | 4.71x10 <sup>-16</sup> |
| Phenylalanine                  | 0.248         | 0.82          | 5.29x10 <sup>-16</sup> |
| Aspartic acid                  | 0.246         | 0.82          | 5.32x10 <sup>-16</sup> |
| 3-hydroxykynurenine/tryptophan | 0.155         | 0.74          | 6.96x10 <sup>-16</sup> |
| Histidine                      | 0.210         | -0.75         | 8.42x10 <sup>-14</sup> |
| Glucose                        | 0.183         | 0.75          | 8.35x10 <sup>-12</sup> |
| Neopterin                      | 0.173         | 0.75          | 1.01x10 <sup>-13</sup> |
| Kynurenine/tryptophan          | 0.179         | 0.75          | 1.01x10 <sup>-13</sup> |
| Citrulline                     | 0.187         | -0.67         | 3.78x10 <sup>-11</sup> |

|                           |       |       |                       |
|---------------------------|-------|-------|-----------------------|
| Glutamine                 | 0.204 | -0.61 | $1.25 \times 10^{-9}$ |
| Lactic acid               | 0.172 | 0.58  | $7.98 \times 10^{-9}$ |
| Tryptophan                | 0.192 | -0.58 | $7.98 \times 10^{-9}$ |
| 3-hydroxykynurenine       | 0.098 | 0.57  | $1.82 \times 10^{-8}$ |
| 3-Hydroxybutyric acid     | 0.087 | 0.56  | $3.21 \times 10^{-8}$ |
| Threonine                 | 0.145 | -0.53 | $1.31 \times 10^{-7}$ |
| Kynurenic acid            | 0.060 | -0.44 | $2.81 \times 10^{-5}$ |
| 1-methylhistidine         | 0.120 | 0.41  | $5.82 \times 10^{-5}$ |
| Creatine                  | 0.104 | 0.41  | $8.15 \times 10^{-5}$ |
| Methionine                | 0.073 | -0.38 | $2.02 \times 10^{-4}$ |
| Kynurenine                | 0.116 | 0.36  | $4.63 \times 10^{-4}$ |
| Indole-3-acetic acid      | 0.044 | -0.35 | $6.06 \times 10^{-4}$ |
| 3-hydroxyanthranilic acid | 0.112 | 0.32  | $2.35 \times 10^{-3}$ |
| Creatinine                | 0.093 | 0.29  | $5.29 \times 10^{-3}$ |
| Picolinic acid            | 0.107 | 0.29  | $5.29 \times 10^{-3}$ |
| Acetone                   | 0.065 | 0.26  | $1.32 \times 10^{-2}$ |
| Ornithine                 | 0.084 | 0.23  | $3.55 \times 10^{-2}$ |

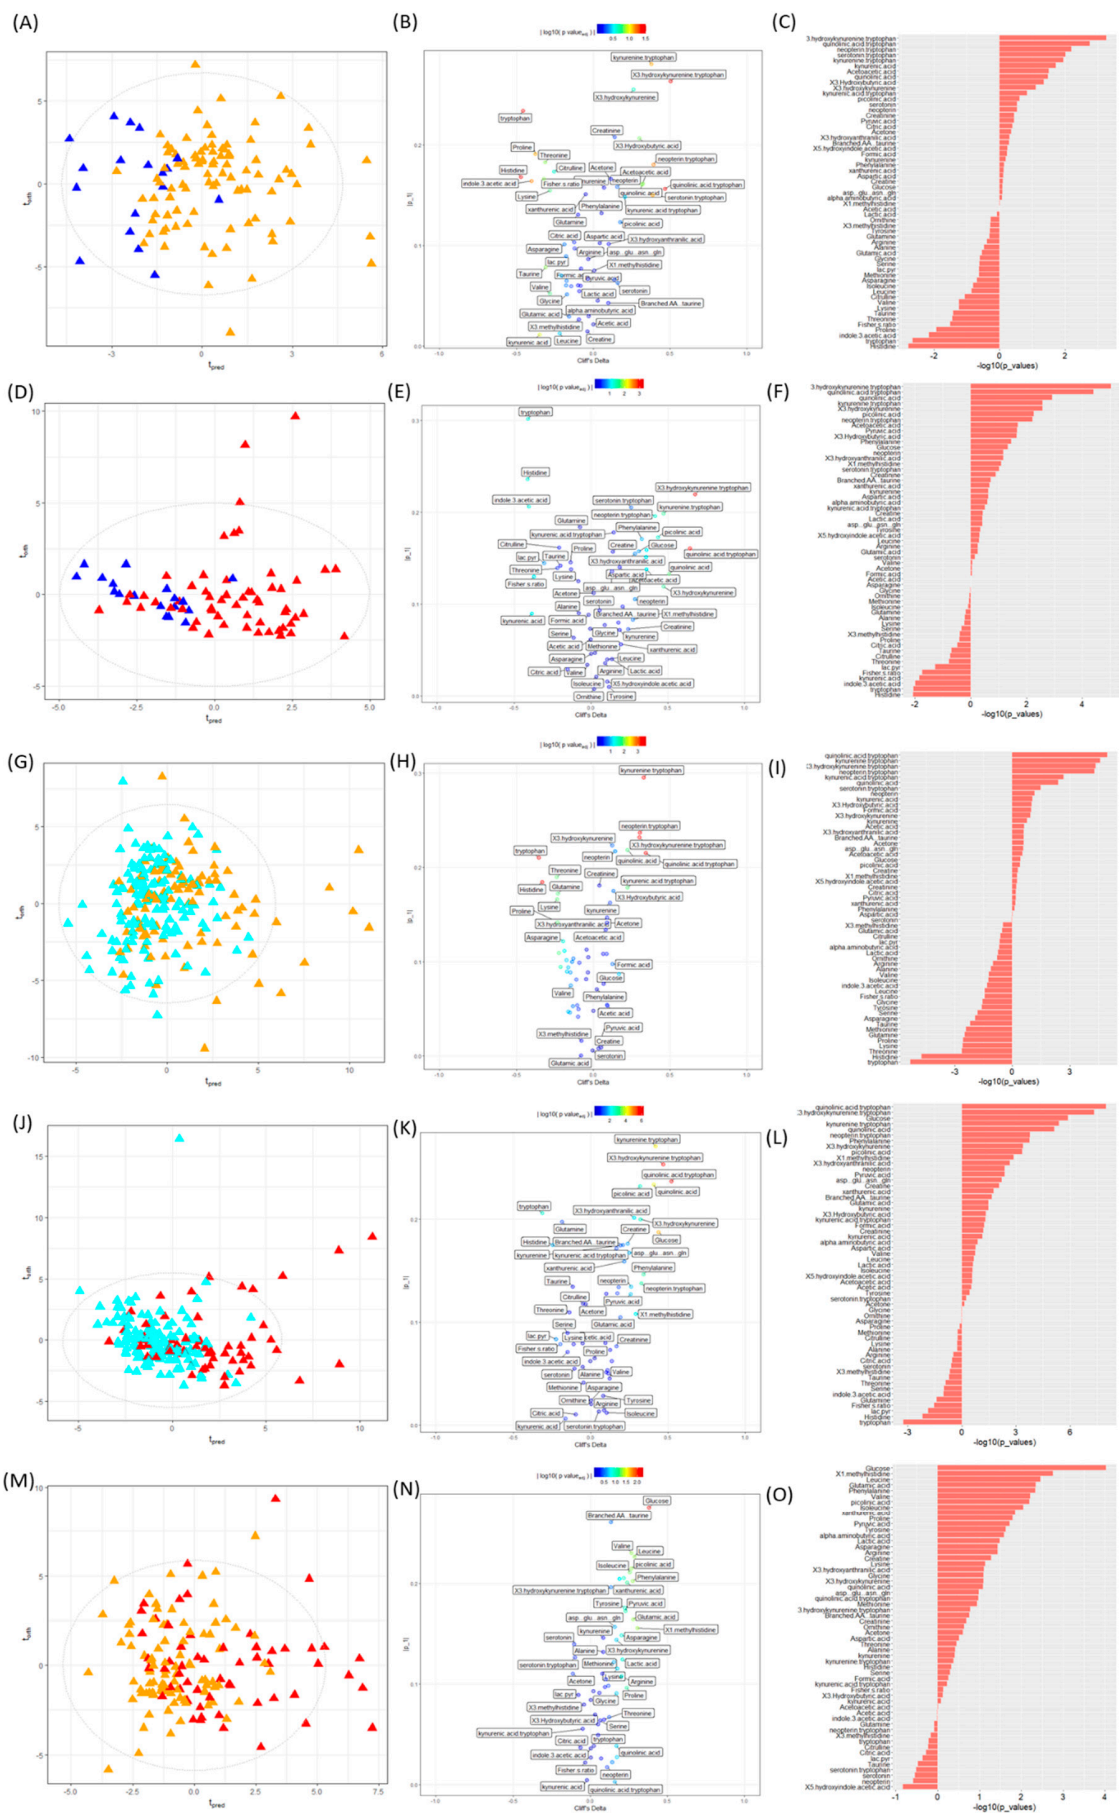

**Figure S12 - Orthogonal Partial Least Squared (O-PLS-DA), eruption plots and  $-\log 10$  (p-values) between different severity classes of SARS-CoV-2 positive patients for the low molecular weight metabolites.** (A) O-PLS-DA of SARS-CoV-2 severity group B (blue triangles) and SARS-CoV-2 severity group D (orange triangles) ( $R_2X=0.11$ , AUROC=0.76). (B) Eruption plot of group B vs group D. (C)  $-\log 10$  (p-values) of group B vs group D. (D) O-PLS-DA of SARS-CoV-2 severity group B (blue) and SARS-CoV-2 severity group E (red) ( $R_2X=0.09$ , AUROC=0.78). (E) Eruption plot of group B vs group E. (F)  $-\log 10$  (p-values) of group B vs group E. (G) O-PLS-DA of SARS-CoV-2 severity group C (cyan) and SARS-CoV-2 severity group D (orange) ( $R_2X=0.15$ , AUROC=0.65). (H) Eruption plot of group C vs group D. (I)  $-\log 10$  (p-values) of group C vs group D. (J) O-PLS-DA of SARS-CoV-2 severity group C (cyan) and SARS-CoV-2 severity group E (red) ( $R_2X=0.13$ , AUROC=0.74). (K) Eruption plot of group C vs group E. (L)  $-\log 10$  (p-values) of group C vs group E. (M) O-PLS-DA of SARS-CoV-2 severity group D (orange) and SARS-CoV-2 severity group E (red) ( $R_2X=0.12$ , AUROC=0.62). (N) Eruption plot of group D vs group E. (O)  $-\log 10$  (p-values) of group D vs group E. Comparison of severity group B vs severity group C produced no model (AUROC=0.58). Eruption plots are formed from the Cliff's delta (abscissa) and O-PLS-DA loadings (ordinate). Coloured by significance.

**Table S25 - OPLS loadings, Cliff's delta and adjusted p-values for the low molecular weight metabolites for the comparison of severity class B and D.** Only metabolites with significant p-values are shown in the table.

| Metabolite                     | OPLS loadings | Cliff's delta | Adjusted p-value      |
|--------------------------------|---------------|---------------|-----------------------|
| 3-hydroxykynurenine/tryptophan | 0.263         | 0.50          | $3.14 \times 10^{-2}$ |
| Tryptophan                     | 0.234         | -0.46         | $3.22 \times 10^{-2}$ |
| Histidine                      | 0.168         | -0.47         | $3.22 \times 10^{-2}$ |
| Quinolinic acid/tryptophan     | 0.156         | 0.47          | $3.22 \times 10^{-2}$ |

**Table S26 - OPLS loadings, Cliff's delta and adjusted p-values for the low molecular weight metabolites for the comparison of severity class B and E.** Only metabolites with significant p-values are shown in the table.

| Metabolite                     | OPLS loadings | Cliff's delta | Adjusted p-value      |
|--------------------------------|---------------|---------------|-----------------------|
| 3-hydroxykynurenine/tryptophan | 0.220         | 0.68          | $5.40 \times 10^{-4}$ |
| Quinolinic acid/tryptophan     | 0.161         | 0.65          | $1.14 \times 10^{-3}$ |
| Quinolinic acid                | 0.133         | 0.51          | $2.29 \times 10^{-2}$ |
| 3-hydroxykynurenine            | 0.119         | 0.47          | $3.05 \times 10^{-2}$ |
| Kynurenine/tryptophan          | 0.199         | 0.47          | $3.05 \times 10^{-2}$ |

**Table S27 - OPLS loadings, Cliff's delta and adjusted p-values for the low molecular weight metabolites for the comparison of severity class C and D.** Only metabolites with significant p-values are shown in the table.

| Metabolite | OPLS loadings | Cliff's delta | Adjusted p-value |
|------------|---------------|---------------|------------------|
|------------|---------------|---------------|------------------|

|                                |       |       |                       |
|--------------------------------|-------|-------|-----------------------|
| Tryptophan                     | 0.232 | -0.36 | 2.68x10 <sup>-4</sup> |
| Quinolinic acid/tryptophan     | 0.215 | 0.34  | 3.14x10 <sup>-4</sup> |
| Histidine                      | 0.185 | -0.33 | 3.46x10 <sup>-4</sup> |
| Kynurenine/tryptophan          | 0.296 | 0.33  | 3.73x10 <sup>-4</sup> |
| 3-hydroxykynurenine/tryptophan | 0.232 | 0.30  | 4.80x10 <sup>-4</sup> |
| Neopterin/tryptophan           | 0.237 | 0.30  | 4.80x10 <sup>-4</sup> |
| Lysine                         | 0.166 | -0.23 | 1.58x10 <sup>-2</sup> |
| Proline                        | 0.142 | -0.23 | 1.58x10 <sup>-2</sup> |
| Threonine                      | 0.190 | -0.24 | 1.58x10 <sup>-2</sup> |
| Kynurenic acid/tryptophan      | 0.179 | 0.22  | 1.58x10 <sup>-2</sup> |
| Glutamine                      | 0.173 | -0.23 | 1.68x10 <sup>-2</sup> |
| Quinolinic acid                | 0.219 | 0.22  | 1.78x10 <sup>-2</sup> |
| Methionine                     | 0.109 | -0.23 | 1.78x10 <sup>-2</sup> |
| Taurine                        | 0.094 | -0.21 | 2.60x10 <sup>-2</sup> |
| Asparagine                     | 0.122 | -0.20 | 4.35x10 <sup>-2</sup> |

**Table S28 - OPLS loadings, Cliff's delta and adjusted p-values for the low molecular weight metabolites for the comparison of severity class C and E.** Only metabolites with significant p-values are shown in the table.

| Metabolite                     | OPLS loadings | Cliff's delta | Adjusted p-value      |
|--------------------------------|---------------|---------------|-----------------------|
| Quinolinic acid/tryptophan     | 0.237         | 0.52          | 5.79x10 <sup>-7</sup> |
| 3-hydroxykynurenine/tryptophan | 0.253         | 0.47          | 1.34x10 <sup>-6</sup> |
| Glucose                        | 0.187         | 0.44          | 2.52x10 <sup>-5</sup> |
| Kynurenine/tryptophan          | 0.271         | 0.42          | 5.88x10 <sup>-5</sup> |
| Quinolinic acid                | 0.234         | 0.41          | 8.53x10 <sup>-5</sup> |
| Phenylalanine                  | 0.147         | 0.34          | 1.46x10 <sup>-3</sup> |
| Neopterin/tryptophan           | 0.138         | 0.33          | 1.46x10 <sup>-3</sup> |
| 3-hydroxykynurenine            | 0.200         | 0.32          | 2.77x10 <sup>-3</sup> |
| Picolinic acid                 | 0.232         | 0.32          | 2.77x10 <sup>-3</sup> |
| Tryptophan                     | 0.206         | -0.31         | 2.77x10 <sup>-3</sup> |
| 1-methylhistidine              | 0.108         | 0.29          | 6.86x10 <sup>-3</sup> |
| 3-hydroxyanthranilic acid      | 0.201         | 0.28          | 1.01x10 <sup>-2</sup> |
| Pyruvic acid                   | 0.127         | 0.26          | 1.75x10 <sup>-2</sup> |
| Neopterin                      | 0.135         | 0.26          | 1.75x10 <sup>-2</sup> |
| Asp/Glu:Asn/Gln                | 0.168         | 0.25          | 2.28x10 <sup>-2</sup> |
| Histidine                      | 0.175         | -0.25         | 2.33x10 <sup>-2</sup> |
| Creatine                       | 0.176         | 0.24          | 2.82x10 <sup>-2</sup> |

|                  |       |       |                       |
|------------------|-------|-------|-----------------------|
| Lactate/pyruvate | 0.084 | -0.22 | 4.32x10 <sup>-2</sup> |
|------------------|-------|-------|-----------------------|

**Table S29 - OPLS loadings, Cliff's delta and adjusted p-values for the low molecular weight metabolites for the comparison of severity class D and E.** Only metabolites with significant p-values are shown in the table.

| Metabolite | OPLS loadings | Cliff's delta | Adjusted p-value      |
|------------|---------------|---------------|-----------------------|
| Glucose    | 0.276         | 0.38          | 5.40x10 <sup>-3</sup> |

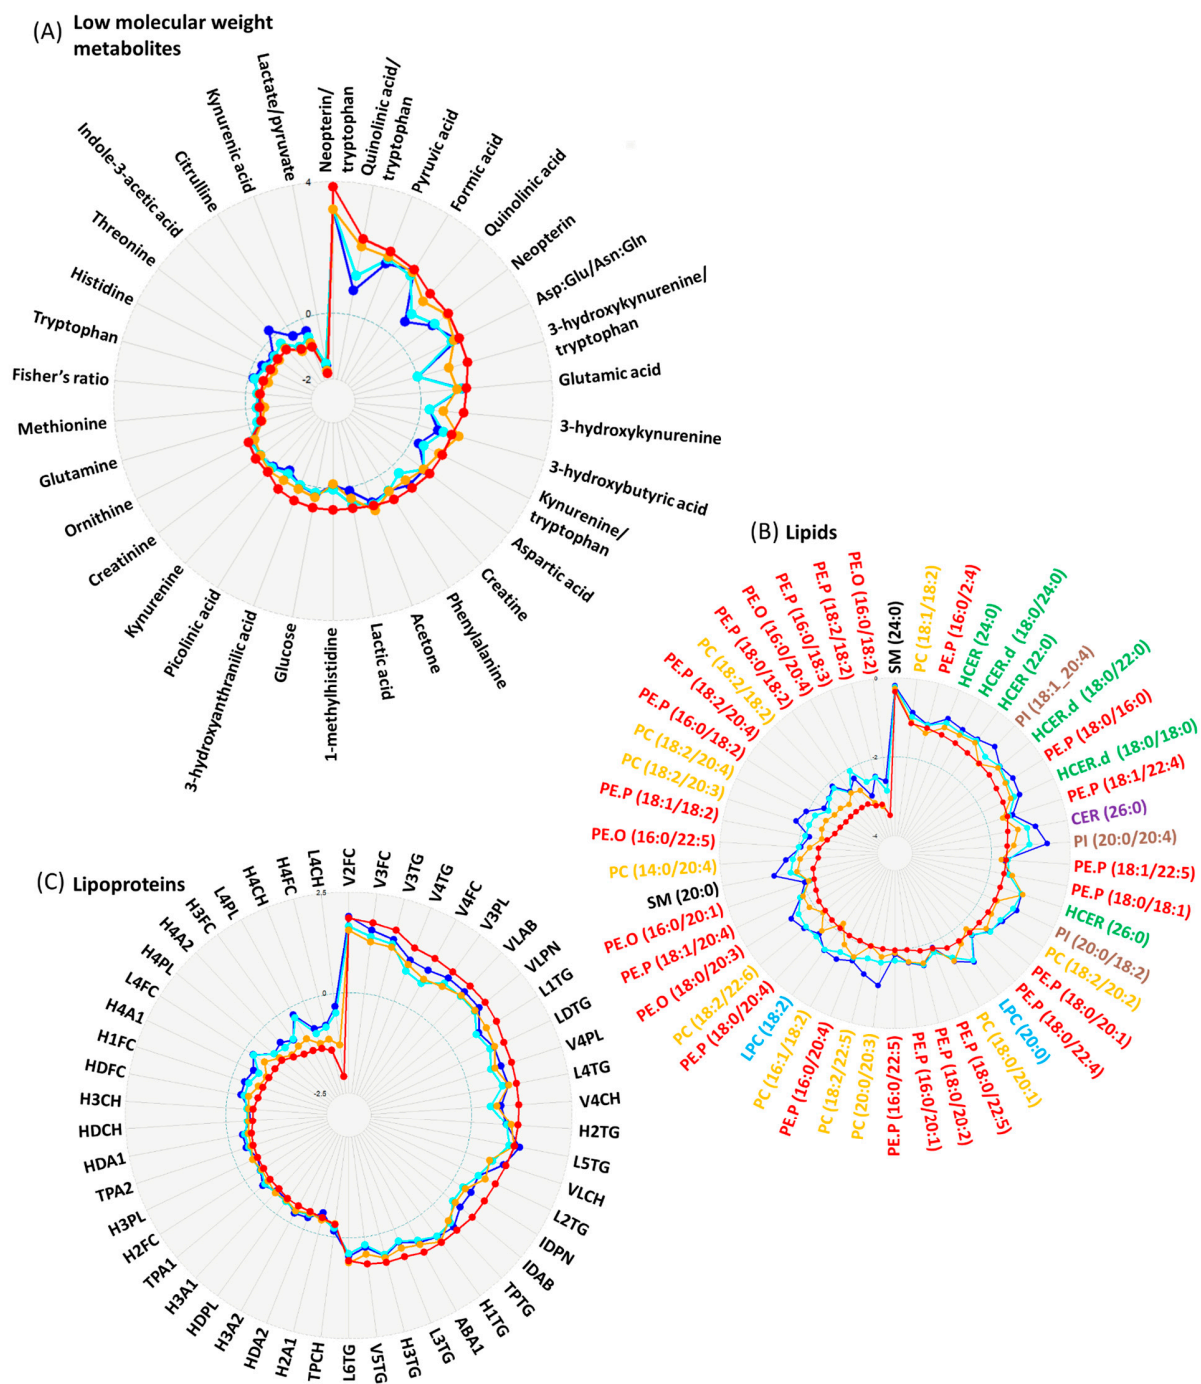

**Figure S13– Radar plots showing the log<sub>2</sub> fold change between controls and SARS-CoV-2 severity group E patients of the most significant ( $p < 0.05$ ) metabolites, lipids and lipoproteins ordered by log<sub>2</sub> fold change. All radar plots are coloured in relation to fold change of each severity class in comparison to the controls. Controls vs group B (blue), controls vs group C severity (cyan), controls vs group D severity (orange) and controls vs group E severity (red). (A) Radar plot of the metabolites with a significant p-value from the controls vs group E severity model for the low molecular weight metabolites. (B) Radar plot of the top 50 most significant lipids from the controls vs group E severity model. (C) Radar plot of the top 50 most significant lipoproteins from the controls vs group E severity model.**

**Table S30 - Demographics for the severity group E patients who survived and who did not.**

| <b>Patient</b> | <b>Sex</b> | <b>Age</b> | <b>Blood collection date</b> | <b>Date of death</b> | <b>Days between blood collection and death</b> |
|----------------|------------|------------|------------------------------|----------------------|------------------------------------------------|
| 1              | Male       | 73         | 01/04/2020                   | NA                   |                                                |
| 2              | Female     | 75         | 01/04/2020                   | NA                   |                                                |
| 3              | Male       | 65         | 01/04/2020                   | NA                   |                                                |
| 4              | Female     | 74         | 01/04/2020                   | NA                   |                                                |
| 5              | Female     | 68         | 01/04/2020                   | NA                   |                                                |
| 6              | Male       | 77         | 01/04/2020                   | NA                   |                                                |
| 7              | Male       | 77         | 01/04/2020                   | NA                   |                                                |
| 8              | Male       | 73         | 01/04/2020                   | NA                   |                                                |
| 9              | Male       | 73         | 01/04/2020                   | NA                   |                                                |
| 10             | Male       | 72         | 01/04/2020                   | NA                   |                                                |
| 11             | Female     | 72         | 01/04/2020                   | NA                   |                                                |
| 12             | Female     | 66         | 01/04/2020                   | NA                   |                                                |
| 13             | Male       | 76         | 01/04/2020                   | NA                   |                                                |
| 14             | Female     | 70         | 01/04/2020                   | 17/04/2020           | 16                                             |
| 15             | Male       | 77         | 01/04/2020                   | 14/04/2020           | 13                                             |
| 16             | Male       | 77         | 01/04/2020                   | 21/05/2020           | 50                                             |
| 17             | Male       | 73         | 01/04/2020                   | 28/04/2020           | 27                                             |
| 18             | Male       | 73         | 01/04/2020                   | 10/04/2020           | 9                                              |
| 19             | Female     | 79         | 01/04/2020                   | 02/05/2020           | 31                                             |
| 20             | Female     | 75         | 01/04/2020                   | 02/05/2020           | 31                                             |
| 21             | Male       | 70         | 01/04/2020                   | 01/06/2020           | 61                                             |
| 22             | Female     | 68         | 07/04/2020                   | 21/04/2020           | 14                                             |
| 23             | Female     | 80         | 09/04/2020                   | unknown              | -                                              |
| 24             | Male       | 66         | 09/04/2020                   | 17/04/2020           | 8                                              |
| 25             | Female     | 79         | 09/04/2020                   | 08/05/2020           | 29                                             |
| 26             | Male       | 79         | 09/04/2020                   | 03/05/2020           | 24                                             |

**Table S31 - OPLS loadings, Cliff's delta and adjusted p-values of the combined model (low molecular weight metabolites, lipoproteins and lipids) for the comparison group E severity patients comparing who survived and who died, samples were age matched. Only metabolites with significant p-values are shown in the table.**

| Metabolite           | OPLS loadings | Cliff's delta | Adjusted p-value      |
|----------------------|---------------|---------------|-----------------------|
| HCER (16:0)          | 0.057         | 0.92          | $9.15 \times 10^{-3}$ |
| HCER (20:0)          | 0.055         | 0.92          | $9.15 \times 10^{-3}$ |
| HCER (24:0)          | 0.063         | 0.91          | $9.15 \times 10^{-3}$ |
| HCER (24:1)          | 0.062         | 0.91          | $9.15 \times 10^{-3}$ |
| HCER (26:0)          | 0.061         | 0.95          | $9.15 \times 10^{-3}$ |
| HCER (26:1)          | 0.063         | 0.92          | $9.15 \times 10^{-3}$ |
| HCER.d (18:0/24:0)   | 0.063         | 0.91          | $9.15 \times 10^{-3}$ |
| HCER.d (18:0/24:1)   | 0.062         | 0.94          | $9.15 \times 10^{-3}$ |
| PE.O (18:0/18:1)     | 0.056         | -0.98         | $9.15 \times 10^{-3}$ |
| PE.P (16:0/18:0)     | 0.053         | -0.93         | $9.15 \times 10^{-3}$ |
| HCER (22:0)          | 0.063         | 0.89          | $9.41 \times 10^{-3}$ |
| HCER.d (18:0/22:0)   | 0.063         | 0.89          | $9.41 \times 10^{-3}$ |
| PE (16:0/18:1)       | 0.061         | -0.88         | $1.07 \times 10^{-2}$ |
| TAG (54:1)_FA (16:0) | 0.051         | -0.87         | $1.07 \times 10^{-2}$ |
| TAG (54:1)_FA (20:0) | 0.053         | -0.87         | $1.07 \times 10^{-2}$ |
| TAG (56:1)_FA (16:0) | 0.055         | -0.87         | $1.07 \times 10^{-2}$ |
| H3FC                 | 0.057         | 0.83          | $1.19 \times 10^{-2}$ |
| HCER (18:0)          | 0.052         | 0.83          | $1.19 \times 10^{-2}$ |
| PE (18:0/18:0)       | 0.059         | -0.85         | $1.19 \times 10^{-2}$ |
| PE (18:0/18:1)       | 0.058         | -0.83         | $1.19 \times 10^{-2}$ |
| PE (18:1/18:1)       | 0.059         | -0.82         | $1.19 \times 10^{-2}$ |
| PE (18:1/18:3)       | 0.044         | -0.82         | $1.19 \times 10^{-2}$ |
| PI (16:0/20:2)       | 0.040         | -0.82         | $1.19 \times 10^{-2}$ |
| SM (26:0)            | 0.060         | 0.86          | $1.19 \times 10^{-2}$ |
| TAG (50:1)_FA (16:0) | 0.053         | -0.82         | $1.19 \times 10^{-2}$ |
| TAG (50:2)_FA (16:0) | 0.048         | -0.82         | $1.19 \times 10^{-2}$ |
| TAG (52:2)_FA (18:1) | 0.055         | -0.82         | $1.19 \times 10^{-2}$ |
| TAG (54:2)_FA (20:0) | 0.036         | -0.82         | $1.19 \times 10^{-2}$ |
| TAG (56:1)_FA (18:1) | 0.053         | -0.82         | $1.19 \times 10^{-2}$ |
| TAG (56:2)_FA (16:0) | 0.054         | -0.83         | $1.19 \times 10^{-2}$ |
| TAG (56:2)_FA (20:0) | 0.053         | -0.83         | $1.19 \times 10^{-2}$ |
| TAG (58:2)_FA (18:1) | 0.038         | -0.83         | $1.19 \times 10^{-2}$ |

|                      |       |       |                       |
|----------------------|-------|-------|-----------------------|
| HCER.d (18:0/20:0)   | 0.050 | 0.81  | $1.25 \times 10^{-2}$ |
| PE (16:0/16:1)       | 0.050 | -0.81 | $1.25 \times 10^{-2}$ |
| PE (16:0/18:2)       | 0.056 | -0.81 | $1.25 \times 10^{-2}$ |
| PE (18:0/18:3)       | 0.048 | -0.81 | $1.25 \times 10^{-2}$ |
| PG (18:1/18:1)       | 0.047 | -0.81 | $1.25 \times 10^{-2}$ |
| HDCH                 | 0.050 | 0.80  | $1.30 \times 10^{-2}$ |
| VLPN                 | 0.050 | -0.79 | $1.30 \times 10^{-2}$ |
| VLAB                 | 0.050 | -0.79 | $1.30 \times 10^{-2}$ |
| DAG (16:0/16:0)      | 0.040 | -0.79 | $1.30 \times 10^{-2}$ |
| DAG (18:0/18:3)      | 0.038 | -0.79 | $1.30 \times 10^{-2}$ |
| HCER (14:0)          | 0.049 | 0.79  | $1.30 \times 10^{-2}$ |
| MAG (18:3)           | 0.040 | -0.79 | $1.30 \times 10^{-2}$ |
| PC (18:1/18:3)       | 0.048 | -0.79 | $1.30 \times 10^{-2}$ |
| PI (18:0/18:3)       | 0.025 | -0.80 | $1.30 \times 10^{-2}$ |
| TAG (50:1)_FA (18:1) | 0.056 | -0.79 | $1.30 \times 10^{-2}$ |
| TAG (51:2)_FA (16:0) | 0.037 | -0.80 | $1.30 \times 10^{-2}$ |
| TAG (52:1)_FA (18:1) | 0.060 | -0.79 | $1.30 \times 10^{-2}$ |
| TAG (55:1)_FA (16:0) | 0.048 | -0.80 | $1.30 \times 10^{-2}$ |
| TAG (55:1)_FA (18:1) | 0.048 | -0.80 | $1.30 \times 10^{-2}$ |
| TAG (56:3)_FA (16:0) | 0.043 | -0.80 | $1.30 \times 10^{-2}$ |
| MAG (18:1)           | 0.041 | -0.78 | $1.36 \times 10^{-2}$ |
| PC (16:0/18:3)       | 0.044 | -0.78 | $1.36 \times 10^{-2}$ |
| PC (18:0/20:4)       | 0.053 | 0.78  | $1.36 \times 10^{-2}$ |
| PE (16:0/18:3)       | 0.048 | -0.78 | $1.36 \times 10^{-2}$ |
| TAG (51:1)_FA (16:0) | 0.042 | -0.78 | $1.36 \times 10^{-2}$ |
| TAG (52:4)_FA (16:0) | 0.046 | -0.78 | $1.36 \times 10^{-2}$ |
| TAG (53:0)_FA (16:0) | 0.039 | -0.78 | $1.36 \times 10^{-2}$ |
| TAG (58:3)_FA (18:1) | 0.050 | -0.78 | $1.36 \times 10^{-2}$ |
| L6FC                 | 0.055 | 0.75  | $1.51 \times 10^{-2}$ |
| FFA (24:0)           | 0.041 | -0.76 | $1.51 \times 10^{-2}$ |
| TAG (50:5)_FA (18:1) | 0.035 | -0.76 | $1.54 \times 10^{-2}$ |
| TAG (52:0)_FA (20:0) | 0.042 | -0.76 | $1.54 \times 10^{-2}$ |
| LPE (18:3)           | 0.041 | -0.75 | $1.66 \times 10^{-2}$ |
| MAG (20:3)           | 0.040 | -0.75 | $1.66 \times 10^{-2}$ |
| PC (18:1/18:1)       | 0.040 | -0.75 | $1.66 \times 10^{-2}$ |
| SM (26:1)            | 0.043 | 0.75  | $1.66 \times 10^{-2}$ |
| TAG (52:3)_FA (18:3) | 0.031 | -0.75 | $1.66 \times 10^{-2}$ |

|                       |       |       |                       |
|-----------------------|-------|-------|-----------------------|
| TAG (54:0)_FA (16:0)  | 0.050 | -0.75 | 1.66x10 <sup>-2</sup> |
| TAG (54:4)_FA (18:1)  | 0.053 | -0.75 | 1.66x10 <sup>-2</sup> |
| DAG (16:0/18:0)       | 0.037 | -0.74 | 1.72x10 <sup>-2</sup> |
| DAG (16:0/18:1)       | 0.047 | -0.74 | 1.72x10 <sup>-2</sup> |
| LPE (18:1)            | 0.051 | -0.74 | 1.72x10 <sup>-2</sup> |
| PC (20:0/20:4)        | 0.052 | 0.74  | 1.72x10 <sup>-2</sup> |
| PE (18:0/20:1)        | 0.047 | -0.74 | 1.72x10 <sup>-2</sup> |
| TAG (51:1)_FA (18:1)  | 0.044 | -0.74 | 1.72x10 <sup>-2</sup> |
| TAG (52:1)_FA (16:0)  | 0.057 | -0.74 | 1.72x10 <sup>-2</sup> |
| TAG (52:2)_FA (20:0)  | 0.047 | -0.74 | 1.72x10 <sup>-2</sup> |
| TAG (53:1)_FA (16:0)  | 0.038 | -0.74 | 1.72x10 <sup>-2</sup> |
| TAG (54:2)_FA (16:0)  | 0.046 | -0.74 | 1.72x10 <sup>-2</sup> |
| TAG (54:5)_FA (18:1)  | 0.051 | -0.74 | 1.72x10 <sup>-2</sup> |
| V5TG                  | 0.048 | -0.73 | 1.79x10 <sup>-2</sup> |
| H1FC                  | 0.054 | 0.73  | 1.79x10 <sup>-2</sup> |
| DCER (26:1)           | 0.055 | 0.73  | 1.79x10 <sup>-2</sup> |
| MAG (18:0)            | 0.036 | -0.73 | 1.79x10 <sup>-2</sup> |
| PC (18:0/18:3)        | 0.035 | -0.73 | 1.79x10 <sup>-2</sup> |
| PS (20:0/18:1)        | 0.041 | -0.73 | 1.79x10 <sup>-2</sup> |
| TAG (51:1)_FA (17:0)  | 0.039 | -0.73 | 1.79x10 <sup>-2</sup> |
| TAG (52:4)_FA (18:3)  | 0.039 | -0.73 | 1.79x10 <sup>-2</sup> |
| TAG (54:4)_FA (18:3)  | 0.038 | -0.73 | 1.79x10 <sup>-2</sup> |
| TAG (54:5)_FA (18:0)  | 0.035 | -0.73 | 1.79x10 <sup>-2</sup> |
| TAG (54:6)_FA (18:1)  | 0.045 | -0.73 | 1.79x10 <sup>-2</sup> |
| TAG (57:10)_FA (22:6) | 0.034 | -0.73 | 1.79x10 <sup>-2</sup> |
| TPTG                  | 0.046 | -0.72 | 1.84x10 <sup>-2</sup> |
| VLCH                  | 0.043 | -0.72 | 1.84x10 <sup>-2</sup> |
| V4FC                  | 0.050 | -0.72 | 1.84x10 <sup>-2</sup> |
| CE (16:0)             | 0.051 | 0.72  | 1.84x10 <sup>-2</sup> |
| DAG (16:0/18:3)       | 0.036 | -0.72 | 1.84x10 <sup>-2</sup> |
| HCER.d (18:0/26:1)    | 0.048 | 0.72  | 1.84x10 <sup>-2</sup> |
| PE (18:1/20:1)        | 0.044 | -0.72 | 1.84x10 <sup>-2</sup> |
| PS (18:0/18:1)        | 0.057 | -0.72 | 1.84x10 <sup>-2</sup> |
| TAG (49:1)_FA (18:1)  | 0.032 | -0.72 | 1.84x10 <sup>-2</sup> |
| TAG (50:3)_FA (18:3)  | 0.035 | -0.72 | 1.84x10 <sup>-2</sup> |
| TAG (52:3)_FA (18:1)  | 0.052 | -0.72 | 1.84x10 <sup>-2</sup> |
| TAG (52:7)_FA (18:1)  | 0.034 | -0.72 | 1.84x10 <sup>-2</sup> |

|                      |       |       |                       |
|----------------------|-------|-------|-----------------------|
| TAG (54:2)_FA (18:1) | 0.054 | -0.72 | 1.84x10 <sup>-2</sup> |
| TAG (55:5)_FA (18:1) | 0.042 | -0.72 | 1.84x10 <sup>-2</sup> |
| TAG (57:2)_FA (18:1) | 0.051 | -0.72 | 1.84x10 <sup>-2</sup> |
| Branched AA/Taurine  | 0.036 | -0.70 | 1.94x10 <sup>-2</sup> |
| HDFC                 | 0.053 | 0.70  | 1.94x10 <sup>-2</sup> |
| DAG (18:1/20:1)      | 0.051 | -0.70 | 1.94x10 <sup>-2</sup> |
| SM (20:1)            | 0.048 | 0.70  | 1.94x10 <sup>-2</sup> |
| TAG (48:1)_FA (18:1) | 0.040 | -0.70 | 1.94x10 <sup>-2</sup> |
| TAG (50:4)_FA (16:0) | 0.031 | -0.70 | 1.94x10 <sup>-2</sup> |
| TAG (50:5)_FA (16:0) | 0.033 | -0.70 | 1.94x10 <sup>-2</sup> |
| TAG (52:6)_FA (16:0) | 0.033 | -0.70 | 1.94x10 <sup>-2</sup> |
| TAG (52:6)_FA (18:1) | 0.035 | -0.70 | 1.94x10 <sup>-2</sup> |
| TAG (53:1)_FA (18:1) | 0.040 | -0.70 | 1.94x10 <sup>-2</sup> |
| TAG (53:2)_FA (16:0) | 0.044 | -0.70 | 1.94x10 <sup>-2</sup> |
| TAG (54:2)_FA (20:1) | 0.048 | -0.70 | 1.94x10 <sup>-2</sup> |
| TAG (54:3)_FA (18:3) | 0.032 | -0.70 | 1.94x10 <sup>-2</sup> |
| TAG (54:7)_FA (18:1) | 0.038 | -0.70 | 1.94x10 <sup>-2</sup> |
| LDCH                 | 0.054 | 0.69  | 2.04x10 <sup>-2</sup> |
| V4TG                 | 0.043 | -0.69 | 2.04x10 <sup>-2</sup> |
| MAG (20:2)           | 0.029 | -0.69 | 2.04x10 <sup>-2</sup> |
| PE (16:0/22:5)       | 0.049 | -0.69 | 2.04x10 <sup>-2</sup> |
| PE (18:0/18:2)       | 0.050 | -0.69 | 2.04x10 <sup>-2</sup> |
| PE (18:1/18:2)       | 0.046 | -0.69 | 2.04x10 <sup>-2</sup> |
| PI (16:0/20:3)       | 0.035 | -0.69 | 2.04x10 <sup>-2</sup> |
| TAG (48:4)_FA (18:1) | 0.042 | -0.69 | 2.04x10 <sup>-2</sup> |
| TAG (49:0)_FA (16:0) | 0.031 | -0.69 | 2.04x10 <sup>-2</sup> |
| TAG (49:0)_FA (17:0) | 0.030 | -0.69 | 2.04x10 <sup>-2</sup> |
| TAG (49:1)_FA (16:0) | 0.033 | -0.69 | 2.04x10 <sup>-2</sup> |
| TAG (49:3)_FA (16:0) | 0.023 | -0.69 | 2.04x10 <sup>-2</sup> |
| TAG (51:2)_FA (17:0) | 0.026 | -0.69 | 2.04x10 <sup>-2</sup> |
| TAG (52:1)_FA (18:0) | 0.055 | -0.69 | 2.04x10 <sup>-2</sup> |
| TAG (52:3)_FA (18:2) | 0.040 | -0.69 | 2.04x10 <sup>-2</sup> |
| Taurine              | 0.033 | 0.68  | 2.18x10 <sup>-2</sup> |
| L6PN                 | 0.046 | 0.68  | 2.18x10 <sup>-2</sup> |
| V2FC                 | 0.041 | -0.68 | 2.18x10 <sup>-2</sup> |
| V4PL                 | 0.046 | -0.68 | 2.18x10 <sup>-2</sup> |
| L6AB                 | 0.046 | 0.68  | 2.18x10 <sup>-2</sup> |

|                      |       |       |                       |
|----------------------|-------|-------|-----------------------|
| MAG (22:6)           | 0.032 | -0.68 | 2.18x10 <sup>-2</sup> |
| PG (20:0/18:2)       | 0.052 | 0.68  | 2.18x10 <sup>-2</sup> |
| TAG (51:0)_FA (16:0) | 0.034 | -0.68 | 2.18x10 <sup>-2</sup> |
| TAG (52:1)_FA (20:0) | 0.033 | -0.68 | 2.18x10 <sup>-2</sup> |
| TAG (52:5)_FA (16:0) | 0.037 | -0.68 | 2.18x10 <sup>-2</sup> |
| TAG (53:2)_FA (17:0) | 0.046 | -0.68 | 2.18x10 <sup>-2</sup> |
| TAG (53:2)_FA (18:1) | 0.050 | -0.68 | 2.18x10 <sup>-2</sup> |
| TAG (54:5)_FA (18:3) | 0.039 | -0.68 | 2.18x10 <sup>-2</sup> |
| TAG (56:3)_FA (20:0) | 0.047 | -0.68 | 2.18x10 <sup>-2</sup> |
| H4FC                 | 0.052 | 0.67  | 2.22x10 <sup>-2</sup> |
| IDTG                 | 0.039 | -0.67 | 2.31x10 <sup>-2</sup> |
| V3FC                 | 0.040 | -0.67 | 2.31x10 <sup>-2</sup> |
| CE (22:4)            | 0.049 | 0.67  | 2.31x10 <sup>-2</sup> |
| DAG (16:0/20:5)      | 0.024 | -0.67 | 2.31x10 <sup>-2</sup> |
| LPE (18:2)           | 0.038 | -0.67 | 2.31x10 <sup>-2</sup> |
| MAG (16:0)           | 0.037 | -0.67 | 2.31x10 <sup>-2</sup> |
| MAG (18:2)           | 0.040 | -0.67 | 2.31x10 <sup>-2</sup> |
| MAG (22:4)           | 0.037 | -0.67 | 2.31x10 <sup>-2</sup> |
| PI (16:0/20:4)       | 0.036 | -0.67 | 2.31x10 <sup>-2</sup> |
| TAG (48:4)_FA (16:0) | 0.029 | -0.67 | 2.31x10 <sup>-2</sup> |
| TAG (51:1)_FA (18:0) | 0.029 | -0.67 | 2.31x10 <sup>-2</sup> |
| TAG (51:2)_FA (16:1) | 0.032 | -0.67 | 2.31x10 <sup>-2</sup> |
| TAG (51:4)_FA (18:3) | 0.025 | -0.67 | 2.31x10 <sup>-2</sup> |
| TAG (53:4)_FA (16:0) | 0.029 | -0.67 | 2.31x10 <sup>-2</sup> |
| TAG (54:2)_FA (18:0) | 0.055 | -0.67 | 2.31x10 <sup>-2</sup> |
| L6CH                 | 0.048 | 0.66  | 2.46x10 <sup>-2</sup> |
| H1CH                 | 0.040 | 0.66  | 2.46x10 <sup>-2</sup> |
| DAG (18:0/18:1)      | 0.051 | -0.66 | 2.46x10 <sup>-2</sup> |
| MAG (20:4)           | 0.036 | -0.66 | 2.46x10 <sup>-2</sup> |
| PC (16:1/18:1)       | 0.037 | -0.66 | 2.46x10 <sup>-2</sup> |
| PE (16:0/20:1)       | 0.050 | -0.66 | 2.46x10 <sup>-2</sup> |
| PE (18:0/16:0)       | 0.045 | -0.66 | 2.46x10 <sup>-2</sup> |
| PE (18:1/20:3)       | 0.046 | -0.66 | 2.46x10 <sup>-2</sup> |
| PG (20:0/20:1)       | 0.047 | 0.66  | 2.46x10 <sup>-2</sup> |
| TAG (48:1)_FA (16:0) | 0.039 | -0.66 | 2.46x10 <sup>-2</sup> |
| TAG (49:1)_FA (16:1) | 0.025 | -0.66 | 2.46x10 <sup>-2</sup> |
| TAG (49:2)_FA (18:1) | 0.027 | -0.66 | 2.46x10 <sup>-2</sup> |

|                             |       |       |                       |
|-----------------------------|-------|-------|-----------------------|
| TAG (50:2)_FA (18:1)        | 0.047 | -0.66 | 2.46x10 <sup>-2</sup> |
| TAG (51:2)_FA (18:1)        | 0.043 | -0.66 | 2.46x10 <sup>-2</sup> |
| TAG (52:5)_FA (22:5)        | 0.029 | -0.66 | 2.46x10 <sup>-2</sup> |
| TAG (53:1)_FA (17:0)        | 0.036 | -0.66 | 2.46x10 <sup>-2</sup> |
| TAG (54:4)_FA (16:0)        | 0.037 | -0.66 | 2.46x10 <sup>-2</sup> |
| TAG (56:3)_FA (18:2)        | 0.040 | -0.66 | 2.46x10 <sup>-2</sup> |
| $\alpha$ -aminobutyric acid | 0.029 | -0.64 | 2.46x10 <sup>-2</sup> |
| Isoleucine                  | 0.023 | -0.64 | 2.60x10 <sup>-2</sup> |
| DAG (18:1/20:5)             | 0.026 | -0.64 | 2.60x10 <sup>-2</sup> |
| MAG (22:5)                  | 0.037 | -0.64 | 2.60x10 <sup>-2</sup> |
| PC (16:0/18:1)              | 0.037 | -0.64 | 2.60x10 <sup>-2</sup> |
| PI (18:0/20:5)              | 0.023 | -0.64 | 2.60x10 <sup>-2</sup> |
| PI (18:1/18:1)              | 0.031 | -0.64 | 2.60x10 <sup>-2</sup> |
| TAG (46:3)_FA (16:0)        | 0.030 | -0.64 | 2.60x10 <sup>-2</sup> |
| TAG (48:1)_FA (14:0)        | 0.036 | -0.64 | 2.60x10 <sup>-2</sup> |
| TAG (48:2)_FA (16:0)        | 0.022 | -0.64 | 2.60x10 <sup>-2</sup> |
| TAG (49:2)_FA (16:0)        | 0.022 | -0.64 | 2.60x10 <sup>-2</sup> |
| TAG (50:0)_FA (18:0)        | 0.035 | -0.64 | 2.60x10 <sup>-2</sup> |
| TAG (50:2)_FA (16:1)        | 0.043 | -0.64 | 2.60x10 <sup>-2</sup> |
| TAG (52:0)_FA (16:0)        | 0.045 | -0.64 | 2.60x10 <sup>-2</sup> |
| TAG (52:1)_FA (20:1)        | 0.039 | -0.64 | 2.60x10 <sup>-2</sup> |
| TAG (52:2)_FA (20:2)        | 0.034 | -0.64 | 2.60x10 <sup>-2</sup> |
| TAG (52:3)_FA (20:2)        | 0.025 | -0.64 | 2.60x10 <sup>-2</sup> |
| TAG (53:1)_FA (18:0)        | 0.036 | -0.64 | 2.60x10 <sup>-2</sup> |
| TAG (54:1)_FA (18:0)        | 0.053 | -0.64 | 2.60x10 <sup>-2</sup> |
| TAG (54:1)_FA (18:1)        | 0.053 | -0.64 | 2.60x10 <sup>-2</sup> |
| TAG (56:7)_FA (20:5)        | 0.032 | -0.64 | 2.60x10 <sup>-2</sup> |
| VLFC                        | 0.038 | -0.63 | 2.70x10 <sup>-2</sup> |
| V5FC                        | 0.042 | -0.63 | 2.70x10 <sup>-2</sup> |
| H2TG                        | 0.049 | -0.63 | 2.70x10 <sup>-2</sup> |
| CE (20:3)                   | 0.039 | 0.63  | 2.70x10 <sup>-2</sup> |
| DAG (14:0/18:3)             | 0.029 | -0.63 | 2.70x10 <sup>-2</sup> |
| DAG (16:0/20:4)             | 0.033 | -0.63 | 2.70x10 <sup>-2</sup> |
| DAG (18:0/18:2)             | 0.034 | -0.63 | 2.70x10 <sup>-2</sup> |
| DAG (18:1/18:1)             | 0.043 | -0.63 | 2.70x10 <sup>-2</sup> |
| PE (18:0/20:2)              | 0.047 | -0.63 | 2.70x10 <sup>-2</sup> |
| PE.P (16:0/22:6)            | 0.034 | 0.63  | 2.70x10 <sup>-2</sup> |

|                      |       |       |                       |
|----------------------|-------|-------|-----------------------|
| PE.P (18:0/20:4)     | 0.040 | 0.63  | 2.70x10 <sup>-2</sup> |
| PI (16:0/18:1)       | 0.041 | -0.63 | 2.70x10 <sup>-2</sup> |
| TAG (47:1)_FA (16:0) | 0.025 | -0.63 | 2.70x10 <sup>-2</sup> |
| TAG (49:0)_FA (18:0) | 0.024 | -0.63 | 2.70x10 <sup>-2</sup> |
| TAG (49:3)_FA (18:3) | 0.021 | -0.63 | 2.70x10 <sup>-2</sup> |
| TAG (50:0)_FA (16:0) | 0.041 | -0.63 | 2.70x10 <sup>-2</sup> |
| TAG (50:3)_FA (16:0) | 0.029 | -0.63 | 2.70x10 <sup>-2</sup> |
| TAG (51:3)_FA (18:3) | 0.023 | -0.63 | 2.70x10 <sup>-2</sup> |
| TAG (52:7)_FA (16:0) | 0.030 | -0.63 | 2.70x10 <sup>-2</sup> |
| TAG (54:3)_FA (16:0) | 0.036 | -0.63 | 2.70x10 <sup>-2</sup> |
| TAG (54:3)_FA (18:1) | 0.051 | -0.63 | 2.70x10 <sup>-2</sup> |
| TAG (54:3)_FA (20:2) | 0.038 | -0.63 | 2.70x10 <sup>-2</sup> |
| TAG (54:8)_FA (18:2) | 0.031 | -0.63 | 2.70x10 <sup>-2</sup> |
| TAG (56:2)_FA (18:0) | 0.044 | -0.63 | 2.70x10 <sup>-2</sup> |
| TAG (56:4)_FA (16:0) | 0.036 | -0.63 | 2.70x10 <sup>-2</sup> |
| TAG (56:7)_FA (18:1) | 0.041 | -0.63 | 2.70x10 <sup>-2</sup> |
| Tyrosine             | 0.032 | -0.62 | 2.90x10 <sup>-2</sup> |
| V5CH                 | 0.042 | -0.62 | 2.90x10 <sup>-2</sup> |
| L3FC                 | 0.047 | 0.62  | 2.90x10 <sup>-2</sup> |
| CE (20:0)            | 0.046 | 0.62  | 2.90x10 <sup>-2</sup> |
| FFA (20:0)           | 0.038 | -0.62 | 2.90x10 <sup>-2</sup> |
| LPE (20:1)           | 0.046 | -0.62 | 2.90x10 <sup>-2</sup> |
| PC (14:0/18:1)       | 0.038 | -0.62 | 2.90x10 <sup>-2</sup> |
| PC (18:1/20:2)       | 0.037 | -0.62 | 2.90x10 <sup>-2</sup> |
| PC (18:2/18:3)       | 0.042 | -0.62 | 2.90x10 <sup>-2</sup> |
| TAG (45:1)_FA (16:0) | 0.025 | -0.62 | 2.90x10 <sup>-2</sup> |
| TAG (48:1)_FA (16:1) | 0.035 | -0.62 | 2.90x10 <sup>-2</sup> |
| TAG (52:2)_FA (14:0) | 0.028 | -0.62 | 2.90x10 <sup>-2</sup> |
| TAG (52:3)_FA (20:3) | 0.035 | -0.62 | 2.90x10 <sup>-2</sup> |
| TAG (52:5)_FA (20:5) | 0.030 | -0.62 | 2.90x10 <sup>-2</sup> |
| TAG (53:4)_FA (18:3) | 0.026 | -0.62 | 2.90x10 <sup>-2</sup> |
| TAG (54:1)_FA (20:1) | 0.041 | -0.62 | 2.90x10 <sup>-2</sup> |
| TAG (54:2)_FA (20:2) | 0.032 | -0.62 | 2.90x10 <sup>-2</sup> |
| TAG (54:6)_FA (20:5) | 0.031 | -0.62 | 2.90x10 <sup>-2</sup> |
| TAG (55:2)_FA (18:2) | 0.028 | -0.62 | 2.90x10 <sup>-2</sup> |
| TAG (56:5)_FA (18:1) | 0.044 | -0.62 | 2.90x10 <sup>-2</sup> |
| LDFC                 | 0.051 | 0.61  | 3.08x10 <sup>-2</sup> |

|                      |       |       |                       |
|----------------------|-------|-------|-----------------------|
| HDA1                 | 0.045 | 0.61  | $3.08 \times 10^{-2}$ |
| V5PL                 | 0.038 | -0.61 | $3.08 \times 10^{-2}$ |
| L6PL                 | 0.047 | 0.61  | $3.08 \times 10^{-2}$ |
| H4A1                 | 0.045 | 0.61  | $3.08 \times 10^{-2}$ |
| DAG (16:1/18:0)      | 0.035 | -0.61 | $3.08 \times 10^{-2}$ |
| DAG (18:2/18:3)      | 0.031 | -0.61 | $3.08 \times 10^{-2}$ |
| PE (18:1/22:6)       | 0.047 | -0.61 | $3.08 \times 10^{-2}$ |
| PE.P (16:0/16:1)     | 0.034 | -0.61 | $3.08 \times 10^{-2}$ |
| PE.P (16:0/20:4)     | 0.042 | 0.61  | $3.08 \times 10^{-2}$ |
| PI (16:0/22:4)       | 0.019 | -0.61 | $3.08 \times 10^{-2}$ |
| TAG (44:2)_FA (16:0) | 0.020 | -0.61 | $3.08 \times 10^{-2}$ |
| TAG (44:2)_FA (18:1) | 0.025 | -0.61 | $3.08 \times 10^{-2}$ |
| TAG (46:3)_FA (18:1) | 0.024 | -0.61 | $3.08 \times 10^{-2}$ |
| TAG (47:0)_FA (16:0) | 0.025 | -0.61 | $3.08 \times 10^{-2}$ |
| TAG (52:3)_FA (14:0) | 0.024 | -0.61 | $3.08 \times 10^{-2}$ |
| TAG (54:4)_FA (20:3) | 0.036 | -0.61 | $3.08 \times 10^{-2}$ |
| TAG (54:5)_FA (16:0) | 0.041 | -0.61 | $3.08 \times 10^{-2}$ |
| TAG (54:5)_FA (20:5) | 0.029 | -0.61 | $3.08 \times 10^{-2}$ |
| TAG (54:5)_FA (22:5) | 0.033 | -0.61 | $3.08 \times 10^{-2}$ |
| TAG (54:8)_FA (18:3) | 0.035 | -0.61 | $3.08 \times 10^{-2}$ |
| TAG (56:2)_FA (20:1) | 0.047 | -0.61 | $3.08 \times 10^{-2}$ |
| TAG (56:3)_FA (18:1) | 0.049 | -0.61 | $3.08 \times 10^{-2}$ |
| TAG (56:5)_FA (16:0) | 0.033 | -0.61 | $3.08 \times 10^{-2}$ |
| TPA1                 | 0.047 | 0.60  | $3.30 \times 10^{-2}$ |
| LDPL                 | 0.049 | 0.60  | $3.30 \times 10^{-2}$ |
| DAG (16:0/22:5)      | 0.029 | -0.60 | $3.30 \times 10^{-2}$ |
| FFA (20:5)           | 0.024 | -0.60 | $3.30 \times 10^{-2}$ |
| HCER.d (18:0/26:0)   | 0.036 | 0.60  | $3.30 \times 10^{-2}$ |
| PC (16:0/16:1)       | 0.035 | -0.60 | $3.30 \times 10^{-2}$ |
| PE (16:0/20:3)       | 0.045 | -0.60 | $3.30 \times 10^{-2}$ |
| PE (16:0/20:4)       | 0.048 | -0.60 | $3.30 \times 10^{-2}$ |
| PE (18:0/22:5)       | 0.046 | -0.60 | $3.30 \times 10^{-2}$ |
| PG (18:2/18:2)       | 0.028 | -0.60 | $3.30 \times 10^{-2}$ |
| PI (16:0/22:5)       | 0.041 | -0.60 | $3.30 \times 10^{-2}$ |
| PI (18:1/18:2)       | 0.030 | -0.60 | $3.30 \times 10^{-2}$ |
| PS (20:0/18:3)       | 0.034 | -0.60 | $3.30 \times 10^{-2}$ |
| SM (18:0)            | 0.032 | 0.60  | $3.30 \times 10^{-2}$ |

|                      |       |       |                       |
|----------------------|-------|-------|-----------------------|
| SM (22:1)            | 0.046 | 0.60  | $3.30 \times 10^{-2}$ |
| TAG (48:0)_FA (16:0) | 0.036 | -0.60 | $3.30 \times 10^{-2}$ |
| TAG (48:2)_FA (14:0) | 0.021 | -0.60 | $3.30 \times 10^{-2}$ |
| TAG (48:3)_FA (18:3) | 0.025 | -0.60 | $3.30 \times 10^{-2}$ |
| TAG (51:0)_FA (18:0) | 0.031 | -0.60 | $3.30 \times 10^{-2}$ |
| TAG (51:3)_FA (17:0) | 0.020 | -0.60 | $3.30 \times 10^{-2}$ |
| TAG (54:3)_FA (20:3) | 0.037 | -0.60 | $3.30 \times 10^{-2}$ |
| TAG (56:3)_FA (18:0) | 0.039 | -0.60 | $3.30 \times 10^{-2}$ |
| TAG (56:3)_FA (20:2) | 0.043 | -0.60 | $3.30 \times 10^{-2}$ |
| TAG (56:4)_FA (22:4) | 0.030 | -0.60 | $3.30 \times 10^{-2}$ |
| CE (22:6)            | 0.048 | 0.59  | $3.59 \times 10^{-2}$ |
| DAG (18:1/20:2)      | 0.039 | -0.59 | $3.59 \times 10^{-2}$ |
| DAG (18:2/20:5)      | 0.024 | -0.59 | $3.59 \times 10^{-2}$ |
| PE.O (18:0/18:2)     | 0.038 | -0.59 | $3.59 \times 10^{-2}$ |
| PE.P (18:1/20:4)     | 0.043 | 0.59  | $3.59 \times 10^{-2}$ |
| TAG (42:1)_FA (16:0) | 0.021 | -0.59 | $3.59 \times 10^{-2}$ |
| TAG (47:1)_FA (16:1) | 0.023 | -0.59 | $3.59 \times 10^{-2}$ |
| TAG (48:3)_FA (16:0) | 0.018 | -0.59 | $3.59 \times 10^{-2}$ |
| TAG (49:1)_FA (17:0) | 0.026 | -0.59 | $3.59 \times 10^{-2}$ |
| TAG (49:2)_FA (14:0) | 0.023 | -0.59 | $3.59 \times 10^{-2}$ |
| TAG (49:2)_FA (16:1) | 0.023 | -0.59 | $3.59 \times 10^{-2}$ |
| TAG (50:1)_FA (16:1) | 0.031 | -0.59 | $3.59 \times 10^{-2}$ |
| TAG (50:4)_FA (18:1) | 0.032 | -0.59 | $3.59 \times 10^{-2}$ |
| TAG (52:1)_FA (16:1) | 0.034 | -0.59 | $3.59 \times 10^{-2}$ |
| TAG (52:5)_FA (18:1) | 0.035 | -0.59 | $3.59 \times 10^{-2}$ |
| TAG (54:3)_FA (18:0) | 0.047 | -0.59 | $3.59 \times 10^{-2}$ |
| TAG (54:5)_FA (20:4) | 0.038 | -0.59 | $3.59 \times 10^{-2}$ |
| TAG (57:3)_FA (18:2) | 0.034 | -0.59 | $3.59 \times 10^{-2}$ |
| TAG (58:7)_FA (18:1) | 0.038 | -0.59 | $3.59 \times 10^{-2}$ |
| H3TG                 | 0.047 | -0.58 | $3.83 \times 10^{-2}$ |
| IDPN                 | 0.044 | -0.57 | $3.90 \times 10^{-2}$ |
| IDAB                 | 0.044 | -0.57 | $3.90 \times 10^{-2}$ |
| V3PL                 | 0.036 | -0.57 | $3.90 \times 10^{-2}$ |
| L1TG                 | 0.044 | -0.57 | $3.90 \times 10^{-2}$ |
| DAG (18:1/20:4)      | 0.031 | -0.57 | $3.90 \times 10^{-2}$ |
| LPE (16:1)           | 0.038 | -0.57 | $3.90 \times 10^{-2}$ |
| LPE (20:3)           | 0.037 | -0.57 | $3.90 \times 10^{-2}$ |

|                      |       |       |                       |
|----------------------|-------|-------|-----------------------|
| LPE (22:5)           | 0.043 | -0.57 | $3.90 \times 10^{-2}$ |
| MAG (16:1)           | 0.038 | -0.57 | $3.90 \times 10^{-2}$ |
| PE.P (18:1/22:6)     | 0.040 | 0.57  | $3.90 \times 10^{-2}$ |
| PI (18:0/18:1)       | 0.031 | -0.57 | $3.90 \times 10^{-2}$ |
| PI (18:1/16:1)       | 0.036 | -0.57 | $3.90 \times 10^{-2}$ |
| PI (18:1/20:3)       | 0.037 | -0.57 | $3.90 \times 10^{-2}$ |
| TAG (46:0)_FA (14:0) | 0.028 | -0.57 | $3.90 \times 10^{-2}$ |
| TAG (50:1)_FA (20:1) | 0.024 | -0.57 | $3.90 \times 10^{-2}$ |
| TAG (50:2)_FA (18:2) | 0.035 | -0.57 | $3.90 \times 10^{-2}$ |
| TAG (51:0)_FA (17:0) | 0.032 | -0.57 | $3.90 \times 10^{-2}$ |
| TAG (53:3)_FA (17:0) | 0.031 | -0.57 | $3.90 \times 10^{-2}$ |
| TAG (54:4)_FA (20:4) | 0.035 | -0.57 | $3.90 \times 10^{-2}$ |
| H4CH                 | 0.043 | 0.57  | $4.15 \times 10^{-2}$ |
| TPCH                 | 0.046 | 0.56  | $4.17 \times 10^{-2}$ |
| VLPL                 | 0.034 | -0.56 | $4.17 \times 10^{-2}$ |
| DAG (18:0/22:6)      | 0.028 | -0.56 | $4.17 \times 10^{-2}$ |
| DAG (18:1/22:4)      | 0.036 | -0.56 | $4.17 \times 10^{-2}$ |
| DAG (18:1/22:6)      | 0.030 | -0.56 | $4.17 \times 10^{-2}$ |
| LPC (18:3)           | 0.028 | -0.56 | $4.17 \times 10^{-2}$ |
| PE (18:2/18:3)       | 0.037 | -0.56 | $4.17 \times 10^{-2}$ |
| TAG (44:1)_FA (16:0) | 0.022 | -0.56 | $4.17 \times 10^{-2}$ |
| TAG (46:0)_FA (16:0) | 0.028 | -0.56 | $4.17 \times 10^{-2}$ |
| TAG (46:1)_FA (16:0) | 0.022 | -0.56 | $4.17 \times 10^{-2}$ |
| TAG (49:1)_FA (14:0) | 0.025 | -0.56 | $4.17 \times 10^{-2}$ |
| TAG (50:2)_FA (20:2) | 0.023 | -0.56 | $4.17 \times 10^{-2}$ |
| TAG (51:2)_FA (18:2) | 0.022 | -0.56 | $4.17 \times 10^{-2}$ |
| TAG (52:0)_FA (18:0) | 0.042 | -0.56 | $4.17 \times 10^{-2}$ |
| TAG (52:2)_FA (18:0) | 0.042 | -0.56 | $4.17 \times 10^{-2}$ |
| TAG (52:4)_FA (18:0) | 0.028 | -0.56 | $4.17 \times 10^{-2}$ |
| TAG (52:4)_FA (20:4) | 0.035 | -0.56 | $4.17 \times 10^{-2}$ |
| TAG (52:8)_FA (18:2) | 0.032 | -0.56 | $4.17 \times 10^{-2}$ |
| TAG (54:2)_FA (18:2) | 0.034 | -0.56 | $4.17 \times 10^{-2}$ |
| TAG (54:4)_FA (22:4) | 0.030 | -0.56 | $4.17 \times 10^{-2}$ |
| TAG (54:6)_FA (16:0) | 0.034 | -0.56 | $4.17 \times 10^{-2}$ |
| TAG (54:6)_FA (18:3) | 0.027 | -0.56 | $4.17 \times 10^{-2}$ |
| TAG (55:3)_FA (18:1) | 0.047 | -0.56 | $4.17 \times 10^{-2}$ |
| TAG (56:3)_FA (20:1) | 0.047 | -0.56 | $4.17 \times 10^{-2}$ |

|                           |       |       |                       |
|---------------------------|-------|-------|-----------------------|
| TAG (56:5)_FA (22:4)      | 0.032 | -0.56 | 4.17x10 <sup>-2</sup> |
| TAG (56:8)_FA (18:1)      | 0.029 | -0.56 | 4.17x10 <sup>-2</sup> |
| 3-hydroxyanthranilic acid | 0.031 | -0.55 | 4.43x10 <sup>-2</sup> |
| HDTG                      | 0.049 | -0.55 | 4.43x10 <sup>-2</sup> |
| IDFC                      | 0.043 | -0.55 | 4.43x10 <sup>-2</sup> |
| V1CH                      | 0.029 | -0.55 | 4.43x10 <sup>-2</sup> |
| V4CH                      | 0.041 | -0.55 | 4.43x10 <sup>-2</sup> |
| CE (18:0)                 | 0.039 | 0.55  | 4.43x10 <sup>-2</sup> |
| CE (20:1)                 | 0.035 | 0.55  | 4.43x10 <sup>-2</sup> |
| CE (22:5)                 | 0.044 | 0.55  | 4.43x10 <sup>-2</sup> |
| DAG (16:0/16:1)           | 0.034 | -0.55 | 4.43x10 <sup>-2</sup> |
| DAG (18:1/22:5)           | 0.035 | -0.55 | 4.43x10 <sup>-2</sup> |
| DCER (22:1)               | 0.024 | -0.55 | 4.43x10 <sup>-2</sup> |
| LPE (16:0)                | 0.035 | -0.55 | 4.43x10 <sup>-2</sup> |
| PE.O (16:0/20:4)          | 0.034 | 0.55  | 4.43x10 <sup>-2</sup> |
| PE.P (18:0/22:6)          | 0.037 | 0.55  | 4.43x10 <sup>-2</sup> |
| PE.P (18:1/18:0)          | 0.035 | -0.55 | 4.43x10 <sup>-2</sup> |
| PI (18:1/20:4)            | 0.030 | -0.55 | 4.43x10 <sup>-2</sup> |
| SM (24:1)                 | 0.043 | 0.55  | 4.43x10 <sup>-2</sup> |
| TAG (46:2)_FA (16:0)      | 0.021 | -0.55 | 4.43x10 <sup>-2</sup> |
| TAG (46:2)_FA (18:1)      | 0.025 | -0.55 | 4.43x10 <sup>-2</sup> |
| TAG (47:2)_FA (18:1)      | 0.024 | -0.55 | 4.43x10 <sup>-2</sup> |
| TAG (50:4)_FA (18:3)      | 0.025 | -0.55 | 4.43x10 <sup>-2</sup> |
| TAG (52:2)_FA (20:1)      | 0.023 | -0.55 | 4.43x10 <sup>-2</sup> |
| TAG (52:3)_FA (18:0)      | 0.032 | -0.55 | 4.43x10 <sup>-2</sup> |
| TAG (53:2)_FA (18:2)      | 0.023 | -0.55 | 4.43x10 <sup>-2</sup> |
| TAG (53:3)_FA (16:0)      | 0.031 | -0.55 | 4.43x10 <sup>-2</sup> |
| TAG (55:2)_FA (18:1)      | 0.048 | -0.55 | 4.43x10 <sup>-2</sup> |
| TAG (55:4)_FA (18:1)      | 0.046 | -0.55 | 4.43x10 <sup>-2</sup> |
| TAG (56:4)_FA (18:0)      | 0.039 | -0.55 | 4.43x10 <sup>-2</sup> |
| TAG (56:6)_FA (16:0)      | 0.033 | -0.55 | 4.43x10 <sup>-2</sup> |
| TAG (56:6)_FA (18:1)      | 0.041 | -0.55 | 4.43x10 <sup>-2</sup> |
| L5FC                      | 0.046 | 0.54  | 4.56x10 <sup>-2</sup> |
| Acetone                   | 0.008 | 0.53  | 4.66x10 <sup>-2</sup> |
| Glucose                   | 0.031 | -0.54 | 4.88x10 <sup>-2</sup> |
| Xanthurenic acid          | 0.029 | -0.54 | 4.88x10 <sup>-2</sup> |
| V3CH                      | 0.035 | -0.54 | 4.88x10 <sup>-2</sup> |

|                      |       |       |                       |
|----------------------|-------|-------|-----------------------|
| DAG (16:0/20:3)      | 0.032 | -0.54 | $4.88 \times 10^{-2}$ |
| DCER (26:0)          | 0.044 | 0.54  | $4.88 \times 10^{-2}$ |
| LPE (22:4)           | 0.036 | -0.54 | $4.88 \times 10^{-2}$ |
| PC (18:0/18:1)       | 0.036 | -0.54 | $4.88 \times 10^{-2}$ |
| PE (18:0/20:3)       | 0.040 | -0.54 | $4.88 \times 10^{-2}$ |
| PE (18:0/20:5)       | 0.031 | -0.54 | $4.88 \times 10^{-2}$ |
| TAG (45:0)_FA (16:0) | 0.023 | -0.54 | $4.88 \times 10^{-2}$ |
| TAG (48:5)_FA (18:2) | 0.031 | -0.54 | $4.88 \times 10^{-2}$ |
| TAG (50:2)_FA (14:0) | 0.040 | -0.54 | $4.88 \times 10^{-2}$ |
| TAG (50:5)_FA (20:5) | 0.028 | -0.54 | $4.88 \times 10^{-2}$ |
| TAG (52:2)_FA (16:1) | 0.041 | -0.54 | $4.80 \times 10^{-3}$ |
| TAG (54:4)_FA (18:2) | 0.036 | -0.54 | $4.81 \times 10^{-3}$ |
| TAG (54:7)_FA (18:3) | 0.028 | -0.54 | $4.89 \times 10^{-2}$ |

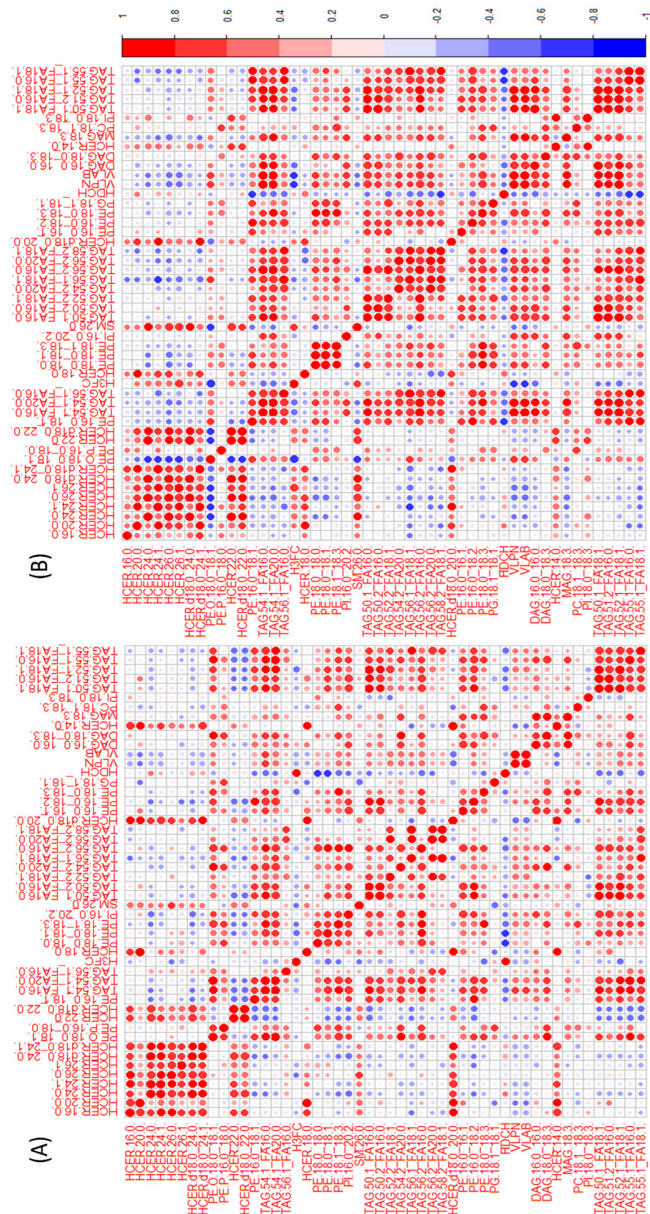

**Figure S14 - Correlation plot of the (A) survived model and (B) Did not survive model.** The top 50 metabolites are shown according to adjusted p-values.

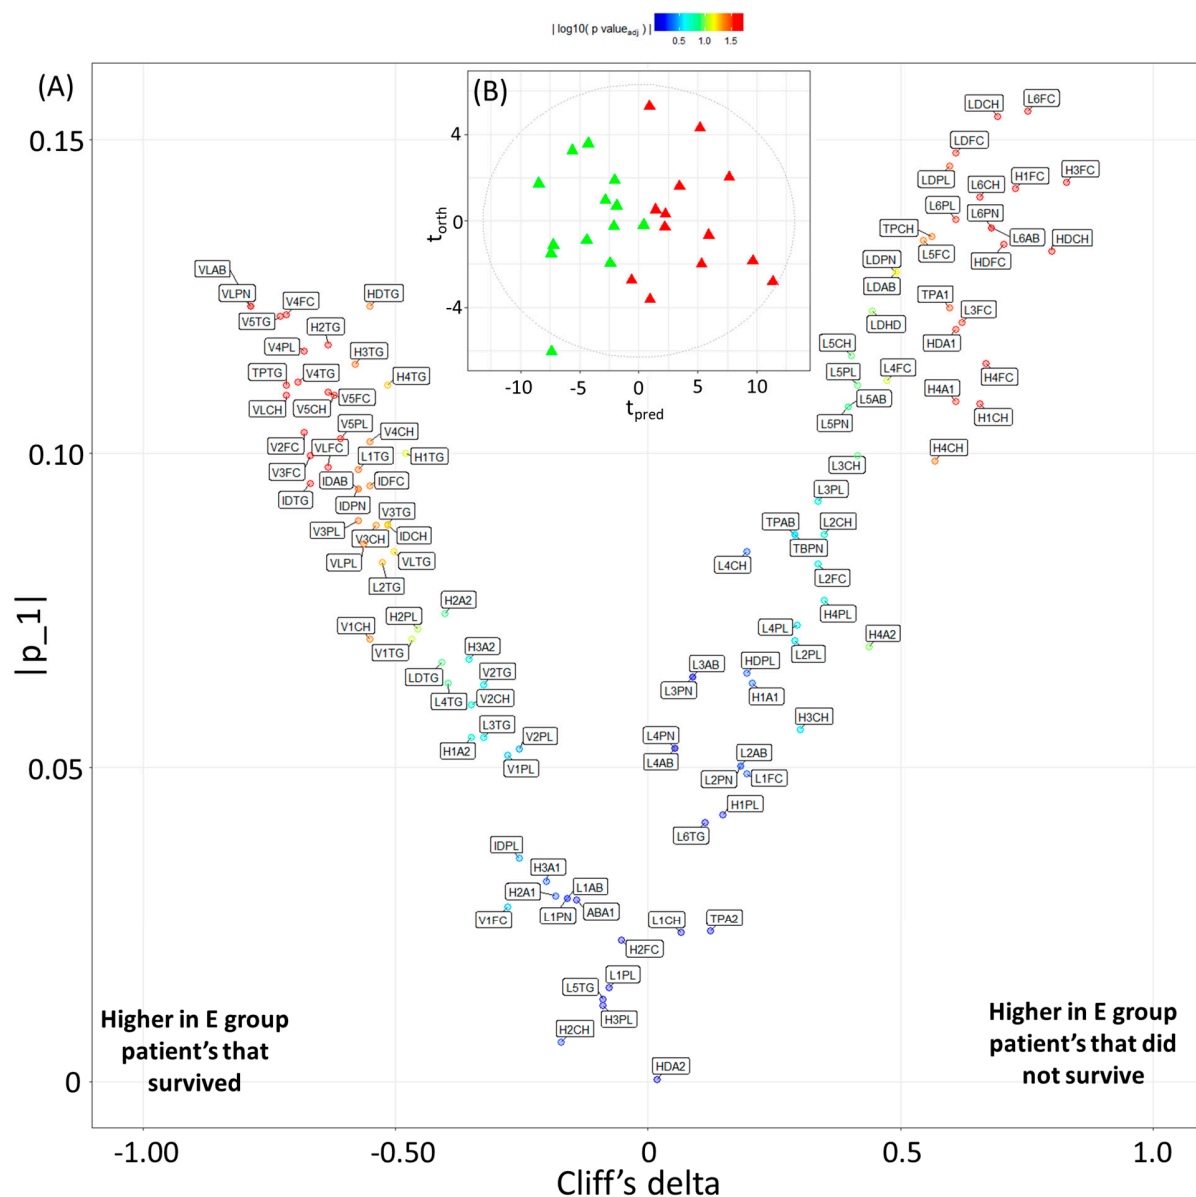

**Figure S15 – Modeling COVID-19 mortality prediction using only the lipoproteins** (A) Eruption plot of the severity group E patients who survived vs the severity group E patients who died. (B) O-PLS-DA of severity group E patients who survived (green triangles) and severity group E patients who died (red triangles),  $R^2X=0.32$ ,  $AUROC=0.81$ . Cliff's delta, OPLS loadings values and the adjusted p values for this model can be found in table S30.

**Table S32 - OPLS loadings, Cliff's delta and adjusted p-values of lipoprotein model for the comparison group E severity patients comparing who survived and who died, samples were age matched.** Only metabolites with significant p-values are shown in the table.

| Metabolite | OPLS loadings | Cliff's delta | Adjusted p-value      |
|------------|---------------|---------------|-----------------------|
| HDCH       | 0.132         | 0.80          | 1.82x10 <sup>-2</sup> |
| VLPN       | 0.123         | -0.79         | 1.82x10 <sup>-2</sup> |
| VLAB       | 0.123         | -0.79         | 1.82x10 <sup>-2</sup> |
| H3FC       | 0.143         | 0.83          | 1.82x10 <sup>-2</sup> |
| L6FC       | 0.154         | 0.75          | 1.98x10 <sup>-2</sup> |
| TPTG       | 0.111         | -0.72         | 2.04x10 <sup>-2</sup> |
| LDCH       | 0.154         | 0.69          | 2.04x10 <sup>-2</sup> |
| L6PN       | 0.136         | 0.68          | 2.04x10 <sup>-2</sup> |
| VLCH       | 0.109         | -0.72         | 2.04x10 <sup>-2</sup> |
| HDFC       | 0.133         | 0.70          | 2.04x10 <sup>-2</sup> |
| V4TG       | 0.111         | -0.69         | 2.04x10 <sup>-2</sup> |
| V5TG       | 0.122         | -0.73         | 2.04x10 <sup>-2</sup> |
| V2FC       | 0.103         | -0.68         | 2.04x10 <sup>-2</sup> |
| V4FC       | 0.122         | -0.72         | 2.04x10 <sup>-2</sup> |
| V4PL       | 0.116         | -0.68         | 2.04x10 <sup>-2</sup> |
| L6AB       | 0.136         | 0.68          | 2.04x10 <sup>-2</sup> |
| H1FC       | 0.412         | 0.73          | 2.04x10 <sup>-2</sup> |
| H4FC       | 0.114         | 0.67          | 2.04x10 <sup>-2</sup> |
| IDTG       | 0.095         | -0.67         | 2.11x10 <sup>-2</sup> |
| V3FC       | 0.100         | -0.67         | 2.11x10 <sup>-2</sup> |
| L6CH       | 0.141         | 0.66          | 2.16x10 <sup>-2</sup> |
| H1CH       | 0.108         | 0.66          | 2.25x10 <sup>-2</sup> |
| VLFC       | 0.098         | -0.63         | 2.72x10 <sup>-2</sup> |
| V5FC       | 0.110         | -0.63         | 2.72x10 <sup>-2</sup> |
| H2TG       | 0.117         | -0.63         | 2.72x10 <sup>-2</sup> |
| LDFC       | 0.148         | 0.61          | 2.89x10 <sup>-2</sup> |
| HDA1       | 0.120         | 0.61          | 2.89x10 <sup>-2</sup> |
| V5CH       | 0.109         | -0.62         | 2.89x10 <sup>-2</sup> |
| V5PL       | 0.102         | -0.61         | 2.89x10 <sup>-2</sup> |
| L3FC       | 0.121         | 0.62          | 2.89x10 <sup>-2</sup> |
| L6PL       | 0.137         | 0.61          | 2.89x10 <sup>-2</sup> |
| H4A1       | 0.108         | 0.61          | 2.89x10 <sup>-2</sup> |
| TPA1       | 0.123         | 0.60          | 3.16x10 <sup>-2</sup> |

|      |       |       |                       |
|------|-------|-------|-----------------------|
| LDPL | 0.146 | 0.60  | $3.16 \times 10^{-2}$ |
| IDPN | 0.094 | -0.57 | $3.70 \times 10^{-2}$ |
| IDAB | 0.094 | -0.57 | $3.70 \times 10^{-2}$ |
| V3PL | 0.089 | -0.57 | $3.70 \times 10^{-2}$ |
| L1TG | 0.097 | -0.57 | $3.70 \times 10^{-2}$ |
| H3TG | 0.114 | -0.58 | $3.70 \times 10^{-2}$ |
| H4CH | 0.099 | 0.57  | $3.85 \times 10^{-2}$ |
| TPCH | 0.134 | 0.56  | $3.96 \times 10^{-2}$ |
| VLPL | 0.086 | -0.56 | $3.96 \times 10^{-2}$ |
| HDTG | 0.123 | -0.55 | $4.16 \times 10^{-2}$ |
| IDFC | 0.095 | -0.55 | $4.16 \times 10^{-2}$ |
| V1CH | 0.071 | -0.55 | $4.16 \times 10^{-2}$ |
| V4CH | 0.102 | -0.55 | $4.16 \times 10^{-2}$ |
| L5FC | 0.135 | 0.54  | $4.20 \times 10^{-2}$ |
| V3CH | 0.089 | -0.54 | $4.58 \times 10^{-2}$ |

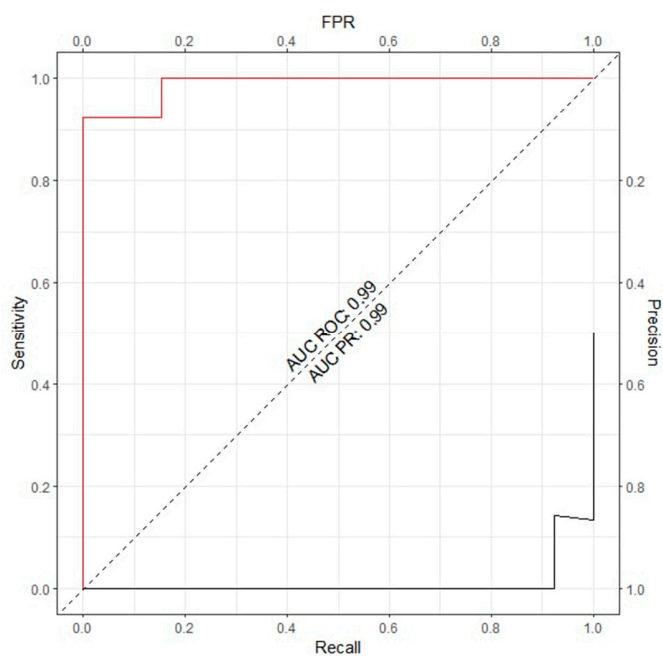

Figure S16 - AUROC showing prediction of mortality (AUCROC = 0.99) built using HCer 16:0 and PEO 18:0\_18:1
